# Supplementary material for: Metagenomic Analysis Reveals Symbiotic Relationship among Bacteria in Microcystis-Dominated Community
Source: Front Microbiol. 2016 Feb 2;7:56. doi: 10.3389/fmicb.2016.00056 (PMC4735357; doi:10.3389/fmicb.2016.00056)
Supplement: Supplementary file 1 [file Table1.XLSX]

## Sheet: Group1
NODE_1001_length_5582_cov_0.995284_ID_1915
NODE_1011_length_5524_cov_1.00513_ID_1935
NODE_1035_length_5422_cov_1.18943_ID_1985
NODE_1045_length_5345_cov_1.21816_ID_2001
NODE_1050_length_5315_cov_0.968929_ID_2011
NODE_1053_length_5306_cov_0.995799_ID_3263
NODE_1059_length_5269_cov_0.912115_ID_2295
NODE_1063_length_5261_cov_1.11133_ID_2035
NODE_1067_length_5236_cov_1.26224_ID_2041
NODE_1069_length_5225_cov_1.08398_ID_2045
NODE_1086_length_5123_cov_1.07004_ID_2081
NODE_1095_length_5064_cov_1.0957_ID_6793
NODE_1097_length_5055_cov_1.18251_ID_2265
NODE_1099_length_5052_cov_0.922737_ID_48719
NODE_1108_length_5008_cov_0.929945_ID_2123
NODE_1115_length_4991_cov_1.03982_ID_2135
NODE_1118_length_4983_cov_0.99593_ID_2141
NODE_1119_length_4981_cov_2.44116_ID_47089
NODE_1156_length_4838_cov_0.896205_ID_2217
NODE_1165_length_4803_cov_1.23743_ID_2237
NODE_1167_length_4799_cov_1.33679_ID_2241
NODE_1179_length_4745_cov_0.76882_ID_2267
NODE_1195_length_4674_cov_0.895983_ID_6119
NODE_1201_length_4651_cov_1.13269_ID_2311
NODE_1206_length_4640_cov_1.07963_ID_2741
NODE_1210_length_4629_cov_0.971272_ID_2323
NODE_1213_length_4623_cov_1.12033_ID_2327
NODE_1241_length_4525_cov_0.760323_ID_2847
NODE_1247_length_4511_cov_1.09793_ID_30511
NODE_1251_length_4487_cov_0.890675_ID_2399
NODE_1257_length_4463_cov_1.09172_ID_2411
NODE_1258_length_4463_cov_1.03186_ID_2413
NODE_1261_length_4447_cov_2.69598_ID_3871
NODE_1268_length_4426_cov_1.03374_ID_3417
NODE_1270_length_4424_cov_1.01355_ID_2441
NODE_1298_length_4347_cov_0.9259_ID_7105
NODE_1304_length_4326_cov_1.02279_ID_2509
NODE_1306_length_4316_cov_0.945138_ID_2515
NODE_1336_length_4239_cov_1.02518_ID_16479
NODE_1337_length_4237_cov_1.85197_ID_2739
NODE_133_length_45322_cov_1.28586_ID_255
NODE_1341_length_4227_cov_1.06277_ID_2577
NODE_1392_length_4082_cov_1.11886_ID_2873
NODE_1414_length_4026_cov_0.980794_ID_2723
NODE_1417_length_4014_cov_1.1924_ID_2731
NODE_1420_length_4011_cov_1.12303_ID_2737
NODE_1432_length_3973_cov_0.994109_ID_2765
NODE_1433_length_3971_cov_1.06356_ID_2767
NODE_1439_length_3960_cov_1.0054_ID_2781
NODE_1441_length_3955_cov_0.983531_ID_2785
NODE_1445_length_3949_cov_1.55438_ID_2793
NODE_144_length_41459_cov_1.69336_ID_297
NODE_1451_length_3939_cov_1.0155_ID_2807
NODE_1457_length_3906_cov_1.20433_ID_10357
NODE_1459_length_3902_cov_0.945995_ID_35347
NODE_1464_length_3891_cov_1.12323_ID_2827
NODE_1506_length_3783_cov_1.19952_ID_2911
NODE_1510_length_3778_cov_1.07199_ID_25233
NODE_1515_length_3763_cov_1.21305_ID_2927
NODE_152_length_39030_cov_1.21003_ID_299
NODE_1530_length_3732_cov_1.24652_ID_2949
NODE_1544_length_3699_cov_1.00523_ID_2975
NODE_1547_length_3693_cov_1.52621_ID_2979
NODE_1564_length_3659_cov_0.934819_ID_13507
NODE_1582_length_3626_cov_1.19764_ID_3033
NODE_1599_length_3594_cov_1.20993_ID_3059
NODE_1611_length_3578_cov_0.705329_ID_3903
NODE_1635_length_3545_cov_0.901611_ID_4555
NODE_1638_length_3540_cov_0.828292_ID_3123
NODE_1647_length_3530_cov_1.04478_ID_3139
NODE_1653_length_3518_cov_1.02928_ID_32523
NODE_165_length_36473_cov_1.07919_ID_367
NODE_1684_length_3462_cov_1.0504_ID_3491
NODE_1700_length_3442_cov_1.0922_ID_3229
NODE_1703_length_3429_cov_0.922917_ID_3861
NODE_1705_length_3429_cov_1.12946_ID_91577
NODE_1706_length_3427_cov_0.978261_ID_23467
NODE_1708_length_3425_cov_1.21871_ID_3239
NODE_1723_length_3406_cov_1.15613_ID_3259
NODE_1725_length_3404_cov_0.945427_ID_92281
NODE_1731_length_3394_cov_0.894737_ID_3275
NODE_1748_length_3374_cov_1.17005_ID_3307
NODE_176_length_33526_cov_1.13462_ID_377
NODE_1798_length_3317_cov_0.932882_ID_3393
NODE_1835_length_3263_cov_0.793989_ID_70553
NODE_1903_length_3166_cov_1.39877_ID_91929
NODE_1927_length_3134_cov_1.18173_ID_3617
NODE_192_length_30215_cov_1.07099_ID_389
NODE_1939_length_3116_cov_0.783394_ID_3641
NODE_1955_length_3096_cov_0.932607_ID_3667
NODE_195_length_29686_cov_1.10362_ID_387
NODE_199_length_28793_cov_1.1827_ID_445
NODE_2026_length_2994_cov_1.17368_ID_3783
NODE_2027_length_2993_cov_1.25308_ID_3785
NODE_2054_length_2961_cov_1.26867_ID_3827
NODE_2072_length_2940_cov_0.758272_ID_3859
NODE_2075_length_2935_cov_1.09351_ID_3869
NODE_2105_length_2900_cov_1.6775_ID_3929
NODE_2123_length_2882_cov_0.92037_ID_3955
NODE_2139_length_2869_cov_1.22071_ID_3985
NODE_2147_length_2863_cov_1.11131_ID_3997
NODE_2159_length_2848_cov_1.11227_ID_4017
NODE_215_length_26621_cov_1.25723_ID_423
NODE_216_length_26373_cov_1.15838_ID_425
NODE_2170_length_2840_cov_0.807651_ID_4039
NODE_2219_length_2790_cov_0.838662_ID_4119
NODE_2238_length_2776_cov_0.753232_ID_6607
NODE_2241_length_2775_cov_0.977458_ID_4155
NODE_224_length_25688_cov_1.24821_ID_443
NODE_2256_length_2752_cov_0.813269_ID_5841
NODE_2257_length_2751_cov_1.01417_ID_4185
NODE_225_length_25524_cov_1.14225_ID_447
NODE_2274_length_2733_cov_0.885135_ID_4215
NODE_2276_length_2732_cov_0.944424_ID_4219
NODE_2284_length_2718_cov_0.970932_ID_4233
NODE_2286_length_2714_cov_0.988658_ID_4237
NODE_228_length_25227_cov_1.09671_ID_493
NODE_2290_length_2710_cov_1.29156_ID_4243
NODE_2300_length_2704_cov_0.971537_ID_4261
NODE_2312_length_2689_cov_0.84771_ID_4283
NODE_231_length_24498_cov_1.11691_ID_459
NODE_2328_length_2677_cov_0.98888_ID_4311
NODE_2337_length_2667_cov_1.23441_ID_4325
NODE_233_length_24392_cov_1.09353_ID_495
NODE_2344_length_2662_cov_1.027_ID_4339
NODE_2389_length_2631_cov_1.05425_ID_4413
NODE_239_length_23830_cov_1.15551_ID_557
NODE_240_length_23648_cov_1.06001_ID_471
NODE_2425_length_2599_cov_0.930435_ID_4477
NODE_2434_length_2596_cov_1.11634_ID_4495
NODE_2446_length_2583_cov_1.12212_ID_4509
NODE_2458_length_2575_cov_1.12011_ID_4531
NODE_2467_length_2566_cov_0.902683_ID_4545
NODE_248_length_22704_cov_1.2243_ID_485
NODE_2521_length_2528_cov_0.927613_ID_4633
NODE_2522_length_2528_cov_1.00325_ID_14371
NODE_2547_length_2506_cov_0.982766_ID_4669
NODE_2549_length_2504_cov_1.2694_ID_4673
NODE_2567_length_2493_cov_0.902228_ID_4707
NODE_256_length_21774_cov_1.53117_ID_503
NODE_2575_length_2489_cov_1.01157_ID_4723
NODE_2579_length_2486_cov_0.704592_ID_4729
NODE_257_length_21718_cov_1.12352_ID_505
NODE_2589_length_2477_cov_1.20889_ID_4745
NODE_258_length_21560_cov_1.07426_ID_563
NODE_2599_length_2471_cov_1.08451_ID_4761
NODE_2646_length_2440_cov_1.25179_ID_4849
NODE_2655_length_2436_cov_0.973807_ID_8611
NODE_2671_length_2426_cov_1.1765_ID_4893
NODE_2672_length_2424_cov_1.17367_ID_5631
NODE_2687_length_2418_cov_1.28054_ID_4921
NODE_268_length_21125_cov_1.11427_ID_523
NODE_2695_length_2412_cov_0.861289_ID_4937
NODE_2722_length_2378_cov_0.873538_ID_4981
NODE_272_length_21007_cov_1.07603_ID_529
NODE_273_length_20929_cov_1.09923_ID_533
NODE_2786_length_2336_cov_0.851345_ID_5101
NODE_2788_length_2332_cov_1.01856_ID_5105
NODE_278_length_20634_cov_1.29327_ID_541
NODE_2798_length_2326_cov_0.937971_ID_5125
NODE_2824_length_2310_cov_1.01116_ID_5171
NODE_2830_length_2305_cov_0.847496_ID_5183
NODE_2832_length_2303_cov_1.1889_ID_5187
NODE_2834_length_2303_cov_1.14772_ID_5189
NODE_2849_length_2291_cov_1.0459_ID_5219
NODE_285_length_20139_cov_1.06537_ID_553
NODE_287_length_19977_cov_1.15396_ID_637
NODE_289_length_19722_cov_1.18013_ID_573
NODE_2930_length_2249_cov_0.806422_ID_5373
NODE_2932_length_2248_cov_1.26021_ID_5377
NODE_2943_length_2244_cov_1.01241_ID_5397
NODE_294_length_19335_cov_1.15125_ID_571
NODE_2978_length_2225_cov_0.758349_ID_5461
NODE_298_length_19160_cov_1.20601_ID_575
NODE_3015_length_2211_cov_0.922969_ID_5533
NODE_302_length_18753_cov_1.10902_ID_583
NODE_304_length_18702_cov_1.05174_ID_969
NODE_3072_length_2177_cov_1.07875_ID_5643
NODE_3074_length_2176_cov_0.81775_ID_5647
NODE_310_length_18410_cov_1.36443_ID_591
NODE_312_length_18300_cov_1.13757_ID_649
NODE_314_length_18231_cov_1.21842_ID_657
NODE_3162_length_2132_cov_1.08531_ID_5815
NODE_316_length_18227_cov_1.05149_ID_599
NODE_3173_length_2128_cov_1.16124_ID_5837
NODE_3174_length_2128_cov_1.34483_ID_5839
NODE_317_length_18222_cov_1.26189_ID_689
NODE_3182_length_2124_cov_1.23212_ID_5857
NODE_3188_length_2120_cov_0.768893_ID_5867
NODE_3196_length_2113_cov_1.09344_ID_5883
NODE_319_length_18075_cov_1.09802_ID_623
NODE_3200_length_2112_cov_1.24719_ID_5891
NODE_3211_length_2108_cov_1.00245_ID_10683
NODE_3232_length_2101_cov_0.761811_ID_5953
NODE_326_length_17835_cov_1.79883_ID_675
NODE_328_length_17772_cov_1.12828_ID_761
NODE_3295_length_2069_cov_0.715_ID_42665
NODE_3303_length_2066_cov_0.917877_ID_6075
NODE_3309_length_2065_cov_0.962926_ID_6087
NODE_332_length_17507_cov_1.17846_ID_629
NODE_340_length_16773_cov_1.04693_ID_699
NODE_343_length_16614_cov_1.08383_ID_823
NODE_3476_length_1998_cov_1.20581_ID_6401
NODE_347_length_16530_cov_1.19987_ID_781
NODE_348_length_16519_cov_1.13635_ID_653
NODE_3501_length_1987_cov_0.965589_ID_6445
NODE_350_length_16317_cov_1.02997_ID_663
NODE_352_length_16271_cov_1.16986_ID_665
NODE_3569_length_1961_cov_0.794397_ID_6575
NODE_3573_length_1958_cov_1.19746_ID_6583
NODE_3587_length_1954_cov_1.41538_ID_6611
NODE_360_length_16033_cov_1.07035_ID_681
NODE_3618_length_1942_cov_0.723438_ID_6673
NODE_361_length_16031_cov_1.09748_ID_683
NODE_3620_length_1942_cov_1.20876_ID_6677
NODE_362_length_15975_cov_1.64152_ID_765
NODE_363_length_15969_cov_1.07597_ID_687
NODE_364_length_15954_cov_1.31961_ID_691
NODE_3665_length_1921_cov_1.13823_ID_6761
NODE_367_length_15847_cov_1.07587_ID_933
NODE_3683_length_1911_cov_1.17318_ID_6797
NODE_3688_length_1910_cov_0.675177_ID_91977
NODE_3730_length_1898_cov_1.0175_ID_6875
NODE_373_length_15411_cov_1.16328_ID_709
NODE_378_length_15230_cov_1.10567_ID_859
NODE_3807_length_1872_cov_1.44759_ID_7021
NODE_381_length_15182_cov_1.11751_ID_795
NODE_382_length_15160_cov_1.14366_ID_723
NODE_384_length_15086_cov_1.04328_ID_771
NODE_386_length_14937_cov_1.01735_ID_1089
NODE_388_length_14875_cov_0.982777_ID_733
NODE_3910_length_1841_cov_1.10892_ID_7221
NODE_391_length_14837_cov_0.954902_ID_775
NODE_393_length_14789_cov_1.00238_ID_743
NODE_3942_length_1829_cov_0.866477_ID_7285
NODE_398_length_14622_cov_1.27685_ID_755
NODE_4007_length_1809_cov_1.29023_ID_7407
NODE_400_length_14508_cov_1.14717_ID_763
NODE_403_length_14287_cov_1.16887_ID_991
NODE_406_length_14107_cov_1.22988_ID_777
NODE_408_length_14062_cov_1.08283_ID_813
NODE_409_length_14027_cov_1.18427_ID_779
NODE_4137_length_1773_cov_1.26702_ID_7659
NODE_415_length_13588_cov_1.14824_ID_793
NODE_417_length_13507_cov_1.04405_ID_955
NODE_419_length_13499_cov_1.15845_ID_799
NODE_4217_length_1750_cov_0.859012_ID_7811
NODE_4230_length_1744_cov_0.984478_ID_7837
NODE_4242_length_1741_cov_0.938995_ID_7863
NODE_425_length_13289_cov_1.18926_ID_945
NODE_4264_length_1734_cov_0.872072_ID_7907
NODE_426_length_13288_cov_1.40109_ID_811
NODE_428_length_13257_cov_1.03352_ID_1077
NODE_4291_length_1725_cov_0.925121_ID_7959
NODE_429_length_13186_cov_1.0372_ID_817
NODE_4301_length_1723_cov_1.09492_ID_7979
NODE_4329_length_1716_cov_0.822708_ID_74195
NODE_436_length_13004_cov_1.31465_ID_1005
NODE_4401_length_1695_cov_0.700492_ID_8167
NODE_4420_length_1690_cov_0.883405_ID_8205
NODE_4435_length_1684_cov_1.31207_ID_62913
NODE_444_length_12849_cov_1.24789_ID_845
NODE_4455_length_1678_cov_0.906774_ID_8275
NODE_448_length_12730_cov_1.07756_ID_849
NODE_449_length_12714_cov_1.05931_ID_857
NODE_4516_length_1661_cov_0.910804_ID_8393
NODE_4522_length_1660_cov_0.820239_ID_8405
NODE_4527_length_1659_cov_1.0044_ID_8415
NODE_454_length_12487_cov_1.21437_ID_893
NODE_457_length_12314_cov_1.17558_ID_1017
NODE_458_length_12227_cov_1.17059_ID_1553
NODE_4622_length_1635_cov_0.974457_ID_8601
NODE_471_length_11871_cov_1.35053_ID_1201
NODE_472_length_11856_cov_1.12234_ID_1261
NODE_475_length_11760_cov_1.11214_ID_1303
NODE_4812_length_1589_cov_1.25658_ID_8967
NODE_4825_length_1587_cov_1.08959_ID_8993
NODE_4844_length_1582_cov_0.832122_ID_9035
NODE_484_length_11622_cov_0.952393_ID_1193
NODE_485_length_11608_cov_1.08978_ID_915
NODE_486_length_11586_cov_1.13919_ID_1135
NODE_494_length_11448_cov_1.02909_ID_1269
NODE_497_length_11389_cov_1.16652_ID_931
NODE_498_length_11374_cov_1.07023_ID_935
NODE_499_length_11359_cov_1.03047_ID_937
NODE_5019_length_1544_cov_0.907797_ID_20339
NODE_501_length_11289_cov_1.11889_ID_999
NODE_503_length_11268_cov_1.26493_ID_1149
NODE_5041_length_1539_cov_1.1898_ID_9417
NODE_504_length_11262_cov_1.09819_ID_1411
NODE_5085_length_1530_cov_0.854894_ID_9499
NODE_509_length_11000_cov_1.06925_ID_957
NODE_5106_length_1526_cov_0.890872_ID_9541
NODE_5110_length_1525_cov_1.25893_ID_9549
NODE_512_length_10943_cov_1.07633_ID_1289
NODE_513_length_10939_cov_1.09696_ID_963
NODE_5164_length_1517_cov_1.07804_ID_9655
NODE_519_length_10827_cov_1.09175_ID_967
NODE_5220_length_1504_cov_1.15401_ID_64575
NODE_5265_length_1496_cov_0.656622_ID_9851
NODE_5330_length_1483_cov_0.645686_ID_9975
NODE_538_length_10580_cov_1.18362_ID_1001
NODE_5395_length_1469_cov_1.44429_ID_10103
NODE_5459_length_1456_cov_1.0137_ID_10233
NODE_551_length_10180_cov_1.17783_ID_1037
NODE_552_length_10137_cov_0.987584_ID_1041
NODE_553_length_10133_cov_1.15292_ID_1043
NODE_557_length_10103_cov_1.00618_ID_1051
NODE_558_length_10103_cov_1.14391_ID_1187
NODE_562_length_10044_cov_1.25404_ID_1183
NODE_570_length_9904_cov_1.018_ID_1199
NODE_5755_length_1408_cov_0.742345_ID_10813
NODE_582_length_9692_cov_1.19588_ID_1091
NODE_583_length_9675_cov_1.16573_ID_1503
NODE_584_length_9674_cov_1.03977_ID_1093
NODE_5851_length_1390_cov_0.63891_ID_10997
NODE_5882_length_1385_cov_0.971125_ID_11057
NODE_595_length_9540_cov_1.2836_ID_1637
NODE_597_length_9501_cov_1.08439_ID_2371
NODE_6019_length_1362_cov_0.6628_ID_52219
NODE_601_length_9440_cov_1.21556_ID_1121
NODE_6025_length_1361_cov_0.896285_ID_11331
NODE_605_length_9371_cov_1.22329_ID_1125
NODE_6101_length_1348_cov_0.795152_ID_41159
NODE_6111_length_1346_cov_0.723571_ID_56941
NODE_6136_length_1342_cov_0.914375_ID_11547
NODE_618_length_8977_cov_1.18534_ID_1157
NODE_620_length_8951_cov_1.09469_ID_2513
NODE_621_length_8918_cov_1.14194_ID_1161
NODE_622_length_8912_cov_1.08674_ID_1163
NODE_626_length_8893_cov_1.04964_ID_2489
NODE_6288_length_1320_cov_0.669065_ID_11839
NODE_632_length_8825_cov_1.04637_ID_2287
NODE_633_length_8787_cov_1.17275_ID_1181
NODE_634_length_8757_cov_1.09289_ID_2113
NODE_635_length_8755_cov_1.04778_ID_1185
NODE_637_length_8734_cov_1.08125_ID_1191
NODE_6424_length_1302_cov_1.22628_ID_92091
NODE_644_length_8676_cov_1.20576_ID_1213
NODE_646_length_8621_cov_0.970884_ID_1223
NODE_6475_length_1295_cov_0.867863_ID_12195
NODE_647_length_8595_cov_1.17535_ID_1225
NODE_651_length_8582_cov_1.39939_ID_1231
NODE_652_length_8576_cov_1.49618_ID_1233
NODE_655_length_8559_cov_1.01649_ID_1239
NODE_659_length_8539_cov_0.983707_ID_1251
NODE_6603_length_1276_cov_0.59652_ID_12449
NODE_6732_length_1259_cov_0.857983_ID_12701
NODE_674_length_8393_cov_1.19125_ID_1277
NODE_6763_length_1256_cov_1.02022_ID_12761
NODE_6797_length_1252_cov_1.11074_ID_91541
NODE_679_length_8328_cov_1.07301_ID_1281
NODE_683_length_8276_cov_1.14488_ID_1321
NODE_6898_length_1238_cov_0.905047_ID_30055
NODE_690_length_8206_cov_0.983778_ID_1309
NODE_6915_length_1237_cov_1.07021_ID_13055
NODE_6930_length_1235_cov_1.04631_ID_13085
NODE_6968_length_1231_cov_0.654905_ID_56153
NODE_702_length_8034_cov_1.09102_ID_1325
NODE_7035_length_1221_cov_1.15538_ID_13279
NODE_705_length_8003_cov_1.19057_ID_1331
NODE_7072_length_1215_cov_0.856021_ID_13353
NODE_709_length_7978_cov_1.20053_ID_1337
NODE_710_length_7973_cov_1.15385_ID_1339
NODE_711_length_7968_cov_1.22294_ID_2485
NODE_714_length_7945_cov_0.991747_ID_1347
NODE_715_length_7941_cov_0.930767_ID_2277
NODE_717_length_7910_cov_1.26821_ID_1351
NODE_718_length_7887_cov_1.21949_ID_1355
NODE_728_length_7774_cov_1.12109_ID_1375
NODE_730_length_7768_cov_1.19327_ID_1379
NODE_731_length_7754_cov_1.11919_ID_2467
NODE_736_length_7737_cov_1.13198_ID_21157
NODE_737_length_7722_cov_1.26173_ID_1389
NODE_740_length_7681_cov_1.33605_ID_1395
NODE_741_length_7677_cov_1.19138_ID_1397
NODE_746_length_7587_cov_1.1245_ID_1757
NODE_7498_length_1162_cov_1.3678_ID_14185
NODE_752_length_7503_cov_0.963949_ID_1429
NODE_753_length_7503_cov_1.18227_ID_2181
NODE_757_length_7489_cov_1.10647_ID_2727
NODE_765_length_7396_cov_1.09813_ID_1451
NODE_771_length_7299_cov_0.988658_ID_1465
NODE_772_length_7271_cov_1.1762_ID_1469
NODE_773_length_7265_cov_1.09255_ID_1471
NODE_774_length_7264_cov_0.979986_ID_1473
NODE_779_length_7182_cov_1.0568_ID_1669
NODE_783_length_7175_cov_1.12961_ID_1487
NODE_785_length_7164_cov_1.05483_ID_3079
NODE_787_length_7148_cov_1.11682_ID_1651
NODE_7922_length_1117_cov_0.860687_ID_15017
NODE_7960_length_1113_cov_0.829502_ID_15089
NODE_798_length_7050_cov_1.25054_ID_1515
NODE_800_length_7047_cov_1.06062_ID_1519
NODE_8030_length_1105_cov_1.09073_ID_15229
NODE_8064_length_1102_cov_1.22072_ID_15297
NODE_806_length_7006_cov_1.143_ID_1537
NODE_810_length_6987_cov_0.990171_ID_1803
NODE_817_length_6933_cov_1.06512_ID_2431
NODE_819_length_6927_cov_1.1012_ID_1563
NODE_8293_length_1079_cov_0.749505_ID_15739
NODE_8359_length_1072_cov_1.07876_ID_15865
NODE_837_length_6793_cov_1.06454_ID_1603
NODE_840_length_6777_cov_1.05665_ID_1609
NODE_843_length_6746_cov_0.845739_ID_5717
NODE_8457_length_1063_cov_1.02716_ID_16059
NODE_846_length_6712_cov_1.10944_ID_2017
NODE_847_length_6711_cov_0.982084_ID_3359
NODE_848_length_6711_cov_1.26573_ID_1615
NODE_851_length_6621_cov_1.13263_ID_1623
NODE_866_length_6517_cov_1.20952_ID_1655
NODE_868_length_6493_cov_0.999377_ID_2077
NODE_8711_length_1042_cov_0.757451_ID_16557
NODE_8726_length_1040_cov_1.14212_ID_16585
NODE_875_length_6419_cov_1.14268_ID_2525
NODE_880_length_6399_cov_1.06019_ID_1749
NODE_881_length_6395_cov_1.05612_ID_1681
NODE_882_length_6394_cov_1.0234_ID_7705
NODE_887_length_6367_cov_1.27294_ID_1695
NODE_8946_length_1022_cov_0.766002_ID_17011
NODE_894_length_6334_cov_1.09785_ID_1709
NODE_8966_length_1021_cov_0.631303_ID_32085
NODE_896_length_6283_cov_1.09269_ID_3285
NODE_897_length_6273_cov_1.42473_ID_2855
NODE_904_length_6222_cov_1.01349_ID_2341
NODE_914_length_6136_cov_1.29224_ID_1759
NODE_9171_length_1004_cov_0.575401_ID_17445
NODE_920_length_6084_cov_1.09742_ID_1835
NODE_932_length_5989_cov_1.07534_ID_1793
NODE_935_length_5961_cov_1.03377_ID_1867
NODE_941_length_5919_cov_1.15333_ID_1809
NODE_944_length_5908_cov_1.0399_ID_1815
NODE_948_length_5888_cov_0.998453_ID_3447
NODE_952_length_5861_cov_1.02814_ID_1829
NODE_956_length_5807_cov_1.25096_ID_1839
NODE_965_length_5753_cov_1.13142_ID_1855
NODE_966_length_5751_cov_0.924498_ID_8157
NODE_970_length_5719_cov_1.00336_ID_1863
NODE_988_length_5659_cov_1.48462_ID_1895
NODE_989_length_5643_cov_0.987801_ID_1897
NODE_990_length_5637_cov_0.884878_ID_1899
NODE_996_length_5610_cov_1.59321_ID_1907
NODE_997_length_5609_cov_1.11949_ID_2419

## Sheet: Group2
NODE_1012_length_5519_cov_0.968624_ID_1937
NODE_1017_length_5501_cov_1.15096_ID_1947
NODE_1021_length_5468_cov_1.01648_ID_1953
NODE_1023_length_5466_cov_1.16064_ID_1957
NODE_1026_length_5447_cov_1.00446_ID_1965
NODE_1029_length_5443_cov_1.03945_ID_1971
NODE_1039_length_5404_cov_1.31996_ID_4687
NODE_1044_length_5361_cov_1.15627_ID_1999
NODE_1046_length_5343_cov_1.03603_ID_2003
NODE_1052_length_5307_cov_1.03494_ID_2015
NODE_1061_length_5262_cov_0.785673_ID_2031
NODE_1087_length_5123_cov_1.02592_ID_2083
NODE_1090_length_5108_cov_0.888668_ID_2089
NODE_1117_length_4985_cov_0.862897_ID_2139
NODE_1141_length_4890_cov_1.26281_ID_2189
NODE_1143_length_4867_cov_1.02209_ID_2193
NODE_1146_length_4864_cov_1.06152_ID_2197
NODE_1150_length_4852_cov_1.15743_ID_2205
NODE_1163_length_4813_cov_0.923693_ID_2233
NODE_1174_length_4772_cov_1.34446_ID_2257
NODE_1186_length_4703_cov_1.11545_ID_2279
NODE_1202_length_4650_cov_1.00502_ID_2769
NODE_1203_length_4647_cov_0.874836_ID_2313
NODE_1219_length_4580_cov_0.924407_ID_2345
NODE_1229_length_4558_cov_1.16797_ID_2363
NODE_1236_length_4538_cov_1.1092_ID_2375
NODE_1242_length_4523_cov_1.14504_ID_2385
NODE_1244_length_4522_cov_1.11273_ID_3431
NODE_1249_length_4491_cov_1.13116_ID_2395
NODE_1253_length_4485_cov_0.930254_ID_2403
NODE_1262_length_4443_cov_1.15455_ID_2425
NODE_1269_length_4425_cov_0.966942_ID_2439
NODE_1275_length_4406_cov_1.05142_ID_2449
NODE_1279_length_4391_cov_0.988663_ID_2455
NODE_1282_length_4391_cov_1.2633_ID_2461
NODE_1291_length_4370_cov_0.971402_ID_2483
NODE_1292_length_4363_cov_0.999767_ID_2487
NODE_1302_length_4330_cov_1.10537_ID_2505
NODE_1320_length_4273_cov_1.04044_ID_2543
NODE_1326_length_4260_cov_1.13314_ID_2553
NODE_1354_length_4195_cov_1.2254_ID_31767
NODE_1358_length_4185_cov_1.38508_ID_2607
NODE_1370_length_4152_cov_1.07543_ID_2633
NODE_1373_length_4135_cov_0.822676_ID_4143
NODE_1376_length_4132_cov_1.70121_ID_2643
NODE_1382_length_4107_cov_1.14364_ID_2655
NODE_1383_length_4104_cov_0.970508_ID_2657
NODE_1397_length_4074_cov_0.770787_ID_2687
NODE_1398_length_4069_cov_1.11_ID_2689
NODE_1407_length_4036_cov_0.867658_ID_2709
NODE_1413_length_4028_cov_1.06037_ID_2721
NODE_1425_length_3989_cov_0.935459_ID_2751
NODE_1426_length_3983_cov_0.771845_ID_2753
NODE_1427_length_3981_cov_1.04013_ID_2755
NODE_1428_length_3980_cov_0.98696_ID_2757
NODE_1429_length_3979_cov_1.22379_ID_2759
NODE_1431_length_3974_cov_1.11959_ID_2763
NODE_1434_length_3969_cov_0.812821_ID_2771
NODE_1447_length_3946_cov_0.925458_ID_2797
NODE_1467_length_3887_cov_0.837873_ID_2833
NODE_1470_length_3864_cov_1.29065_ID_2839
NODE_1475_length_3859_cov_0.775726_ID_3701
NODE_1476_length_3857_cov_1.07418_ID_2851
NODE_1477_length_3856_cov_0.815157_ID_2853
NODE_1487_length_3826_cov_1.24674_ID_2875
NODE_1490_length_3815_cov_0.970101_ID_2881
NODE_1498_length_3804_cov_1.17055_ID_2895
NODE_1499_length_3800_cov_1.20933_ID_2897
NODE_1501_length_3797_cov_0.679185_ID_2901
NODE_1504_length_3791_cov_0.876411_ID_2909
NODE_1511_length_3775_cov_1.19752_ID_2919
NODE_1524_length_3745_cov_1.07345_ID_92299
NODE_1526_length_3741_cov_0.89951_ID_2943
NODE_1527_length_3738_cov_0.79831_ID_92163
NODE_1532_length_3725_cov_0.906455_ID_2955
NODE_1534_length_3720_cov_0.881128_ID_2959
NODE_1535_length_3719_cov_1.10082_ID_92059
NODE_1536_length_3717_cov_1.00055_ID_48297
NODE_1543_length_3701_cov_1.09306_ID_11
NODE_1548_length_3688_cov_0.977065_ID_91603
NODE_1553_length_3679_cov_1.15845_ID_2989
NODE_1554_length_3679_cov_1.19584_ID_20179
NODE_1555_length_3678_cov_0.733998_ID_2991
NODE_1558_length_3669_cov_0.824167_ID_91437
NODE_1560_length_3664_cov_1.27733_ID_92195
NODE_1562_length_3661_cov_1.2422_ID_91709
NODE_1563_length_3659_cov_1.26128_ID_91783
NODE_1566_length_3655_cov_0.936698_ID_3003
NODE_1573_length_3637_cov_0.925729_ID_91787
NODE_1577_length_3631_cov_0.998877_ID_193
NODE_1579_length_3628_cov_0.685586_ID_3027
NODE_1586_length_3618_cov_0.933502_ID_91655
NODE_1588_length_3615_cov_1.04399_ID_3043
NODE_1589_length_3611_cov_1.5782_ID_3045
NODE_1590_length_3610_cov_1.01214_ID_92207
NODE_1591_length_3608_cov_1.12009_ID_92293
NODE_1598_length_3598_cov_1.03372_ID_3057
NODE_1606_length_3587_cov_1.06453_ID_91763
NODE_1613_length_3576_cov_0.879954_ID_91691
NODE_1621_length_3560_cov_1.15869_ID_3093
NODE_1623_length_3558_cov_1.0086_ID_91919
NODE_1633_length_3546_cov_0.895024_ID_3115
NODE_1637_length_3540_cov_0.733794_ID_3121
NODE_1639_length_3539_cov_0.64121_ID_3125
NODE_1657_length_3512_cov_0.824862_ID_3155
NODE_1667_length_3490_cov_0.912014_ID_3173
NODE_1681_length_3463_cov_0.823807_ID_91471
NODE_1683_length_3463_cov_1.3574_ID_91493
NODE_1694_length_3449_cov_0.816568_ID_3217
NODE_1714_length_3417_cov_0.921147_ID_91799
NODE_1719_length_3412_cov_1.31858_ID_91529
NODE_1721_length_3407_cov_0.801078_ID_3257
NODE_1722_length_3407_cov_1.06381_ID_91547
NODE_172_length_34342_cov_0.879264_ID_357
NODE_1735_length_3391_cov_1.08579_ID_3283
NODE_1736_length_3388_cov_1.0696_ID_3287
NODE_1737_length_3387_cov_0.998192_ID_3289
NODE_1741_length_3385_cov_0.97497_ID_3295
NODE_1745_length_3376_cov_1.1766_ID_91511
NODE_1755_length_3363_cov_1.20704_ID_91967
NODE_1764_length_3350_cov_1.13411_ID_91759
NODE_1765_length_3349_cov_1.2311_ID_91907
NODE_1774_length_3341_cov_1.0813_ID_3349
NODE_1775_length_3340_cov_1.44176_ID_3351
NODE_1778_length_3336_cov_1.59014_ID_3537
NODE_1780_length_3334_cov_1.09801_ID_91703
NODE_1788_length_3324_cov_0.725653_ID_3375
NODE_1790_length_3323_cov_0.964044_ID_92301
NODE_1799_length_3316_cov_0.720357_ID_3395
NODE_1800_length_3315_cov_0.856131_ID_92025
NODE_1801_length_3315_cov_1.02834_ID_3397
NODE_1805_length_3307_cov_4.99846_ID_30789
NODE_1812_length_3295_cov_1.39213_ID_3419
NODE_1822_length_3284_cov_1.32659_ID_3435
NODE_1826_length_3280_cov_0.991591_ID_3441
NODE_1828_length_3276_cov_1.01029_ID_91477
NODE_1833_length_3270_cov_0.844111_ID_3455
NODE_1842_length_3252_cov_0.935281_ID_3467
NODE_1844_length_3245_cov_1.05542_ID_91725
NODE_1846_length_3242_cov_0.966278_ID_3473
NODE_1851_length_3239_cov_0.65142_ID_3483
NODE_1853_length_3236_cov_0.952952_ID_91951
NODE_1858_length_3228_cov_0.993669_ID_3495
NODE_1868_length_3217_cov_0.901525_ID_92307
NODE_1873_length_3206_cov_11.3178_ID_17455
NODE_1876_length_3202_cov_1.20428_ID_3523
NODE_1877_length_3200_cov_1.30949_ID_3525
NODE_1878_length_3198_cov_1.00192_ID_91885
NODE_1880_length_3196_cov_0.98369_ID_91281
NODE_1884_length_3190_cov_0.831785_ID_4881
NODE_1890_length_3181_cov_1.17159_ID_92229
NODE_1891_length_3180_cov_0.708775_ID_3551
NODE_1898_length_3174_cov_0.739775_ID_3565
NODE_1901_length_3170_cov_0.830377_ID_3569
NODE_1909_length_3157_cov_1.05084_ID_91201
NODE_1912_length_3153_cov_0.984436_ID_3589
NODE_191_length_30575_cov_1.10483_ID_373
NODE_1928_length_3134_cov_0.71615_ID_3619
NODE_1953_length_3098_cov_1.25256_ID_91553
NODE_1958_length_3093_cov_0.713624_ID_3671
NODE_1966_length_3080_cov_1.58087_ID_92245
NODE_1977_length_3067_cov_0.937959_ID_91855
NODE_1984_length_3061_cov_1.27306_ID_25011
NODE_1992_length_3049_cov_1.10805_ID_91687
NODE_1993_length_3048_cov_1.04062_ID_91285
NODE_1994_length_3045_cov_1.25706_ID_8421
NODE_1998_length_3041_cov_1.01144_ID_3739
NODE_2003_length_3034_cov_0.713322_ID_7853
NODE_2009_length_3023_cov_1.00914_ID_3757
NODE_2015_length_3013_cov_1.268_ID_91699
NODE_2020_length_3011_cov_1.09585_ID_91805
NODE_2021_length_3011_cov_1.15432_ID_3777
NODE_2024_length_2998_cov_0.728918_ID_92111
NODE_2028_length_2992_cov_1.16866_ID_92123
NODE_2035_length_2984_cov_0.830875_ID_3797
NODE_2036_length_2982_cov_1.07449_ID_3799
NODE_2039_length_2980_cov_0.702851_ID_3805
NODE_2042_length_2978_cov_0.840151_ID_91421
NODE_2044_length_2978_cov_0.819526_ID_92001
NODE_2046_length_2976_cov_0.823185_ID_3811
NODE_2051_length_2964_cov_0.887392_ID_3821
NODE_2077_length_2933_cov_1.20461_ID_3875
NODE_2079_length_2932_cov_1.0737_ID_91457
NODE_2086_length_2922_cov_0.961795_ID_91583
NODE_2091_length_2920_cov_1.08453_ID_3899
NODE_2104_length_2900_cov_1.29989_ID_3927
NODE_2106_length_2899_cov_0.999647_ID_91939
NODE_2114_length_2891_cov_1.09497_ID_91863
NODE_2140_length_2869_cov_0.992857_ID_5495
NODE_2141_length_2867_cov_1.13867_ID_3987
NODE_2142_length_2867_cov_0.843817_ID_91847
NODE_214_length_26749_cov_1.09284_ID_421
NODE_2154_length_2852_cov_0.696371_ID_91989
NODE_2156_length_2851_cov_0.985981_ID_91487
NODE_2165_length_2842_cov_0.948431_ID_4029
NODE_2173_length_2838_cov_1.21705_ID_92155
NODE_2177_length_2832_cov_0.863916_ID_4051
NODE_2181_length_2829_cov_0.897826_ID_91859
NODE_2183_length_2824_cov_1.07877_ID_4059
NODE_2194_length_2812_cov_1.01896_ID_4079
NODE_2200_length_2806_cov_0.846547_ID_91981
NODE_2207_length_2804_cov_0.956856_ID_4101
NODE_2208_length_2802_cov_1.10282_ID_91621
NODE_2211_length_2798_cov_0.631367_ID_4107
NODE_2215_length_2795_cov_1.13573_ID_91267
NODE_2226_length_2786_cov_0.878911_ID_91589
NODE_2230_length_2784_cov_0.816943_ID_91609
NODE_2251_length_2758_cov_0.764225_ID_91833
NODE_2263_length_2746_cov_1.14344_ID_91513
NODE_2288_length_2712_cov_1.30798_ID_91239
NODE_2298_length_2705_cov_0.919954_ID_92089
NODE_2301_length_2704_cov_1.25806_ID_4263
NODE_2302_length_2703_cov_0.900152_ID_4265
NODE_2303_length_2702_cov_1.57881_ID_91521
NODE_2313_length_2688_cov_1.05193_ID_4285
NODE_2318_length_2685_cov_1.48203_ID_4295
NODE_2319_length_2685_cov_0.900994_ID_4297
NODE_2331_length_2672_cov_1.15175_ID_91633
NODE_2333_length_2671_cov_1.09954_ID_4317
NODE_2345_length_2662_cov_1.17239_ID_4341
NODE_2347_length_2660_cov_0.861058_ID_92199
NODE_2355_length_2656_cov_0.815617_ID_4357
NODE_2356_length_2655_cov_0.649652_ID_4359
NODE_2358_length_2653_cov_0.885062_ID_4361
NODE_235_length_24290_cov_1.00326_ID_465
NODE_2362_length_2650_cov_0.968229_ID_92053
NODE_2370_length_2645_cov_0.906832_ID_92083
NODE_2382_length_2636_cov_1.14492_ID_91925
NODE_2383_length_2635_cov_1.19875_ID_4401
NODE_2390_length_2631_cov_0.844262_ID_4415
NODE_2397_length_2622_cov_0.93772_ID_4429
NODE_2398_length_2622_cov_0.728946_ID_91993
NODE_2412_length_2610_cov_0.85124_ID_91873
NODE_2413_length_2609_cov_0.825591_ID_4455
NODE_242_length_23160_cov_1.50756_ID_475
NODE_2430_length_2597_cov_0.966772_ID_4487
NODE_2432_length_2597_cov_0.99288_ID_4491
NODE_2436_length_2595_cov_0.85867_ID_91531
NODE_2438_length_2590_cov_0.696152_ID_91771
NODE_2441_length_2588_cov_1.11116_ID_7679
NODE_2444_length_2585_cov_1.06995_ID_4505
NODE_2454_length_2577_cov_1.27193_ID_92095
NODE_2463_length_2573_cov_1.23403_ID_91889
NODE_2469_length_2565_cov_0.921875_ID_92125
NODE_246_length_22859_cov_1.10825_ID_565
NODE_2470_length_2565_cov_0.964744_ID_4549
NODE_2471_length_2565_cov_1.08854_ID_92063
NODE_2475_length_2560_cov_0.707748_ID_4559
NODE_2476_length_2557_cov_1.17243_ID_91571
NODE_2482_length_2555_cov_1.27876_ID_91945
NODE_2485_length_2552_cov_0.88965_ID_91971
NODE_2492_length_2549_cov_1.1004_ID_91677
NODE_2493_length_2548_cov_0.815248_ID_4587
NODE_2504_length_2541_cov_1.17799_ID_91871
NODE_2509_length_2538_cov_1.07209_ID_13335
NODE_2520_length_2528_cov_1.16673_ID_4631
NODE_2535_length_2519_cov_1.1_ID_4655
NODE_2537_length_2515_cov_0.768602_ID_4659
NODE_2538_length_2513_cov_0.706219_ID_4661
NODE_2539_length_2513_cov_0.946399_ID_92291
NODE_2544_length_2509_cov_0.837705_ID_91785
NODE_2545_length_2508_cov_0.865109_ID_5657
NODE_2557_length_2498_cov_0.945245_ID_91533
NODE_2563_length_2495_cov_0.800495_ID_91849
NODE_2581_length_2481_cov_0.782338_ID_4731
NODE_2583_length_2479_cov_0.701245_ID_91959
NODE_2593_length_2475_cov_1.0345_ID_4753
NODE_2598_length_2472_cov_0.871411_ID_22739
NODE_2610_length_2463_cov_1.27277_ID_12627
NODE_2611_length_2461_cov_0.900502_ID_4785
NODE_2620_length_2456_cov_0.748638_ID_4803
NODE_2624_length_2455_cov_1.3223_ID_4809
NODE_2632_length_2447_cov_1.19512_ID_91579
NODE_2635_length_2445_cov_0.830387_ID_4829
NODE_2637_length_2445_cov_1.09764_ID_91203
NODE_263_length_21352_cov_1.29808_ID_513
NODE_2641_length_2443_cov_1.39132_ID_4839
NODE_2649_length_2439_cov_0.911392_ID_4855
NODE_2657_length_2435_cov_0.957735_ID_4869
NODE_2658_length_2435_cov_0.957312_ID_91969
NODE_2664_length_2431_cov_0.828959_ID_92081
NODE_2699_length_2401_cov_1.05703_ID_4945
NODE_2701_length_2400_cov_1.2707_ID_68447
NODE_2704_length_2395_cov_0.736457_ID_4953
NODE_2714_length_2389_cov_0.831034_ID_91413
NODE_2726_length_2376_cov_0.986129_ID_4989
NODE_2751_length_2359_cov_1.16507_ID_91469
NODE_2757_length_2355_cov_0.973316_ID_92067
NODE_2764_length_2353_cov_0.947898_ID_91921
NODE_2768_length_2350_cov_0.889084_ID_91831
NODE_2771_length_2346_cov_1.18094_ID_5073
NODE_2784_length_2337_cov_1.3858_ID_5
NODE_2797_length_2327_cov_0.80868_ID_5123
NODE_2800_length_2325_cov_0.725177_ID_5129
NODE_2804_length_2323_cov_0.819876_ID_5137
NODE_2805_length_2323_cov_1.02218_ID_5139
NODE_2814_length_2314_cov_1.21024_ID_5155
NODE_2818_length_2312_cov_1.037_ID_92049
NODE_2833_length_2303_cov_1.02328_ID_9017
NODE_2837_length_2301_cov_1.09901_ID_91495
NODE_2846_length_2295_cov_0.760557_ID_5211
NODE_2852_length_2287_cov_1.11812_ID_5225
NODE_2858_length_2285_cov_1.04558_ID_5237
NODE_2860_length_2283_cov_0.929539_ID_91803
NODE_2865_length_2282_cov_0.854948_ID_5249
NODE_2869_length_2279_cov_0.734842_ID_5257
NODE_2870_length_2279_cov_0.971493_ID_5259
NODE_2877_length_2275_cov_0.942883_ID_92247
NODE_2878_length_2275_cov_0.999093_ID_91935
NODE_2882_length_2273_cov_1.22368_ID_5279
NODE_2887_length_2270_cov_1.04861_ID_5289
NODE_2889_length_2268_cov_1.20236_ID_5293
NODE_2908_length_2259_cov_1.08174_ID_5331
NODE_2910_length_2258_cov_1.10553_ID_5335
NODE_2912_length_2257_cov_0.718921_ID_5339
NODE_2913_length_2256_cov_1.30681_ID_5341
NODE_2935_length_2247_cov_1.11387_ID_5381
NODE_2936_length_2247_cov_1.15519_ID_5383
NODE_2937_length_2247_cov_0.88292_ID_5385
NODE_2942_length_2245_cov_1.23713_ID_5395
NODE_2944_length_2244_cov_1.32598_ID_5399
NODE_2945_length_2244_cov_0.86069_ID_5401
NODE_2960_length_2236_cov_1.37794_ID_5427
NODE_2961_length_2234_cov_0.657275_ID_5429
NODE_2968_length_2231_cov_0.831637_ID_17385
NODE_2972_length_2230_cov_0.710319_ID_5449
NODE_2981_length_2223_cov_0.955896_ID_5467
NODE_3001_length_2214_cov_0.842424_ID_5509
NODE_3003_length_2214_cov_0.758042_ID_5513
NODE_3006_length_2214_cov_7.92494_ID_18899
NODE_3021_length_2209_cov_1.38879_ID_5545
NODE_3022_length_2206_cov_0.820309_ID_91585
NODE_3026_length_2206_cov_0.807674_ID_5553
NODE_3029_length_2203_cov_0.914246_ID_5559
NODE_3034_length_2199_cov_1.06526_ID_5569
NODE_3036_length_2198_cov_0.982621_ID_5573
NODE_3042_length_2195_cov_0.596425_ID_5585
NODE_3045_length_2193_cov_0.935499_ID_5591
NODE_3046_length_2192_cov_1.05323_ID_91373
NODE_3061_length_2186_cov_0.763817_ID_5621
NODE_3062_length_2186_cov_1.02173_ID_92069
NODE_3069_length_2178_cov_1.49218_ID_5637
NODE_3084_length_2172_cov_0.751783_ID_5669
NODE_3093_length_2167_cov_0.92469_ID_92243
NODE_3105_length_2162_cov_0.895843_ID_5709
NODE_3124_length_2151_cov_0.717099_ID_5749
NODE_3127_length_2151_cov_0.817963_ID_5755
NODE_3132_length_2149_cov_1.44038_ID_91673
NODE_3134_length_2147_cov_0.823869_ID_5767
NODE_3147_length_2139_cov_1.17633_ID_5789
NODE_3149_length_2137_cov_0.692456_ID_5793
NODE_3153_length_2136_cov_0.920174_ID_5801
NODE_3169_length_2130_cov_1.29743_ID_5829
NODE_3170_length_2129_cov_1.0165_ID_5831
NODE_3172_length_2128_cov_1.03108_ID_5835
NODE_3193_length_2116_cov_1.13825_ID_5877
NODE_3207_length_2109_cov_0.973039_ID_5905
NODE_3208_length_2108_cov_1.231_ID_5907
NODE_3209_length_2108_cov_1.00834_ID_5909
NODE_3212_length_2108_cov_0.801373_ID_5913
NODE_3230_length_2101_cov_1.01181_ID_5949
NODE_3233_length_2100_cov_0.645002_ID_92073
NODE_323_length_18018_cov_1.0624_ID_613
NODE_3242_length_2096_cov_0.833251_ID_5971
NODE_3245_length_2093_cov_0.630435_ID_5977
NODE_3252_length_2090_cov_1.28402_ID_25953
NODE_3266_length_2084_cov_0.991563_ID_6017
NODE_3270_length_2082_cov_1.06806_ID_6025
NODE_3271_length_2081_cov_0.874254_ID_13671
NODE_3278_length_2078_cov_0.883026_ID_91343
NODE_3281_length_2075_cov_0.868395_ID_6039
NODE_3282_length_2075_cov_1.27218_ID_6041
NODE_3283_length_2074_cov_1.199_ID_6043
NODE_3293_length_2070_cov_1.11544_ID_69353
NODE_3297_length_2069_cov_1.054_ID_6063
NODE_3300_length_2067_cov_0.875375_ID_6069
NODE_3312_length_2062_cov_0.811841_ID_91251
NODE_3332_length_2055_cov_1.09063_ID_6129
NODE_3344_length_2048_cov_0.836786_ID_91721
NODE_3346_length_2048_cov_0.884285_ID_6155
NODE_3350_length_2047_cov_1.19717_ID_6163
NODE_3351_length_2046_cov_1.11229_ID_6165
NODE_3353_length_2045_cov_1.09717_ID_6169
NODE_3355_length_2044_cov_0.865823_ID_92181
NODE_3359_length_2040_cov_0.707763_ID_91961
NODE_3362_length_2038_cov_0.758253_ID_6183
NODE_3373_length_2035_cov_1.56968_ID_6205
NODE_3404_length_2023_cov_1.15558_ID_6265
NODE_3408_length_2022_cov_0.792627_ID_6271
NODE_3409_length_2021_cov_0.963115_ID_6273
NODE_3411_length_2021_cov_1.74795_ID_20667
NODE_3439_length_2012_cov_1.13073_ID_6331
NODE_3446_length_2010_cov_0.78001_ID_6345
NODE_3448_length_2008_cov_1.06086_ID_91425
NODE_3463_length_2003_cov_1.33402_ID_6377
NODE_3465_length_2001_cov_1.04451_ID_23595
NODE_3467_length_2001_cov_1.00259_ID_6383
NODE_3472_length_2000_cov_0.865873_ID_6393
NODE_3475_length_1999_cov_1.25803_ID_6399
NODE_3477_length_1998_cov_1.32815_ID_6403
NODE_3479_length_1997_cov_1.10373_ID_6407
NODE_3482_length_1997_cov_1.03942_ID_6411
NODE_3497_length_1988_cov_1.09432_ID_91339
NODE_349_length_16348_cov_0.951963_ID_659
NODE_3502_length_1987_cov_1.13556_ID_6447
NODE_3506_length_1985_cov_0.93737_ID_6455
NODE_3507_length_1985_cov_1.10073_ID_6457
NODE_3513_length_1981_cov_0.983264_ID_6467
NODE_3520_length_1978_cov_0.743321_ID_6481
NODE_3528_length_1977_cov_0.774109_ID_6497
NODE_3532_length_1976_cov_0.77032_ID_6505
NODE_3552_length_1968_cov_0.841496_ID_91443
NODE_3559_length_1965_cov_1.08228_ID_6555
NODE_3560_length_1964_cov_0.717678_ID_6557
NODE_3571_length_1960_cov_0.843469_ID_6579
NODE_3574_length_1958_cov_1.25463_ID_6585
NODE_3579_length_1957_cov_0.855932_ID_22577
NODE_3583_length_1956_cov_1.11447_ID_6601
NODE_3588_length_1953_cov_1.14703_ID_6613
NODE_3591_length_1951_cov_0.994155_ID_6619
NODE_3593_length_1950_cov_0.897927_ID_6623
NODE_3595_length_1949_cov_0.848404_ID_6627
NODE_3612_length_1944_cov_0.717333_ID_6661
NODE_3636_length_1935_cov_0.839228_ID_6709
NODE_3638_length_1933_cov_0.708691_ID_6713
NODE_3639_length_1933_cov_1.18187_ID_92109
NODE_3643_length_1932_cov_1.22813_ID_6721
NODE_3657_length_1926_cov_1.36995_ID_6747
NODE_3667_length_1921_cov_0.676026_ID_6765
NODE_3669_length_1920_cov_0.718531_ID_6769
NODE_3678_length_1916_cov_0.768814_ID_6787
NODE_3680_length_1912_cov_1.48671_ID_6789
NODE_3692_length_1909_cov_1.14239_ID_92259
NODE_3697_length_1908_cov_1.07178_ID_17555
NODE_370_length_15546_cov_1.18214_ID_701
NODE_3716_length_1902_cov_1.43426_ID_91197
NODE_3735_length_1896_cov_1.06349_ID_6887
NODE_3738_length_1895_cov_0.92552_ID_6893
NODE_3742_length_1894_cov_1.12767_ID_26673
NODE_3743_length_1893_cov_1.16557_ID_91489
NODE_3767_length_1886_cov_0.818932_ID_6945
NODE_3780_length_1882_cov_0.960838_ID_6969
NODE_3806_length_1872_cov_1.13256_ID_7019
NODE_3819_length_1868_cov_0.890495_ID_7045
NODE_3822_length_1868_cov_0.903835_ID_7051
NODE_3834_length_1865_cov_0.922606_ID_7075
NODE_3835_length_1865_cov_1.21993_ID_91681
NODE_385_length_15083_cov_0.94252_ID_727
NODE_3873_length_1851_cov_0.939394_ID_1329
NODE_3874_length_1851_cov_0.753086_ID_7151
NODE_3886_length_1849_cov_1.08708_ID_92283
NODE_3906_length_1843_cov_1.02198_ID_7213
NODE_3923_length_1835_cov_1.02039_ID_7247
NODE_3927_length_1834_cov_0.735977_ID_7255
NODE_3934_length_1832_cov_0.913216_ID_7269
NODE_3936_length_1830_cov_0.91766_ID_7273
NODE_3947_length_1827_cov_1.03072_ID_7295
NODE_3951_length_1826_cov_1.0757_ID_7303
NODE_3956_length_1824_cov_0.874074_ID_7313
NODE_3957_length_1824_cov_1.37094_ID_21
NODE_3959_length_1823_cov_1.02109_ID_7317
NODE_395_length_14752_cov_1.03017_ID_745
NODE_3961_length_1822_cov_0.758699_ID_7321
NODE_3965_length_1822_cov_0.928694_ID_38725
NODE_3978_length_1818_cov_0.971412_ID_91387
NODE_3979_length_1818_cov_0.966838_ID_7351
NODE_3985_length_1815_cov_0.800687_ID_7363
NODE_3986_length_1815_cov_1.36426_ID_7365
NODE_3988_length_1813_cov_0.875_ID_7369
NODE_3999_length_1811_cov_0.779564_ID_7391
NODE_4000_length_1811_cov_0.97876_ID_7393
NODE_4021_length_1807_cov_0.551784_ID_7435
NODE_4037_length_1802_cov_1.22793_ID_7467
NODE_4048_length_1799_cov_0.957803_ID_7489
NODE_4063_length_1795_cov_0.77752_ID_7517
NODE_4069_length_1794_cov_1.09797_ID_7529
NODE_4075_length_1792_cov_1.06907_ID_7541
NODE_407_length_14069_cov_1.0615_ID_1013
NODE_4081_length_1790_cov_0.88437_ID_92055
NODE_4102_length_1785_cov_1.14569_ID_7591
NODE_4109_length_1782_cov_1.14478_ID_7605
NODE_4122_length_1779_cov_0.770175_ID_7629
NODE_4125_length_1778_cov_0.723815_ID_7635
NODE_4148_length_1770_cov_1.35979_ID_91913
NODE_4153_length_1769_cov_0.853529_ID_7689
NODE_4169_length_1765_cov_0.574292_ID_91865
NODE_4181_length_1762_cov_1.27702_ID_7743
NODE_4182_length_1762_cov_1.00473_ID_7745
NODE_4195_length_1757_cov_1.11611_ID_7769
NODE_4199_length_1755_cov_0.664294_ID_7777
NODE_4200_length_1755_cov_1.27224_ID_7779
NODE_4215_length_1750_cov_1.36585_ID_7807
NODE_4219_length_1749_cov_1.06845_ID_7815
NODE_4224_length_1747_cov_0.871275_ID_7825
NODE_422_length_13394_cov_1.11235_ID_899
NODE_4238_length_1742_cov_1.22355_ID_7855
NODE_4239_length_1742_cov_0.790795_ID_7857
NODE_4240_length_1742_cov_0.911536_ID_7859
NODE_4251_length_1738_cov_0.93589_ID_7881
NODE_4256_length_1736_cov_1.0108_ID_7891
NODE_4267_length_1732_cov_0.948888_ID_7913
NODE_4271_length_1732_cov_1.38485_ID_91635
NODE_4275_length_1731_cov_1.05054_ID_7927
NODE_4289_length_1726_cov_1.21364_ID_7955
NODE_4290_length_1725_cov_1.00785_ID_7957
NODE_4293_length_1725_cov_1.52597_ID_7963
NODE_4297_length_1724_cov_0.850755_ID_7971
NODE_4318_length_1719_cov_1.34364_ID_8011
NODE_4333_length_1715_cov_0.998785_ID_8037
NODE_4337_length_1714_cov_1.11246_ID_91509
NODE_4340_length_1713_cov_0.940389_ID_8049
NODE_4342_length_1713_cov_0.955596_ID_8053
NODE_434_length_13056_cov_0.999923_ID_827
NODE_4365_length_1706_cov_0.656689_ID_91697
NODE_4367_length_1705_cov_1.09046_ID_91439
NODE_4375_length_1703_cov_1.16646_ID_8115
NODE_4377_length_1702_cov_0.913656_ID_8119
NODE_4380_length_1702_cov_0.90692_ID_8125
NODE_4381_length_1702_cov_0.808941_ID_8127
NODE_4382_length_1701_cov_1.30086_ID_91401
NODE_4389_length_1700_cov_1.00061_ID_8141
NODE_4393_length_1699_cov_1.1_ID_8149
NODE_4402_length_1695_cov_1.03998_ID_8169
NODE_4409_length_1693_cov_0.7617_ID_8183
NODE_441_length_12895_cov_1.02355_ID_841
NODE_4428_length_1687_cov_0.765142_ID_8221
NODE_4436_length_1684_cov_1.03963_ID_8237
NODE_4446_length_1681_cov_0.907568_ID_8257
NODE_4448_length_1681_cov_1.16501_ID_8261
NODE_4459_length_1677_cov_0.708333_ID_8283
NODE_445_length_12832_cov_1.03573_ID_867
NODE_4465_length_1675_cov_2.89041_ID_13241
NODE_4476_length_1672_cov_0.994386_ID_8315
NODE_4521_length_1660_cov_0.691389_ID_8403
NODE_4528_length_1659_cov_1.30818_ID_8417
NODE_4529_length_1658_cov_1.01762_ID_8419
NODE_453_length_12501_cov_1.05566_ID_855
NODE_4548_length_1655_cov_1.1425_ID_31711
NODE_4549_length_1654_cov_1.27445_ID_8455
NODE_4558_length_1652_cov_0.88566_ID_8473
NODE_4559_length_1652_cov_0.961466_ID_8475
NODE_4560_length_1651_cov_0.837547_ID_8477
NODE_4581_length_1645_cov_1.08249_ID_8519
NODE_4598_length_1641_cov_0.881043_ID_8555
NODE_4603_length_1640_cov_0.832591_ID_46391
NODE_4607_length_1639_cov_0.659873_ID_8571
NODE_4620_length_1636_cov_1.12699_ID_8597
NODE_462_length_12049_cov_1.02346_ID_1283
NODE_463_length_12031_cov_1.01848_ID_879
NODE_4644_length_1630_cov_1.32671_ID_91755
NODE_4671_length_1624_cov_0.830868_ID_8701
NODE_4672_length_1624_cov_0.979421_ID_8703
NODE_4675_length_1623_cov_0.882883_ID_91295
NODE_4682_length_1621_cov_1.02964_ID_8721
NODE_4694_length_1619_cov_1.29161_ID_8743
NODE_4696_length_1618_cov_2.16656_ID_91765
NODE_4705_length_1617_cov_1.10207_ID_8763
NODE_4706_length_1615_cov_0.582794_ID_8765
NODE_4714_length_1614_cov_1.02395_ID_8781
NODE_4720_length_1613_cov_1.30764_ID_91483
NODE_4721_length_1612_cov_0.826312_ID_8793
NODE_4732_length_1610_cov_1.01557_ID_8813
NODE_4747_length_1608_cov_0.879142_ID_8843
NODE_474_length_11779_cov_1.06763_ID_901
NODE_4756_length_1604_cov_0.960261_ID_8861
NODE_4761_length_1602_cov_1.26288_ID_35689
NODE_4770_length_1600_cov_1.25016_ID_92115
NODE_4774_length_1599_cov_1.28366_ID_8893
NODE_4785_length_1597_cov_1.10471_ID_8917
NODE_4790_length_1596_cov_0.822528_ID_92255
NODE_479_length_11696_cov_0.959835_ID_909
NODE_480_length_11686_cov_1.08436_ID_1491
NODE_4810_length_1589_cov_0.986184_ID_8963
NODE_4823_length_1587_cov_0.959157_ID_8989
NODE_4838_length_1583_cov_1.04557_ID_9023
NODE_4854_length_1581_cov_0.922619_ID_2973
NODE_4858_length_1580_cov_1.13302_ID_9065
NODE_4864_length_1578_cov_1.08085_ID_9077
NODE_4879_length_1574_cov_0.929568_ID_9103
NODE_4892_length_1571_cov_0.876165_ID_9129
NODE_4894_length_1571_cov_0.851531_ID_9133
NODE_4907_length_1567_cov_0.787717_ID_9157
NODE_4919_length_1565_cov_1.36631_ID_91485
NODE_4935_length_1562_cov_0.868051_ID_91501
NODE_4974_length_1553_cov_0.636119_ID_9287
NODE_4980_length_1552_cov_0.840863_ID_9299
NODE_4990_length_1551_cov_0.704453_ID_9319
NODE_4999_length_1548_cov_0.858688_ID_9335
NODE_5010_length_1546_cov_1.05552_ID_9355
NODE_5012_length_1546_cov_0.735274_ID_9361
NODE_5040_length_1539_cov_0.82585_ID_9415
NODE_5042_length_1539_cov_0.82517_ID_26153
NODE_5062_length_1534_cov_0.891468_ID_9455
NODE_5079_length_1532_cov_0.642515_ID_91395
NODE_5083_length_1531_cov_0.994528_ID_9495
NODE_5096_length_1527_cov_0.66118_ID_9521
NODE_511_length_10958_cov_1.2711_ID_961
NODE_5125_length_1523_cov_1.08872_ID_9579
NODE_5139_length_1521_cov_0.839532_ID_9607
NODE_5153_length_1519_cov_1.22_ID_91689
NODE_5168_length_1516_cov_0.941949_ID_9663
NODE_516_length_10863_cov_1.21762_ID_1241
NODE_5175_length_1514_cov_1.28581_ID_9679
NODE_5178_length_1513_cov_0.718144_ID_9685
NODE_5196_length_1510_cov_1.10271_ID_9721
NODE_5204_length_1508_cov_0.662265_ID_9737
NODE_5212_length_1505_cov_1.08774_ID_9753
NODE_5229_length_1502_cov_0.76134_ID_9783
NODE_5237_length_1501_cov_1.20042_ID_91573
NODE_5257_length_1497_cov_0.785014_ID_9835
NODE_5268_length_1495_cov_0.960028_ID_9857
NODE_526_length_10770_cov_1.25203_ID_979
NODE_5291_length_1492_cov_0.96416_ID_91747
NODE_5302_length_1490_cov_0.707952_ID_9921
NODE_5318_length_1485_cov_0.871469_ID_91543
NODE_532_length_10662_cov_0.979232_ID_1111
NODE_5337_length_1481_cov_1.38102_ID_9989
NODE_5339_length_1480_cov_0.990078_ID_9993
NODE_5354_length_1477_cov_1.04616_ID_10023
NODE_5357_length_1476_cov_0.995736_ID_92101
NODE_5373_length_1474_cov_1.07829_ID_10061
NODE_5381_length_1472_cov_0.704918_ID_10077
NODE_5405_length_1466_cov_0.520401_ID_10125
NODE_5408_length_1466_cov_1.27416_ID_10131
NODE_540_length_10540_cov_1.44036_ID_1555
NODE_5416_length_1464_cov_1.2172_ID_10147
NODE_5418_length_1464_cov_0.966308_ID_10151
NODE_5428_length_1462_cov_1.17014_ID_10171
NODE_5437_length_1461_cov_0.798132_ID_10189
NODE_543_length_10410_cov_0.947297_ID_1015
NODE_5450_length_1457_cov_0.972622_ID_10215
NODE_5453_length_1457_cov_0.933718_ID_10221
NODE_5457_length_1457_cov_0.706052_ID_10229
NODE_546_length_10377_cov_1.03929_ID_1023
NODE_5504_length_1450_cov_1.01521_ID_10323
NODE_5508_length_1449_cov_0.638406_ID_10331
NODE_5523_length_1445_cov_1.34157_ID_15551
NODE_555_length_10122_cov_0.893166_ID_1047
NODE_5571_length_1437_cov_0.909357_ID_10449
NODE_5572_length_1437_cov_1.4481_ID_10451
NODE_5575_length_1436_cov_1.40673_ID_10457
NODE_5596_length_1434_cov_1.10623_ID_10497
NODE_559_length_10100_cov_1.02881_ID_1365
NODE_5625_length_1429_cov_0.705147_ID_92009
NODE_5626_length_1429_cov_0.765441_ID_10557
NODE_5631_length_1429_cov_0.763971_ID_10567
NODE_5648_length_1426_cov_0.771555_ID_10601
NODE_5664_length_1424_cov_1.01993_ID_10631
NODE_566_length_9978_cov_0.891816_ID_1215
NODE_5675_length_1422_cov_0.923134_ID_91669
NODE_5676_length_1422_cov_0.944568_ID_92173
NODE_5686_length_1420_cov_0.618061_ID_10669
NODE_5697_length_1418_cov_0.832468_ID_10693
NODE_569_length_9922_cov_2.63321_ID_1217
NODE_5720_length_1414_cov_0.773978_ID_91377
NODE_5727_length_1412_cov_0.817573_ID_10749
NODE_5734_length_1411_cov_1.04993_ID_10763
NODE_5746_length_1408_cov_0.674384_ID_10793
NODE_5766_length_1405_cov_0.91018_ID_91291
NODE_5768_length_1404_cov_1.23071_ID_10837
NODE_5774_length_1403_cov_1.11019_ID_10849
NODE_5812_length_1397_cov_0.903614_ID_10923
NODE_5814_length_1397_cov_0.837349_ID_10927
NODE_5817_length_1396_cov_0.45893_ID_10933
NODE_5830_length_1393_cov_0.814955_ID_10959
NODE_5844_length_1391_cov_0.860061_ID_10987
NODE_5858_length_1388_cov_1.17665_ID_11009
NODE_5879_length_1385_cov_1.01748_ID_11051
NODE_5889_length_1384_cov_1.33916_ID_11071
NODE_588_length_9602_cov_0.934648_ID_1621
NODE_592_length_9569_cov_1.04853_ID_1105
NODE_5972_length_1370_cov_0.897002_ID_11237
NODE_5981_length_1368_cov_1.05543_ID_91637
NODE_5985_length_1367_cov_0.712635_ID_11261
NODE_5991_length_1366_cov_1.27679_ID_11273
NODE_5994_length_1365_cov_0.881944_ID_11279
NODE_5997_length_1365_cov_0.685957_ID_11285
NODE_6002_length_1364_cov_1.16371_ID_91283
NODE_6020_length_1362_cov_0.83372_ID_11321
NODE_6021_length_1361_cov_0.644737_ID_11323
NODE_6029_length_1360_cov_0.930287_ID_11339
NODE_6050_length_1356_cov_1.02953_ID_91795
NODE_6057_length_1354_cov_0.880934_ID_11395
NODE_6077_length_1351_cov_1.10686_ID_11435
NODE_60_length_85027_cov_1.04941_ID_115
NODE_6100_length_1348_cov_0.70602_ID_11479
NODE_6105_length_1347_cov_1.24257_ID_11487
NODE_6113_length_1346_cov_0.924824_ID_11501
NODE_6120_length_1345_cov_1.14498_ID_11515
NODE_617_length_9015_cov_1.32428_ID_1153
NODE_6203_length_1331_cov_0.998415_ID_11675
NODE_6205_length_1331_cov_0.847068_ID_11679
NODE_6211_length_1330_cov_0.724822_ID_11691
NODE_6220_length_1329_cov_1.3119_ID_11709
NODE_6230_length_1328_cov_1.17236_ID_91383
NODE_6238_length_1326_cov_1.45426_ID_11741
NODE_6242_length_1326_cov_1.08751_ID_11749
NODE_6265_length_1323_cov_0.813397_ID_11795
NODE_6271_length_1322_cov_0.809258_ID_11805
NODE_6281_length_1321_cov_1.05192_ID_11825
NODE_6302_length_1318_cov_1.34508_ID_11867
NODE_6304_length_1318_cov_0.445156_ID_11871
NODE_6312_length_1317_cov_0.9375_ID_11883
NODE_6321_length_1316_cov_0.840417_ID_11901
NODE_6323_length_1316_cov_0.940658_ID_11905
NODE_6332_length_1314_cov_1.28755_ID_11923
NODE_6334_length_1314_cov_0.919679_ID_91369
NODE_6344_length_1312_cov_0.671762_ID_11945
NODE_6377_length_1309_cov_0.767742_ID_12011
NODE_6379_length_1309_cov_1.24597_ID_16433
NODE_6383_length_1308_cov_1.40678_ID_12021
NODE_6386_length_1308_cov_0.747377_ID_12027
NODE_6391_length_1307_cov_0.879645_ID_92065
NODE_639_length_8716_cov_1.19602_ID_1197
NODE_6401_length_1305_cov_1.2678_ID_12053
NODE_6421_length_1302_cov_0.629359_ID_91813
NODE_6436_length_1301_cov_1.05601_ID_12117
NODE_6481_length_1294_cov_1.15102_ID_12207
NODE_648_length_8589_cov_0.969484_ID_1795
NODE_6510_length_1288_cov_1.3347_ID_12265
NODE_6534_length_1284_cov_0.855144_ID_60949
NODE_6535_length_1284_cov_0.902058_ID_12313
NODE_6543_length_1283_cov_1.17381_ID_12329
NODE_6544_length_1283_cov_0.864909_ID_91937
NODE_6548_length_1283_cov_1.00082_ID_12337
NODE_6553_length_1282_cov_0.754328_ID_12347
NODE_6560_length_1281_cov_0.761551_ID_12361
NODE_6573_length_1279_cov_0.796694_ID_12387
NODE_6578_length_1279_cov_0.889256_ID_12397
NODE_6581_length_1279_cov_1.08182_ID_17493
NODE_6616_length_1274_cov_1.05062_ID_12475
NODE_6619_length_1274_cov_1.00083_ID_12481
NODE_6627_length_1273_cov_0.983389_ID_92251
NODE_6629_length_1273_cov_0.686877_ID_12499
NODE_6643_length_1272_cov_0.82793_ID_12527
NODE_6645_length_1271_cov_0.673877_ID_12531
NODE_6648_length_1271_cov_1.25707_ID_91367
NODE_6678_length_1265_cov_0.861204_ID_12595
NODE_6687_length_1264_cov_0.753138_ID_12613
NODE_6703_length_1263_cov_0.952261_ID_28923
NODE_672_length_8400_cov_0.939143_ID_1529
NODE_6737_length_1259_cov_0.676471_ID_12709
NODE_6764_length_1256_cov_0.64027_ID_12763
NODE_677_length_8337_cov_1.15941_ID_1427
NODE_6783_length_1254_cov_0.730802_ID_12801
NODE_6801_length_1252_cov_0.874049_ID_12835
NODE_6828_length_1250_cov_0.779848_ID_12889
NODE_6869_length_1243_cov_0.702726_ID_12969
NODE_6885_length_1240_cov_1.01281_ID_13001
NODE_6891_length_1239_cov_0.686325_ID_24401
NODE_6904_length_1238_cov_0.961506_ID_13035
NODE_6919_length_1236_cov_0.927164_ID_13063
NODE_6928_length_1235_cov_0.831904_ID_13081
NODE_6935_length_1234_cov_0.777682_ID_13095
NODE_693_length_8175_cov_0.85813_ID_1311
NODE_6957_length_1232_cov_1.03525_ID_13135
NODE_6964_length_1231_cov_0.898451_ID_91375
NODE_6971_length_1230_cov_1.02756_ID_91411
NODE_6976_length_1230_cov_0.932817_ID_13167
NODE_6977_length_1230_cov_0.926787_ID_13169
NODE_6996_length_1227_cov_1.01468_ID_13207
NODE_7000_length_1225_cov_0.656574_ID_13215
NODE_7008_length_1225_cov_1.52163_ID_23031
NODE_7011_length_1224_cov_0.798268_ID_13235
NODE_7014_length_1224_cov_0.92381_ID_91205
NODE_7027_length_1222_cov_0.94536_ID_13263
NODE_704_length_8007_cov_1.22058_ID_633
NODE_7073_length_1215_cov_0.722513_ID_13355
NODE_7084_length_1214_cov_1.05852_ID_13377
NODE_7086_length_1213_cov_0.721154_ID_13381
NODE_7091_length_1213_cov_0.77972_ID_13391
NODE_7104_length_1212_cov_2.55643_ID_16657
NODE_7113_length_1211_cov_0.929072_ID_13433
NODE_7132_length_1208_cov_0.804214_ID_43895
NODE_7152_length_1206_cov_1.10554_ID_13513
NODE_7153_length_1206_cov_1.36324_ID_91331
NODE_7160_length_1205_cov_0.955106_ID_92189
NODE_7162_length_1205_cov_1.17518_ID_13529
NODE_7192_length_1201_cov_0.818905_ID_13589
NODE_7202_length_1199_cov_0.970796_ID_13609
NODE_7210_length_1198_cov_0.465899_ID_13625
NODE_7229_length_1196_cov_1.00976_ID_13661
NODE_7232_length_1195_cov_1.05684_ID_13667
NODE_7261_length_1192_cov_0.950134_ID_13727
NODE_7279_length_1190_cov_1.04193_ID_13761
NODE_7310_length_1187_cov_0.570662_ID_91433
NODE_733_length_7747_cov_1.08974_ID_1385
NODE_7343_length_1183_cov_0.765709_ID_13887
NODE_7359_length_1181_cov_0.745504_ID_13919
NODE_7366_length_1180_cov_0.790279_ID_13933
NODE_738_length_7716_cov_0.799791_ID_1391
NODE_7391_length_1176_cov_0.96477_ID_13979
NODE_7402_length_1175_cov_1.65009_ID_49983
NODE_7403_length_1175_cov_0.871609_ID_14001
NODE_7404_length_1175_cov_1.04792_ID_14003
NODE_7422_length_1173_cov_1.58514_ID_91303
NODE_7426_length_1172_cov_0.677244_ID_14045
NODE_7450_length_1169_cov_1.50727_ID_14093
NODE_7467_length_1167_cov_0.481785_ID_14125
NODE_7478_length_1165_cov_0.761861_ID_14147
NODE_7482_length_1164_cov_1.17626_ID_14155
NODE_749_length_7538_cov_0.772928_ID_1419
NODE_7500_length_1162_cov_1.29186_ID_14189
NODE_7502_length_1162_cov_1.03477_ID_14193
NODE_7506_length_1161_cov_0.979853_ID_14201
NODE_7517_length_1160_cov_0.586618_ID_14223
NODE_7519_length_1160_cov_1.02383_ID_14227
NODE_7549_length_1157_cov_0.932904_ID_14285
NODE_754_length_7501_cov_3.36289_ID_1743
NODE_7550_length_1157_cov_0.840993_ID_14287
NODE_7558_length_1156_cov_1.092_ID_14303
NODE_7567_length_1155_cov_0.86372_ID_14321
NODE_7590_length_1152_cov_0.692521_ID_14365
NODE_760_length_7455_cov_1.16301_ID_1439
NODE_7618_length_1149_cov_0.346296_ID_14423
NODE_7620_length_1149_cov_1.16852_ID_14427
NODE_7631_length_1147_cov_0.906308_ID_14449
NODE_7632_length_1147_cov_0.975881_ID_281
NODE_7636_length_1147_cov_1.13451_ID_92171
NODE_7646_length_1146_cov_0.867224_ID_14477
NODE_7659_length_1144_cov_0.92186_ID_14501
NODE_7665_length_1144_cov_1.1693_ID_14513
NODE_7681_length_1143_cov_1.02142_ID_34915
NODE_7693_length_1140_cov_1.23436_ID_14567
NODE_7721_length_1137_cov_0.801498_ID_14623
NODE_7777_length_1132_cov_1.07526_ID_14733
NODE_7783_length_1131_cov_1.01318_ID_14745
NODE_7797_length_1130_cov_1.07729_ID_14773
NODE_7798_length_1129_cov_0.870755_ID_14775
NODE_7823_length_1127_cov_1.08979_ID_14823
NODE_7829_length_1127_cov_0.648393_ID_14835
NODE_782_length_7176_cov_1.02491_ID_1485
NODE_7846_length_1126_cov_1.26585_ID_14867
NODE_7912_length_1118_cov_0.825548_ID_15001
NODE_7916_length_1117_cov_0.730916_ID_91915
NODE_7932_length_1116_cov_1.01146_ID_15035
NODE_7935_length_1115_cov_0.435946_ID_15041
NODE_7951_length_1114_cov_0.760766_ID_15071
NODE_7957_length_1113_cov_1.05268_ID_15083
NODE_7962_length_1113_cov_1.11877_ID_15093
NODE_7963_length_1113_cov_1.18966_ID_15095
NODE_7976_length_1112_cov_1.08341_ID_15121
NODE_7984_length_1111_cov_1.29846_ID_15137
NODE_7992_length_1110_cov_0.673391_ID_15153
NODE_799_length_7048_cov_1.06906_ID_1517
NODE_8002_length_1109_cov_0.896154_ID_15173
NODE_8027_length_1105_cov_0.75_ID_15223
NODE_805_length_7008_cov_0.813085_ID_1535
NODE_8068_length_1102_cov_0.985479_ID_15305
NODE_807_length_7001_cov_1.49538_ID_1539
NODE_8089_length_1099_cov_1.2_ID_11151
NODE_808_length_7000_cov_0.951089_ID_1541
NODE_8095_length_1098_cov_1.18076_ID_15359
NODE_8096_length_1098_cov_1.05442_ID_15361
NODE_8104_length_1097_cov_0.836576_ID_91953
NODE_8114_length_1096_cov_0.746835_ID_15395
NODE_8115_length_1096_cov_0.927945_ID_91769
NODE_811_length_6973_cov_0.76434_ID_1547
NODE_8122_length_1095_cov_0.825536_ID_15409
NODE_8132_length_1094_cov_0.8_ID_15429
NODE_8134_length_1093_cov_1.45508_ID_33753
NODE_816_length_6936_cov_1.24043_ID_1559
NODE_8193_length_1088_cov_0.902846_ID_15549
NODE_8197_length_1087_cov_0.935167_ID_15559
NODE_8213_length_1086_cov_0.396264_ID_55071
NODE_822_length_6908_cov_0.943413_ID_1569
NODE_8240_length_1084_cov_0.582266_ID_15639
NODE_8250_length_1083_cov_1.02564_ID_91781
NODE_8260_length_1082_cov_1.11945_ID_15673
NODE_8274_length_1081_cov_0.597826_ID_15701
NODE_8294_length_1078_cov_0.865213_ID_15741
NODE_8319_length_1075_cov_0.824056_ID_15789
NODE_8332_length_1074_cov_0.762189_ID_23953
NODE_834_length_6811_cov_1.30688_ID_1597
NODE_8354_length_1072_cov_0.472582_ID_15855
NODE_8360_length_1072_cov_1.32702_ID_15867
NODE_8362_length_1072_cov_1.12562_ID_15871
NODE_8385_length_1069_cov_0.53_ID_15917
NODE_8398_length_1067_cov_1.16232_ID_15943
NODE_8403_length_1067_cov_0.745491_ID_15953
NODE_8456_length_1064_cov_1.32965_ID_16057
NODE_8464_length_1063_cov_1.02515_ID_91535
NODE_8475_length_1062_cov_0.748238_ID_16093
NODE_8484_length_1061_cov_0.727823_ID_16111
NODE_8491_length_1061_cov_0.804435_ID_16125
NODE_8498_length_1060_cov_0.628658_ID_16139
NODE_8508_length_1059_cov_0.679798_ID_16157
NODE_850_length_6656_cov_1.44254_ID_1619
NODE_852_length_6604_cov_0.993726_ID_3863
NODE_8539_length_1056_cov_0.597771_ID_16217
NODE_8548_length_1055_cov_1.08114_ID_92145
NODE_8549_length_1055_cov_0.694726_ID_16235
NODE_8550_length_1055_cov_0.827586_ID_16237
NODE_8559_length_1054_cov_0.626396_ID_16255
NODE_8573_length_1053_cov_0.919715_ID_16283
NODE_860_length_6555_cov_0.871261_ID_1641
NODE_8657_length_1046_cov_0.664278_ID_16453
NODE_8661_length_1046_cov_1.25691_ID_16461
NODE_8680_length_1044_cov_1.0359_ID_16501
NODE_8687_length_1043_cov_0.495893_ID_16513
NODE_8695_length_1043_cov_1.12834_ID_16529
NODE_8697_length_1043_cov_1.18275_ID_16533
NODE_869_length_6486_cov_1.03366_ID_1657
NODE_8702_length_1043_cov_1.04107_ID_16541
NODE_8706_length_1042_cov_0.75334_ID_16547
NODE_8728_length_1040_cov_0.972194_ID_91723
NODE_8755_length_1038_cov_0.759546_ID_91661
NODE_8759_length_1038_cov_0.676987_ID_16647
NODE_878_length_6409_cov_1.20174_ID_1677
NODE_8817_length_1033_cov_1.53942_ID_16761
NODE_8833_length_1031_cov_0.795218_ID_16793
NODE_8844_length_1031_cov_1.01767_ID_91207
NODE_8865_length_1029_cov_1.48125_ID_16851
NODE_8877_length_1028_cov_1.00209_ID_16875
NODE_8886_length_1027_cov_0.586639_ID_16893
NODE_8937_length_1023_cov_1.28512_ID_16993
NODE_8950_length_1022_cov_0.759706_ID_17019
NODE_8983_length_1018_cov_1.08325_ID_17081
NODE_8992_length_1018_cov_0.915701_ID_17097
NODE_900_length_6262_cov_1.11981_ID_1723
NODE_9036_length_1015_cov_0.716702_ID_91279
NODE_9046_length_1013_cov_0.592161_ID_17199
NODE_9074_length_1010_cov_0.783209_ID_17253
NODE_9077_length_1010_cov_0.652497_ID_17259
NODE_9079_length_1010_cov_0.539851_ID_17263
NODE_9084_length_1010_cov_0.935175_ID_17271
NODE_9093_length_1010_cov_0.88204_ID_17287
NODE_9107_length_1008_cov_1.1459_ID_17315
NODE_913_length_6144_cov_1.04461_ID_1755
NODE_9143_length_1006_cov_1.0587_ID_17389
NODE_9183_length_1002_cov_0.508039_ID_17471
NODE_9197_length_1001_cov_1.14378_ID_17501
NODE_9204_length_1001_cov_1.06867_ID_17515
NODE_922_length_6070_cov_1.05449_ID_1775
NODE_925_length_6046_cov_1.12782_ID_2171
NODE_929_length_6012_cov_1.01851_ID_1787
NODE_946_length_5893_cov_1.4169_ID_1819
NODE_949_length_5879_cov_0.996213_ID_1823
NODE_964_length_5754_cov_1.23641_ID_1853
NODE_983_length_5664_cov_0.909383_ID_1885
NODE_992_length_5633_cov_1.28127_ID_1903
NODE_993_length_5627_cov_1.20475_ID_2747
NODE_995_length_5614_cov_1.13003_ID_1905

## Sheet: Group3
NODE_1007_length_5546_cov_0.834946_ID_1927
NODE_1018_length_5492_cov_0.66808_ID_1949
NODE_1024_length_5464_cov_0.709175_ID_1959
NODE_1034_length_5431_cov_0.618799_ID_1981
NODE_1051_length_5310_cov_0.6556_ID_2013
NODE_1054_length_5304_cov_0.625024_ID_2019
NODE_1056_length_5292_cov_0.969175_ID_2023
NODE_1057_length_5291_cov_0.910954_ID_2025
NODE_1064_length_5255_cov_1.36926_ID_2037
NODE_1065_length_5255_cov_0.940031_ID_2039
NODE_1070_length_5223_cov_0.897943_ID_2047
NODE_1071_length_5222_cov_0.597128_ID_2051
NODE_1073_length_5215_cov_0.627866_ID_2053
NODE_1075_length_5188_cov_1.14143_ID_2057
NODE_1077_length_5186_cov_0.982216_ID_2061
NODE_1083_length_5136_cov_0.888889_ID_2073
NODE_1088_length_5120_cov_1.39576_ID_2085
NODE_1092_length_5094_cov_0.697114_ID_2093
NODE_1093_length_5079_cov_1.00319_ID_2095
NODE_1100_length_5049_cov_1.33675_ID_2105
NODE_1102_length_5048_cov_1.1185_ID_2109
NODE_1107_length_5012_cov_0.729719_ID_2121
NODE_1109_length_5005_cov_0.786872_ID_2125
NODE_1110_length_5004_cov_1.1463_ID_2127
NODE_1120_length_4981_cov_1.23677_ID_2143
NODE_1122_length_4965_cov_0.953023_ID_2147
NODE_1123_length_4961_cov_0.679477_ID_2149
NODE_1127_length_4955_cov_0.704462_ID_2157
NODE_1135_length_4911_cov_1.20653_ID_2175
NODE_1137_length_4908_cov_0.983674_ID_2179
NODE_1140_length_4891_cov_0.742638_ID_2187
NODE_1149_length_4858_cov_0.732512_ID_2203
NODE_1152_length_4843_cov_0.687683_ID_2209
NODE_1155_length_4839_cov_0.516562_ID_2215
NODE_1157_length_4825_cov_0.498318_ID_2221
NODE_1168_length_4797_cov_0.517343_ID_2243
NODE_1171_length_4786_cov_1.08713_ID_2251
NODE_1172_length_4784_cov_0.986638_ID_2253
NODE_1175_length_4770_cov_1.22889_ID_2259
NODE_1176_length_4760_cov_1.12577_ID_2261
NODE_1183_length_4735_cov_0.704886_ID_2273
NODE_1185_length_4719_cov_1.24538_ID_2275
NODE_1188_length_4700_cov_0.700929_ID_2283
NODE_1218_length_4581_cov_1.13387_ID_2343
NODE_1223_length_4570_cov_8.25061_ID_5015
NODE_1226_length_4559_cov_0.642539_ID_2357
NODE_1227_length_4558_cov_0.923591_ID_2359
NODE_1228_length_4558_cov_0.797951_ID_2361
NODE_1231_length_4556_cov_0.763985_ID_2367
NODE_1239_length_4529_cov_0.684305_ID_2381
NODE_1248_length_4495_cov_0.577723_ID_2393
NODE_1250_length_4491_cov_0.783356_ID_2397
NODE_1255_length_4473_cov_0.650999_ID_2405
NODE_1260_length_4449_cov_0.984703_ID_2423
NODE_1263_length_4440_cov_0.51773_ID_2427
NODE_1265_length_4435_cov_0.616583_ID_2433
NODE_1272_length_4423_cov_0.794901_ID_2445
NODE_1273_length_4412_cov_0.840663_ID_2447
NODE_1276_length_4403_cov_0.984541_ID_2629
NODE_1281_length_4391_cov_0.711476_ID_2459
NODE_1284_length_4389_cov_1.14815_ID_2465
NODE_1285_length_4384_cov_1.03013_ID_2471
NODE_1286_length_4374_cov_1.27178_ID_2473
NODE_1287_length_4373_cov_1.11083_ID_2475
NODE_1290_length_4372_cov_1.10737_ID_2481
NODE_1296_length_4351_cov_0.952359_ID_2495
NODE_1297_length_4347_cov_0.738429_ID_2497
NODE_1301_length_4330_cov_0.721427_ID_2503
NODE_1303_length_4328_cov_0.800892_ID_2507
NODE_1305_length_4326_cov_0.654686_ID_2511
NODE_1307_length_4316_cov_1.25336_ID_2517
NODE_1311_length_4301_cov_0.636342_ID_2527
NODE_1313_length_4293_cov_0.847301_ID_2531
NODE_1314_length_4285_cov_1.02704_ID_2533
NODE_1316_length_4279_cov_0.656532_ID_2535
NODE_1319_length_4275_cov_0.54874_ID_2541
NODE_1322_length_4271_cov_1.06402_ID_2547
NODE_1325_length_4263_cov_0.913209_ID_2551
NODE_1328_length_4258_cov_0.393889_ID_2557
NODE_1333_length_4246_cov_0.721571_ID_2567
NODE_1334_length_4245_cov_1.07495_ID_2569
NODE_1338_length_4237_cov_0.978647_ID_3531
NODE_1339_length_4228_cov_0.759077_ID_2573
NODE_1344_length_4218_cov_0.695107_ID_2583
NODE_1349_length_4213_cov_1.21839_ID_2593
NODE_1350_length_4206_cov_0.815809_ID_2595
NODE_1351_length_4204_cov_0.451753_ID_2597
NODE_1356_length_4186_cov_0.846976_ID_2603
NODE_1357_length_4186_cov_0.508866_ID_2605
NODE_1361_length_4181_cov_1.01775_ID_2613
NODE_1368_length_4156_cov_0.602398_ID_2627
NODE_1369_length_4153_cov_0.940989_ID_2631
NODE_1374_length_4135_cov_1.15617_ID_2639
NODE_1377_length_4120_cov_0.668724_ID_2905
NODE_1385_length_4097_cov_0.851787_ID_2661
NODE_1390_length_4085_cov_0.737799_ID_2673
NODE_1391_length_4085_cov_0.969124_ID_2675
NODE_1393_length_4080_cov_0.899776_ID_2679
NODE_1399_length_4062_cov_0.713749_ID_2691
NODE_1404_length_4043_cov_0.573478_ID_2703
NODE_1405_length_4039_cov_1.47733_ID_2705
NODE_1408_length_4034_cov_0.809079_ID_2711
NODE_1409_length_4033_cov_1.14077_ID_2713
NODE_1410_length_4032_cov_0.903104_ID_2715
NODE_1421_length_3998_cov_0.62815_ID_2743
NODE_1422_length_3998_cov_0.520234_ID_2745
NODE_1424_length_3991_cov_0.673636_ID_2749
NODE_142_length_41913_cov_1.41499_ID_275
NODE_1442_length_3954_cov_0.879279_ID_2787
NODE_1448_length_3943_cov_0.733609_ID_2799
NODE_1449_length_3942_cov_0.871159_ID_2801
NODE_1452_length_3936_cov_0.678045_ID_46743
NODE_1453_length_3929_cov_1.02435_ID_2809
NODE_1455_length_3915_cov_0.619345_ID_2813
NODE_1456_length_3909_cov_0.83724_ID_2815
NODE_1460_length_3901_cov_0.781576_ID_2819
NODE_1463_length_3892_cov_0.803296_ID_2825
NODE_1465_length_3890_cov_0.587543_ID_2829
NODE_1466_length_3888_cov_1.01047_ID_2831
NODE_1468_length_3875_cov_1.12428_ID_2835
NODE_1471_length_3863_cov_0.93437_ID_2841
NODE_1480_length_3851_cov_0.764939_ID_2861
NODE_1488_length_3819_cov_0.918133_ID_2877
NODE_1492_length_3814_cov_1.45287_ID_2885
NODE_1493_length_3813_cov_0.536859_ID_2887
NODE_1494_length_3812_cov_0.765696_ID_42987
NODE_1495_length_3811_cov_0.978087_ID_2889
NODE_1500_length_3799_cov_0.410188_ID_2899
NODE_1502_length_3794_cov_0.562953_ID_2903
NODE_1503_length_3792_cov_0.695407_ID_2907
NODE_1507_length_3781_cov_0.801724_ID_2913
NODE_1508_length_3780_cov_0.682835_ID_2915
NODE_1509_length_3779_cov_0.551752_ID_2917
NODE_1512_length_3772_cov_1.17067_ID_2921
NODE_1519_length_3755_cov_0.851872_ID_2935
NODE_1520_length_3754_cov_0.710176_ID_2937
NODE_1531_length_3728_cov_0.703198_ID_2951
NODE_1533_length_3722_cov_0.622776_ID_2957
NODE_1537_length_3717_cov_1.27111_ID_2961
NODE_1539_length_3707_cov_0.695162_ID_2965
NODE_1541_length_3703_cov_0.661805_ID_2969
NODE_1542_length_3702_cov_0.767135_ID_2971
NODE_1549_length_3686_cov_0.566768_ID_2981
NODE_1551_length_3684_cov_0.647856_ID_2985
NODE_1559_length_3668_cov_0.528758_ID_2997
NODE_1568_length_3650_cov_1.2072_ID_3007
NODE_1569_length_3649_cov_0.603352_ID_3009
NODE_1571_length_3642_cov_0.755388_ID_3013
NODE_1580_length_3627_cov_0.700956_ID_3029
NODE_1583_length_3622_cov_1.07177_ID_3035
NODE_1584_length_3621_cov_0.727196_ID_3037
NODE_1587_length_3616_cov_0.567804_ID_3041
NODE_1592_length_3607_cov_0.704918_ID_3047
NODE_1593_length_3605_cov_1.03252_ID_3049
NODE_1595_length_3602_cov_0.744693_ID_3053
NODE_1597_length_3599_cov_0.90085_ID_3055
NODE_1601_length_3591_cov_0.588586_ID_3061
NODE_1602_length_3590_cov_1.40812_ID_3063
NODE_1603_length_3589_cov_1.15028_ID_3065
NODE_1607_length_3586_cov_0.737276_ID_3071
NODE_1608_length_3583_cov_0.793398_ID_3073
NODE_1609_length_3583_cov_0.698065_ID_3075
NODE_1610_length_3582_cov_0.77626_ID_3077
NODE_1614_length_3574_cov_0.728959_ID_3083
NODE_1616_length_3566_cov_0.392908_ID_3087
NODE_1619_length_3562_cov_10.1403_ID_11361
NODE_1620_length_3561_cov_0.703608_ID_64311
NODE_1625_length_3556_cov_0.984801_ID_3099
NODE_1626_length_3555_cov_1.06627_ID_3101
NODE_1630_length_3549_cov_0.934483_ID_3109
NODE_1631_length_3548_cov_0.654786_ID_3111
NODE_1636_length_3541_cov_0.890553_ID_3119
NODE_1642_length_3538_cov_0.538484_ID_3131
NODE_1644_length_3533_cov_0.584296_ID_3135
NODE_1646_length_3532_cov_1.32198_ID_3137
NODE_1649_length_3528_cov_0.925412_ID_3141
NODE_1650_length_3523_cov_1.24059_ID_3143
NODE_1651_length_3523_cov_0.83729_ID_3145
NODE_1652_length_3521_cov_0.587775_ID_3147
NODE_1654_length_3518_cov_0.764859_ID_3149
NODE_1656_length_3513_cov_0.75842_ID_3153
NODE_1659_length_3507_cov_1.54828_ID_3157
NODE_1661_length_3506_cov_0.639802_ID_3161
NODE_1663_length_3498_cov_0.617673_ID_3165
NODE_1664_length_3497_cov_0.474329_ID_3167
NODE_1666_length_3491_cov_0.604325_ID_3171
NODE_1670_length_3487_cov_0.510532_ID_3179
NODE_1674_length_3480_cov_0.644679_ID_3187
NODE_1675_length_3479_cov_0.721994_ID_3189
NODE_1676_length_3479_cov_0.949267_ID_3191
NODE_1678_length_3476_cov_1.98474_ID_3195
NODE_1682_length_3463_cov_0.534178_ID_3199
NODE_1685_length_3461_cov_0.774764_ID_3201
NODE_1689_length_3457_cov_1.14168_ID_3209
NODE_168_length_35459_cov_1.62402_ID_355
NODE_1691_length_3454_cov_1.05436_ID_3211
NODE_1692_length_3453_cov_1.45892_ID_3213
NODE_1693_length_3451_cov_0.82052_ID_3215
NODE_1697_length_3445_cov_0.558649_ID_3223
NODE_1698_length_3445_cov_0.904621_ID_3225
NODE_1699_length_3444_cov_0.774815_ID_3227
NODE_1701_length_3434_cov_0.916493_ID_3231
NODE_1702_length_3431_cov_1.36942_ID_3233
NODE_1707_length_3426_cov_1.09711_ID_3237
NODE_1709_length_3423_cov_0.765653_ID_3541
NODE_1710_length_3423_cov_0.79845_ID_3241
NODE_1711_length_3420_cov_0.613847_ID_36463
NODE_1712_length_3418_cov_0.869215_ID_3243
NODE_1713_length_3418_cov_0.54673_ID_3245
NODE_1715_length_3416_cov_0.696146_ID_3247
NODE_1720_length_3410_cov_0.485184_ID_3255
NODE_1724_length_3405_cov_0.655276_ID_3261
NODE_1726_length_3402_cov_0.551155_ID_3265
NODE_1729_length_3399_cov_0.543243_ID_3271
NODE_1730_length_3397_cov_0.669772_ID_3273
NODE_1733_length_3393_cov_0.965403_ID_3279
NODE_1734_length_3391_cov_0.514148_ID_3281
NODE_1740_length_3386_cov_1.22279_ID_3293
NODE_1743_length_3382_cov_0.774525_ID_3299
NODE_1747_length_3375_cov_0.595584_ID_3305
NODE_1749_length_3373_cov_0.378632_ID_3309
NODE_1750_length_3368_cov_0.646863_ID_3311
NODE_1751_length_3366_cov_0.379739_ID_3313
NODE_1752_length_3364_cov_1.06495_ID_91275
NODE_1753_length_3363_cov_0.362477_ID_3315
NODE_1754_length_3363_cov_0.661809_ID_3317
NODE_1756_length_3363_cov_1.14784_ID_3319
NODE_1758_length_3358_cov_1.19307_ID_3323
NODE_1762_length_3354_cov_0.723288_ID_3331
NODE_1763_length_3354_cov_1.1516_ID_3333
NODE_1766_length_3347_cov_0.445394_ID_3335
NODE_1768_length_3346_cov_0.651205_ID_3337
NODE_1773_length_3341_cov_0.558374_ID_3347
NODE_1777_length_3338_cov_0.637504_ID_3355
NODE_1784_length_3327_cov_0.605586_ID_3367
NODE_1786_length_3326_cov_0.888548_ID_3371
NODE_1791_length_3322_cov_0.76391_ID_3379
NODE_1792_length_3322_cov_0.499539_ID_3381
NODE_1795_length_3320_cov_0.617349_ID_3387
NODE_1796_length_3319_cov_0.720308_ID_3389
NODE_1797_length_3317_cov_0.605603_ID_3391
NODE_1804_length_3307_cov_0.553119_ID_3403
NODE_1807_length_3302_cov_0.956078_ID_3407
NODE_1809_length_3301_cov_0.75_ID_3411
NODE_1810_length_3297_cov_0.668216_ID_3413
NODE_1811_length_3296_cov_0.620081_ID_3415
NODE_1813_length_3295_cov_5.69002_ID_4653
NODE_1815_length_3292_cov_0.817561_ID_3421
NODE_1818_length_3290_cov_0.642658_ID_3425
NODE_1820_length_3287_cov_0.722809_ID_3429
NODE_1821_length_3284_cov_1.23359_ID_3433
NODE_1824_length_3283_cov_1.12321_ID_91403
NODE_1830_length_3272_cov_0.437402_ID_3449
NODE_1832_length_3271_cov_0.480949_ID_3453
NODE_1836_length_3263_cov_1.00219_ID_3457
NODE_1838_length_3257_cov_0.667189_ID_3461
NODE_1843_length_3251_cov_0.610937_ID_3469
NODE_1847_length_3241_cov_0.849937_ID_3475
NODE_1848_length_3241_cov_0.809269_ID_3477
NODE_1849_length_3240_cov_0.495743_ID_3479
NODE_1850_length_3239_cov_0.685174_ID_3481
NODE_1855_length_3234_cov_0.718167_ID_3487
NODE_1856_length_3232_cov_1.19285_ID_3489
NODE_1857_length_3228_cov_0.706553_ID_3493
NODE_1859_length_3227_cov_0.723559_ID_3497
NODE_1860_length_3227_cov_0.787524_ID_3499
NODE_1861_length_3226_cov_0.768451_ID_3501
NODE_1862_length_3226_cov_0.890086_ID_3503
NODE_1864_length_3223_cov_0.752378_ID_3507
NODE_1865_length_3222_cov_0.773866_ID_4561
NODE_1866_length_3222_cov_0.940057_ID_3509
NODE_1867_length_3219_cov_0.560317_ID_3511
NODE_1869_length_3216_cov_0.52272_ID_3513
NODE_1870_length_3216_cov_1.30791_ID_3515
NODE_1874_length_3203_cov_0.359923_ID_3521
NODE_1881_length_3196_cov_0.876559_ID_3529
NODE_1887_length_3184_cov_1.2825_ID_3545
NODE_1889_length_3181_cov_0.841581_ID_3549
NODE_1892_length_3180_cov_0.740598_ID_3553
NODE_1893_length_3176_cov_0.699388_ID_3555
NODE_1894_length_3175_cov_0.806182_ID_3557
NODE_1897_length_3174_cov_0.825765_ID_3563
NODE_1900_length_3173_cov_1.11534_ID_91315
NODE_1902_length_3167_cov_0.453196_ID_3571
NODE_1906_length_3160_cov_0.71045_ID_3577
NODE_1907_length_3159_cov_0.997735_ID_3581
NODE_1908_length_3157_cov_0.649611_ID_3583
NODE_1910_length_3155_cov_0.680169_ID_3585
NODE_1911_length_3154_cov_0.539384_ID_3587
NODE_1913_length_3151_cov_0.606749_ID_3591
NODE_1914_length_3151_cov_0.636275_ID_3593
NODE_1915_length_3150_cov_0.478741_ID_3595
NODE_1917_length_3147_cov_0.364522_ID_3599
NODE_1919_length_3143_cov_1.05856_ID_3603
NODE_1922_length_3142_cov_0.592255_ID_3607
NODE_1925_length_3136_cov_0.679165_ID_3613
NODE_1926_length_3135_cov_1.20841_ID_3615
NODE_1929_length_3133_cov_0.916123_ID_3621
NODE_1932_length_3125_cov_0.876963_ID_3627
NODE_1933_length_3124_cov_0.433061_ID_3629
NODE_1934_length_3122_cov_0.805765_ID_3631
NODE_1935_length_3120_cov_0.845952_ID_3633
NODE_1937_length_3119_cov_0.718033_ID_3637
NODE_1938_length_3118_cov_0.628731_ID_3639
NODE_1940_length_3114_cov_0.631527_ID_3643
NODE_1944_length_3107_cov_0.555629_ID_3649
NODE_1945_length_3107_cov_0.679394_ID_3651
NODE_1949_length_3105_cov_1.05764_ID_3659
NODE_1950_length_3099_cov_0.715512_ID_3661
NODE_1951_length_3098_cov_1.0997_ID_3663
NODE_1954_length_3096_cov_1.02709_ID_91467
NODE_1956_length_3096_cov_0.451272_ID_3669
NODE_1962_length_3090_cov_1.06786_ID_3681
NODE_1963_length_3088_cov_0.767141_ID_3683
NODE_1967_length_3079_cov_0.877076_ID_3689
NODE_1969_length_3078_cov_0.799934_ID_3693
NODE_1971_length_3077_cov_0.565824_ID_3695
NODE_1972_length_3077_cov_0.586436_ID_3697
NODE_1974_length_3070_cov_0.756081_ID_3703
NODE_1975_length_3068_cov_0.633878_ID_3705
NODE_1978_length_3067_cov_0.522348_ID_3709
NODE_1980_length_3064_cov_0.430718_ID_3713
NODE_1983_length_3062_cov_0.451387_ID_3719
NODE_1985_length_3056_cov_0.567794_ID_3721
NODE_1988_length_3055_cov_0.734092_ID_3725
NODE_1990_length_3052_cov_0.880657_ID_3729
NODE_1991_length_3050_cov_1.00839_ID_3731
NODE_1995_length_3044_cov_0.986218_ID_3733
NODE_1996_length_3044_cov_1.28605_ID_3735
NODE_1997_length_3043_cov_0.565905_ID_3737
NODE_1999_length_3040_cov_0.837092_ID_3741
NODE_2000_length_3039_cov_1.06162_ID_3743
NODE_2002_length_3036_cov_1.62184_ID_3745
NODE_2005_length_3027_cov_0.566937_ID_3749
NODE_2007_length_3025_cov_0.388701_ID_3753
NODE_2011_length_3021_cov_0.817412_ID_3763
NODE_2013_length_3014_cov_0.580985_ID_3765
NODE_2014_length_3014_cov_0.557216_ID_3767
NODE_2016_length_3012_cov_0.814815_ID_3769
NODE_2018_length_3012_cov_0.591233_ID_3773
NODE_2019_length_3011_cov_0.814072_ID_3775
NODE_2022_length_3008_cov_0.740048_ID_3779
NODE_2023_length_3001_cov_1.32435_ID_91773
NODE_2025_length_2998_cov_0.586548_ID_3781
NODE_2029_length_2992_cov_0.562778_ID_3787
NODE_2033_length_2987_cov_0.612748_ID_3793
NODE_2034_length_2986_cov_0.688378_ID_3795
NODE_2038_length_2981_cov_0.469437_ID_3803
NODE_2041_length_2980_cov_0.930265_ID_3809
NODE_2047_length_2973_cov_0.848485_ID_3813
NODE_2048_length_2972_cov_0.800207_ID_3815
NODE_2050_length_2968_cov_0.651949_ID_3819
NODE_2052_length_2961_cov_0.693983_ID_3823
NODE_2053_length_2961_cov_0.626902_ID_3825
NODE_2055_length_2961_cov_0.547026_ID_3829
NODE_2056_length_2959_cov_0.438062_ID_3831
NODE_2058_length_2956_cov_0.630412_ID_3835
NODE_2059_length_2956_cov_0.974368_ID_3837
NODE_2060_length_2954_cov_0.748007_ID_3839
NODE_2062_length_2952_cov_0.603885_ID_3841
NODE_2064_length_2951_cov_0.583969_ID_3843
NODE_2065_length_2948_cov_0.748871_ID_3845
NODE_2068_length_2945_cov_0.90612_ID_3851
NODE_2069_length_2944_cov_0.524522_ID_3853
NODE_2070_length_2942_cov_0.826662_ID_3855
NODE_2071_length_2941_cov_0.673747_ID_3857
NODE_2073_length_2937_cov_0.79463_ID_3865
NODE_2080_length_2930_cov_0.567284_ID_3879
NODE_2081_length_2928_cov_0.642882_ID_3881
NODE_2085_length_2922_cov_0.576236_ID_3889
NODE_2087_length_2922_cov_1.45636_ID_3891
NODE_2090_length_2920_cov_0.471414_ID_3897
NODE_2092_length_2919_cov_0.92_ID_3901
NODE_2094_length_2912_cov_0.368976_ID_3907
NODE_2096_length_2910_cov_0.629004_ID_3911
NODE_2097_length_2910_cov_0.342485_ID_3913
NODE_2098_length_2910_cov_0.701514_ID_3915
NODE_2099_length_2908_cov_0.535752_ID_3917
NODE_2110_length_2895_cov_0.392074_ID_3935
NODE_2112_length_2893_cov_0.580028_ID_3937
NODE_2113_length_2891_cov_0.716513_ID_3939
NODE_2115_length_2891_cov_0.59922_ID_3941
NODE_2118_length_2888_cov_0.43597_ID_3947
NODE_2121_length_2884_cov_0.943517_ID_3951
NODE_2124_length_2882_cov_0.449342_ID_3957
NODE_2125_length_2880_cov_1.1608_ID_3959
NODE_2127_length_2879_cov_0.519573_ID_3963
NODE_2130_length_2877_cov_0.630698_ID_3967
NODE_2131_length_2876_cov_0.55611_ID_3969
NODE_2134_length_2874_cov_0.547594_ID_3973
NODE_2146_length_2866_cov_1.50697_ID_3995
NODE_2148_length_2860_cov_0.753135_ID_3999
NODE_2149_length_2859_cov_0.737276_ID_4001
NODE_2150_length_2857_cov_0.539813_ID_4003
NODE_2151_length_2857_cov_0.696557_ID_4005
NODE_2157_length_2849_cov_0.574101_ID_4013
NODE_2158_length_2848_cov_0.412019_ID_4015
NODE_2160_length_2847_cov_0.609791_ID_4019
NODE_2161_length_2846_cov_0.574361_ID_4021
NODE_2163_length_2844_cov_0.522883_ID_4025
NODE_2164_length_2843_cov_0.69142_ID_4027
NODE_2166_length_2842_cov_0.405698_ID_4031
NODE_2167_length_2841_cov_0.661977_ID_4033
NODE_2168_length_2840_cov_0.539156_ID_4035
NODE_2169_length_2840_cov_0.746301_ID_4037
NODE_2172_length_2838_cov_0.675695_ID_4043
NODE_2174_length_2837_cov_0.851156_ID_4045
NODE_2178_length_2830_cov_0.610286_ID_4053
NODE_2180_length_2829_cov_12.742_ID_31355
NODE_2182_length_2828_cov_0.654585_ID_4057
NODE_2184_length_2824_cov_1.07768_ID_91595
NODE_2185_length_2823_cov_0.458606_ID_4061
NODE_2186_length_2822_cov_0.503088_ID_4063
NODE_2187_length_2820_cov_0.888404_ID_4065
NODE_2188_length_2817_cov_1.07096_ID_4067
NODE_2189_length_2817_cov_0.393013_ID_4069
NODE_2190_length_2816_cov_0.476884_ID_4071
NODE_2191_length_2814_cov_0.887432_ID_4073
NODE_2192_length_2813_cov_0.618805_ID_4075
NODE_2193_length_2812_cov_0.535545_ID_4077
NODE_2196_length_2812_cov_0.570179_ID_4083
NODE_2197_length_2809_cov_1.07117_ID_4085
NODE_2198_length_2808_cov_0.560789_ID_4087
NODE_2201_length_2805_cov_0.73136_ID_4091
NODE_2202_length_2805_cov_1.15241_ID_4093
NODE_2203_length_2805_cov_0.611111_ID_4095
NODE_2205_length_2804_cov_0.680804_ID_4097
NODE_2206_length_2804_cov_0.920658_ID_4099
NODE_2209_length_2801_cov_0.505857_ID_4103
NODE_2210_length_2798_cov_0.677538_ID_4105
NODE_2213_length_2797_cov_0.817449_ID_4111
NODE_2214_length_2797_cov_0.704545_ID_4113
NODE_2218_length_2791_cov_0.584864_ID_4117
NODE_2220_length_2790_cov_1.73649_ID_4121
NODE_2221_length_2789_cov_0.803676_ID_4123
NODE_2222_length_2788_cov_0.71644_ID_4125
NODE_2223_length_2788_cov_0.706142_ID_4127
NODE_2224_length_2787_cov_1.13135_ID_4129
NODE_2225_length_2787_cov_0.774099_ID_4131
NODE_2227_length_2786_cov_0.565697_ID_4133
NODE_2229_length_2784_cov_0.618416_ID_4135
NODE_2232_length_2782_cov_0.981202_ID_91743
NODE_2234_length_2779_cov_0.630627_ID_4141
NODE_2235_length_2777_cov_0.954579_ID_4145
NODE_2236_length_2776_cov_0.463613_ID_4147
NODE_2239_length_2775_cov_0.902069_ID_4151
NODE_2240_length_2775_cov_0.630451_ID_4153
NODE_2242_length_2773_cov_1.13905_ID_4157
NODE_2244_length_2772_cov_0.699223_ID_4161
NODE_2245_length_2771_cov_0.535529_ID_4163
NODE_2247_length_2767_cov_0.659007_ID_4167
NODE_2248_length_2766_cov_0.813867_ID_4169
NODE_2250_length_2761_cov_0.52266_ID_4173
NODE_2255_length_2752_cov_0.654119_ID_4183
NODE_2259_length_2749_cov_0.520522_ID_4189
NODE_2260_length_2748_cov_1.33744_ID_4191
NODE_2265_length_2745_cov_1.40957_ID_4197
NODE_2266_length_2743_cov_0.602842_ID_4199
NODE_2268_length_2740_cov_0.773493_ID_4203
NODE_2269_length_2738_cov_1.05658_ID_4205
NODE_2270_length_2738_cov_0.624578_ID_4207
NODE_2271_length_2736_cov_0.509561_ID_4209
NODE_2273_length_2735_cov_0.596024_ID_4213
NODE_2279_length_2722_cov_0.385224_ID_4223
NODE_2280_length_2721_cov_0.684766_ID_4225
NODE_2282_length_2720_cov_0.519049_ID_4229
NODE_2283_length_2719_cov_0.680755_ID_4231
NODE_2287_length_2713_cov_0.55938_ID_4239
NODE_2289_length_2710_cov_0.585006_ID_4241
NODE_2291_length_2709_cov_0.592803_ID_4245
NODE_2292_length_2709_cov_0.778788_ID_4247
NODE_2293_length_2709_cov_1.09508_ID_4249
NODE_2294_length_2708_cov_0.387647_ID_4251
NODE_2296_length_2707_cov_0.636846_ID_4255
NODE_2297_length_2707_cov_1.0235_ID_4257
NODE_2299_length_2705_cov_0.594841_ID_4259
NODE_2304_length_2700_cov_0.660585_ID_4267
NODE_2306_length_2697_cov_0.620244_ID_4271
NODE_2307_length_2693_cov_0.430259_ID_4273
NODE_2308_length_2693_cov_0.902058_ID_4275
NODE_2314_length_2687_cov_1.05577_ID_4287
NODE_2315_length_2686_cov_0.659916_ID_4289
NODE_2316_length_2686_cov_0.98548_ID_4291
NODE_2317_length_2686_cov_1.09324_ID_4293
NODE_2320_length_2685_cov_0.654052_ID_7183
NODE_2322_length_2684_cov_0.673805_ID_4301
NODE_2323_length_2684_cov_1.00268_ID_91941
NODE_2324_length_2683_cov_1.08454_ID_4303
NODE_2325_length_2681_cov_0.945636_ID_4305
NODE_2326_length_2679_cov_0.962835_ID_4307
NODE_2327_length_2678_cov_0.673438_ID_4309
NODE_2329_length_2673_cov_0.974654_ID_4313
NODE_2332_length_2671_cov_0.6299_ID_4315
NODE_2335_length_2668_cov_0.885341_ID_4321
NODE_2339_length_2666_cov_0.591837_ID_4329
NODE_2340_length_2665_cov_0.632512_ID_4331
NODE_2341_length_2664_cov_0.672832_ID_4333
NODE_2342_length_2663_cov_0.961449_ID_4335
NODE_2343_length_2662_cov_0.731585_ID_4337
NODE_2346_length_2660_cov_1.01003_ID_4343
NODE_2348_length_2658_cov_0.410197_ID_4345
NODE_2350_length_2658_cov_0.565469_ID_4349
NODE_2351_length_2657_cov_0.887944_ID_4351
NODE_2353_length_2657_cov_0.571097_ID_4353
NODE_2359_length_2650_cov_0.736536_ID_4363
NODE_2361_length_2650_cov_0.693142_ID_4367
NODE_2363_length_2649_cov_0.949612_ID_4369
NODE_2364_length_2649_cov_0.570155_ID_4371
NODE_2366_length_2647_cov_0.486811_ID_4375
NODE_2367_length_2646_cov_0.762127_ID_4377
NODE_2368_length_2645_cov_0.588898_ID_4379
NODE_2369_length_2645_cov_1.04658_ID_4381
NODE_2372_length_2643_cov_0.722999_ID_4385
NODE_2373_length_2642_cov_0.68286_ID_4387
NODE_2376_length_2640_cov_0.530144_ID_4393
NODE_2380_length_2638_cov_0.676917_ID_4397
NODE_2381_length_2636_cov_0.563303_ID_4399
NODE_2384_length_2634_cov_0.451072_ID_4403
NODE_2385_length_2633_cov_0.892356_ID_4405
NODE_2386_length_2633_cov_0.595944_ID_4407
NODE_2387_length_2631_cov_0.552693_ID_4409
NODE_2388_length_2631_cov_0.465652_ID_4411
NODE_2391_length_2629_cov_0.598828_ID_4417
NODE_2392_length_2629_cov_0.596875_ID_4419
NODE_2393_length_2625_cov_0.563772_ID_4423
NODE_2394_length_2625_cov_0.761346_ID_91685
NODE_2395_length_2624_cov_1.13816_ID_4425
NODE_2396_length_2623_cov_0.901723_ID_4427
NODE_2399_length_2620_cov_0.898471_ID_4431
NODE_2406_length_2616_cov_0.747939_ID_4445
NODE_2407_length_2615_cov_0.401021_ID_4447
NODE_2408_length_2614_cov_0.811395_ID_4449
NODE_2409_length_2612_cov_0.564687_ID_4451
NODE_2410_length_2610_cov_0.413223_ID_4453
NODE_2414_length_2608_cov_0.462781_ID_4457
NODE_2415_length_2608_cov_0.41985_ID_4459
NODE_2416_length_2606_cov_0.685849_ID_4461
NODE_2417_length_2605_cov_0.756703_ID_4463
NODE_2418_length_2605_cov_0.492114_ID_4465
NODE_2419_length_2604_cov_0.552663_ID_4467
NODE_2420_length_2603_cov_0.630229_ID_4469
NODE_2422_length_2602_cov_1.67469_ID_4473
NODE_2423_length_2602_cov_0.796289_ID_91337
NODE_2424_length_2601_cov_0.525276_ID_4475
NODE_2426_length_2599_cov_0.628854_ID_4479
NODE_2429_length_2598_cov_0.349941_ID_4485
NODE_2431_length_2597_cov_1.10166_ID_4489
NODE_2433_length_2596_cov_0.545311_ID_4493
NODE_2435_length_2595_cov_1.13539_ID_4497
NODE_2437_length_2594_cov_1.11089_ID_4499
NODE_2440_length_2589_cov_1.02778_ID_5191
NODE_2443_length_2588_cov_0.493847_ID_4503
NODE_2445_length_2584_cov_0.73837_ID_4507
NODE_2448_length_2582_cov_0.512933_ID_4513
NODE_2449_length_2582_cov_0.883008_ID_4515
NODE_2451_length_2581_cov_0.726115_ID_4519
NODE_2453_length_2578_cov_0.416899_ID_4523
NODE_2455_length_2577_cov_0.733254_ID_4525
NODE_2456_length_2576_cov_0.538891_ID_4527
NODE_2457_length_2576_cov_0.831671_ID_4529
NODE_2460_length_2574_cov_0.662275_ID_4535
NODE_2461_length_2574_cov_0.817964_ID_4537
NODE_2462_length_2573_cov_0.495607_ID_4539
NODE_2465_length_2570_cov_0.469012_ID_4543
NODE_2466_length_2570_cov_0.95002_ID_14903
NODE_2472_length_2564_cov_0.571944_ID_4551
NODE_2474_length_2562_cov_0.490574_ID_4557
NODE_2477_length_2557_cov_0.413987_ID_4563
NODE_2478_length_2557_cov_0.734325_ID_4565
NODE_2480_length_2556_cov_0.627664_ID_4569
NODE_2481_length_2556_cov_0.883796_ID_4571
NODE_2483_length_2554_cov_0.405634_ID_4573
NODE_2484_length_2554_cov_0.720322_ID_4575
NODE_2486_length_2552_cov_0.619815_ID_4577
NODE_2487_length_2552_cov_0.512686_ID_4579
NODE_2489_length_2551_cov_0.504835_ID_4581
NODE_2490_length_2551_cov_0.685334_ID_4583
NODE_2491_length_2550_cov_0.776703_ID_4585
NODE_2494_length_2548_cov_0.382009_ID_4589
NODE_2497_length_2547_cov_0.554883_ID_4593
NODE_2498_length_2546_cov_0.56843_ID_4595
NODE_2499_length_2545_cov_0.549273_ID_4597
NODE_2501_length_2543_cov_1.28173_ID_4601
NODE_2502_length_2542_cov_0.406389_ID_4603
NODE_2503_length_2541_cov_0.73301_ID_4605
NODE_2505_length_2541_cov_0.95712_ID_4607
NODE_2506_length_2540_cov_0.600162_ID_4609
NODE_2507_length_2539_cov_0.904453_ID_4611
NODE_2512_length_2536_cov_0.920146_ID_4617
NODE_2514_length_2535_cov_0.469181_ID_4619
NODE_2515_length_2535_cov_0.679643_ID_4621
NODE_2516_length_2535_cov_0.669505_ID_4623
NODE_2517_length_2534_cov_0.529817_ID_4625
NODE_2518_length_2533_cov_1.02354_ID_4627
NODE_2523_length_2527_cov_0.707486_ID_4635
NODE_2524_length_2527_cov_0.84703_ID_4637
NODE_2525_length_2525_cov_0.658388_ID_4639
NODE_2526_length_2525_cov_0.773616_ID_14127
NODE_2527_length_2525_cov_1.31637_ID_4641
NODE_2528_length_2524_cov_0.473727_ID_4643
NODE_2531_length_2524_cov_0.495316_ID_4647
NODE_2534_length_2520_cov_0.43778_ID_4651
NODE_2536_length_2517_cov_0.55433_ID_4657
NODE_2541_length_2512_cov_0.736799_ID_4663
NODE_2542_length_2510_cov_0.858664_ID_4665
NODE_2546_length_2507_cov_1.50287_ID_4667
NODE_2548_length_2504_cov_0.615195_ID_4671
NODE_2550_length_2503_cov_0.749795_ID_4675
NODE_2552_length_2501_cov_0.488898_ID_4679
NODE_2553_length_2500_cov_0.722336_ID_4681
NODE_2554_length_2500_cov_0.365282_ID_4683
NODE_2555_length_2499_cov_0.563786_ID_4685
NODE_2556_length_2498_cov_0.789625_ID_4689
NODE_2559_length_2497_cov_0.48229_ID_4693
NODE_2561_length_2496_cov_0.526164_ID_4697
NODE_2562_length_2495_cov_1.00289_ID_4699
NODE_2565_length_2495_cov_0.979802_ID_4703
NODE_2566_length_2494_cov_0.686598_ID_4705
NODE_2568_length_2493_cov_0.819307_ID_4709
NODE_2571_length_2492_cov_0.699959_ID_4715
NODE_2573_length_2490_cov_1.13548_ID_4719
NODE_2574_length_2490_cov_0.870302_ID_4721
NODE_2577_length_2488_cov_0.599835_ID_4725
NODE_2578_length_2486_cov_0.572611_ID_4727
NODE_2582_length_2480_cov_1.54002_ID_4733
NODE_2584_length_2478_cov_0.6044_ID_4735
NODE_2585_length_2478_cov_1.04151_ID_4737
NODE_2586_length_2477_cov_0.787791_ID_9237
NODE_2588_length_2477_cov_0.488787_ID_4743
NODE_2590_length_2476_cov_0.906938_ID_4747
NODE_2592_length_2476_cov_0.635646_ID_4751
NODE_2594_length_2475_cov_0.464256_ID_4755
NODE_2595_length_2474_cov_0.586694_ID_4757
NODE_2597_length_2472_cov_0.526841_ID_91857
NODE_2600_length_2471_cov_0.624063_ID_4763
NODE_2601_length_2469_cov_0.632083_ID_4765
NODE_2603_length_2468_cov_1.38099_ID_4769
NODE_2604_length_2467_cov_0.810259_ID_4771
NODE_2605_length_2467_cov_0.603003_ID_4773
NODE_2606_length_2466_cov_0.408844_ID_4775
NODE_2607_length_2466_cov_0.684189_ID_4777
NODE_2608_length_2465_cov_0.641486_ID_4779
NODE_2609_length_2463_cov_0.579365_ID_4783
NODE_2612_length_2459_cov_0.81046_ID_4787
NODE_2613_length_2459_cov_0.666527_ID_4789
NODE_2614_length_2458_cov_0.483047_ID_4791
NODE_2615_length_2457_cov_0.982412_ID_4793
NODE_2616_length_2457_cov_0.730318_ID_4795
NODE_2617_length_2457_cov_0.660804_ID_4797
NODE_2619_length_2457_cov_0.762982_ID_4801
NODE_2621_length_2455_cov_0.467309_ID_4805
NODE_2622_length_2455_cov_0.650461_ID_4807
NODE_2623_length_2455_cov_0.883906_ID_9925
NODE_2625_length_2454_cov_0.480084_ID_4811
NODE_2626_length_2453_cov_0.65604_ID_4813
NODE_2627_length_2450_cov_0.710626_ID_4815
NODE_2630_length_2448_cov_0.37747_ID_4821
NODE_2631_length_2447_cov_0.468461_ID_4823
NODE_2633_length_2446_cov_0.671435_ID_4825
NODE_2634_length_2446_cov_0.679849_ID_4827
NODE_2636_length_2445_cov_0.593013_ID_4831
NODE_2642_length_2442_cov_0.89212_ID_4841
NODE_2643_length_2441_cov_0.59317_ID_4843
NODE_2644_length_2441_cov_0.457841_ID_4845
NODE_2648_length_2439_cov_0.736709_ID_4853
NODE_2650_length_2437_cov_0.430321_ID_4857
NODE_2653_length_2436_cov_0.74229_ID_4863
NODE_2656_length_2435_cov_0.565089_ID_4867
NODE_2661_length_2433_cov_0.801184_ID_4873
NODE_2663_length_2433_cov_0.716582_ID_4877
NODE_2666_length_2430_cov_0.418043_ID_4883
NODE_2667_length_2429_cov_0.834322_ID_4885
NODE_2669_length_2427_cov_0.395674_ID_4889
NODE_2673_length_2423_cov_0.769754_ID_4895
NODE_2674_length_2423_cov_0.542481_ID_4897
NODE_2675_length_2423_cov_0.723449_ID_4899
NODE_2677_length_2422_cov_0.61326_ID_4903
NODE_2678_length_2422_cov_0.690183_ID_4905
NODE_2680_length_2421_cov_0.795918_ID_4907
NODE_2681_length_2421_cov_0.657313_ID_4909
NODE_2683_length_2420_cov_0.859209_ID_4913
NODE_2684_length_2419_cov_0.382553_ID_4915
NODE_2685_length_2419_cov_0.59234_ID_4917
NODE_2686_length_2418_cov_0.682418_ID_4919
NODE_2689_length_2417_cov_0.303663_ID_4925
NODE_2690_length_2416_cov_0.995313_ID_4927
NODE_2692_length_2415_cov_0.855925_ID_4931
NODE_2693_length_2414_cov_0.501493_ID_4933
NODE_2694_length_2413_cov_0.863908_ID_4935
NODE_2696_length_2405_cov_0.669521_ID_4939
NODE_2698_length_2401_cov_0.609348_ID_4943
NODE_2702_length_2397_cov_0.377577_ID_4949
NODE_2703_length_2396_cov_0.502793_ID_4951
NODE_2705_length_2394_cov_0.473978_ID_4955
NODE_2706_length_2394_cov_0.458065_ID_4957
NODE_2707_length_2393_cov_0.683735_ID_4959
NODE_2709_length_2393_cov_0.888124_ID_4961
NODE_2711_length_2392_cov_0.70297_ID_4963
NODE_2712_length_2390_cov_0.81215_ID_4965
NODE_2713_length_2389_cov_0.881897_ID_8623
NODE_2715_length_2389_cov_0.634914_ID_4967
NODE_2716_length_2388_cov_0.741268_ID_4969
NODE_2717_length_2388_cov_0.445882_ID_4971
NODE_2718_length_2386_cov_0.495468_ID_4973
NODE_2719_length_2385_cov_0.437392_ID_4975
NODE_2720_length_2382_cov_1.02118_ID_4977
NODE_2721_length_2380_cov_0.37646_ID_4979
NODE_2723_length_2377_cov_0.62435_ID_4983
NODE_2724_length_2377_cov_0.951906_ID_4985
NODE_2727_length_2375_cov_0.464874_ID_4991
NODE_2728_length_2374_cov_0.465076_ID_4993
NODE_2729_length_2373_cov_0.93967_ID_4995
NODE_2730_length_2372_cov_1.47937_ID_4997
NODE_2732_length_2371_cov_0.51086_ID_4999
NODE_2734_length_2369_cov_0.437391_ID_5005
NODE_2736_length_2367_cov_0.700174_ID_5009
NODE_2737_length_2367_cov_0.677981_ID_5011
NODE_2738_length_2366_cov_0.492381_ID_5013
NODE_2739_length_2363_cov_0.436356_ID_5017
NODE_2741_length_2363_cov_1.13165_ID_5021
NODE_2742_length_2363_cov_0.738884_ID_5023
NODE_2743_length_2362_cov_0.620584_ID_5025
NODE_2744_length_2362_cov_0.970781_ID_5027
NODE_2745_length_2362_cov_0.565635_ID_5029
NODE_2746_length_2362_cov_0.833842_ID_5031
NODE_2748_length_2362_cov_0.556476_ID_5035
NODE_2749_length_2360_cov_0.907464_ID_5037
NODE_2750_length_2360_cov_0.561327_ID_5039
NODE_2752_length_2359_cov_0.506114_ID_5041
NODE_2753_length_2357_cov_0.994755_ID_5043
NODE_2754_length_2357_cov_0.48514_ID_5045
NODE_2755_length_2356_cov_0.743332_ID_5047
NODE_2756_length_2355_cov_0.665792_ID_5049
NODE_2758_length_2355_cov_0.554243_ID_5051
NODE_2759_length_2355_cov_0.668416_ID_5053
NODE_2760_length_2354_cov_0.701532_ID_5055
NODE_2761_length_2354_cov_0.514661_ID_5057
NODE_2762_length_2353_cov_0.521891_ID_5059
NODE_2765_length_2353_cov_0.528897_ID_5061
NODE_2766_length_2352_cov_1.02102_ID_5063
NODE_2767_length_2351_cov_0.584137_ID_5065
NODE_2769_length_2349_cov_1.03026_ID_5067
NODE_2770_length_2348_cov_0.825801_ID_5069
NODE_2773_length_2344_cov_0.596484_ID_5075
NODE_2776_length_2341_cov_0.493838_ID_5081
NODE_2777_length_2340_cov_0.466314_ID_5083
NODE_2778_length_2340_cov_0.817261_ID_5085
NODE_2779_length_2339_cov_0.362555_ID_5087
NODE_2780_length_2339_cov_0.65859_ID_5089
NODE_2781_length_2338_cov_0.816219_ID_5091
NODE_2782_length_2338_cov_0.465403_ID_5093
NODE_2783_length_2337_cov_0.593034_ID_5095
NODE_2785_length_2337_cov_0.61552_ID_5099
NODE_2787_length_2334_cov_0.525828_ID_5103
NODE_2789_length_2332_cov_1.34821_ID_5107
NODE_2790_length_2330_cov_0.770456_ID_5109
NODE_2791_length_2329_cov_0.472566_ID_5111
NODE_2792_length_2329_cov_1.36504_ID_5113
NODE_2793_length_2328_cov_0.730412_ID_5115
NODE_2794_length_2328_cov_1.02568_ID_5117
NODE_2795_length_2327_cov_0.507086_ID_5119
NODE_2796_length_2327_cov_0.571302_ID_5121
NODE_2799_length_2326_cov_0.829863_ID_5127
NODE_2801_length_2324_cov_0.713969_ID_5131
NODE_2802_length_2324_cov_0.877162_ID_5133
NODE_2803_length_2323_cov_0.52307_ID_5135
NODE_2808_length_2320_cov_0.482008_ID_5143
NODE_2809_length_2318_cov_0.562028_ID_5145
NODE_2810_length_2318_cov_1.09693_ID_5147
NODE_2811_length_2316_cov_0.611037_ID_5149
NODE_2815_length_2314_cov_0.753675_ID_5157
NODE_2817_length_2312_cov_0.775301_ID_5163
NODE_2821_length_2310_cov_0.706827_ID_5167
NODE_2822_length_2310_cov_0.600625_ID_5169
NODE_2825_length_2309_cov_0.507589_ID_5173
NODE_2826_length_2309_cov_0.495089_ID_5175
NODE_2828_length_2308_cov_0.662349_ID_5179
NODE_2829_length_2306_cov_0.56996_ID_5181
NODE_2831_length_2305_cov_0.636852_ID_5185
NODE_2835_length_2302_cov_0.570533_ID_5193
NODE_2838_length_2301_cov_0.545251_ID_5197
NODE_2839_length_2299_cov_0.791031_ID_5199
NODE_2841_length_2297_cov_0.472621_ID_5201
NODE_2842_length_2297_cov_0.701975_ID_5203
NODE_2843_length_2297_cov_0.583034_ID_5205
NODE_2844_length_2297_cov_0.335727_ID_5207
NODE_2845_length_2297_cov_0.530521_ID_5209
NODE_2847_length_2292_cov_0.65632_ID_5215
NODE_2851_length_2289_cov_0.559459_ID_5223
NODE_2853_length_2287_cov_0.482867_ID_5227
NODE_2854_length_2287_cov_0.716411_ID_5229
NODE_2855_length_2287_cov_0.48963_ID_5231
NODE_2856_length_2286_cov_0.467298_ID_5233
NODE_2857_length_2285_cov_0.486913_ID_5235
NODE_2859_length_2284_cov_0.586907_ID_5239
NODE_2861_length_2283_cov_0.475158_ID_5241
NODE_2862_length_2283_cov_1.15628_ID_5243
NODE_2866_length_2282_cov_0.485766_ID_5251
NODE_2868_length_2280_cov_1.06377_ID_5255
NODE_2871_length_2277_cov_0.40942_ID_5261
NODE_2872_length_2277_cov_0.61096_ID_5263
NODE_2873_length_2277_cov_0.67029_ID_5265
NODE_2874_length_2275_cov_0.69447_ID_5267
NODE_2875_length_2275_cov_0.388486_ID_5269
NODE_2876_length_2275_cov_0.924297_ID_5271
NODE_2879_length_2275_cov_0.518586_ID_5273
NODE_2880_length_2274_cov_0.791383_ID_5275
NODE_2881_length_2273_cov_0.490018_ID_5277
NODE_2883_length_2272_cov_0.464821_ID_5281
NODE_2884_length_2272_cov_0.861099_ID_5283
NODE_2885_length_2271_cov_0.545413_ID_5285
NODE_2886_length_2270_cov_0.583371_ID_5287
NODE_2888_length_2268_cov_0.653479_ID_5291
NODE_2890_length_2267_cov_0.677434_ID_5295
NODE_2891_length_2267_cov_0.696087_ID_5297
NODE_2892_length_2267_cov_0.44131_ID_5299
NODE_2893_length_2267_cov_0.608735_ID_5301
NODE_2894_length_2266_cov_0.467_ID_5303
NODE_2895_length_2266_cov_0.688211_ID_5305
NODE_2896_length_2265_cov_0.637067_ID_5307
NODE_2897_length_2265_cov_0.417577_ID_5309
NODE_2899_length_2264_cov_0.647836_ID_5313
NODE_2900_length_2263_cov_0.898815_ID_5315
NODE_2901_length_2263_cov_0.609845_ID_5317
NODE_2902_length_2261_cov_0.479927_ID_5319
NODE_2903_length_2261_cov_0.504562_ID_5321
NODE_2904_length_2261_cov_0.726277_ID_5323
NODE_2905_length_2260_cov_0.705157_ID_5325
NODE_2906_length_2259_cov_0.594521_ID_5327
NODE_2907_length_2259_cov_0.844749_ID_5329
NODE_2909_length_2258_cov_0.582915_ID_5333
NODE_2911_length_2257_cov_1.10923_ID_5337
NODE_2914_length_2256_cov_0.530407_ID_8235
NODE_2915_length_2256_cov_0.522176_ID_5343
NODE_2916_length_2256_cov_0.496571_ID_5345
NODE_2917_length_2256_cov_0.389118_ID_5347
NODE_2919_length_2254_cov_0.468192_ID_5351
NODE_2920_length_2254_cov_0.49016_ID_5353
NODE_2921_length_2253_cov_0.562729_ID_5355
NODE_2923_length_2252_cov_1.08887_ID_5359
NODE_2924_length_2252_cov_0.574439_ID_5361
NODE_2925_length_2251_cov_0.360678_ID_5363
NODE_2926_length_2251_cov_1.83272_ID_5365
NODE_2927_length_2251_cov_0.581577_ID_5367
NODE_2928_length_2250_cov_0.38331_ID_5369
NODE_2929_length_2250_cov_0.62265_ID_5371
NODE_2931_length_2248_cov_0.649839_ID_5375
NODE_2933_length_2248_cov_0.527765_ID_5379
NODE_2939_length_2246_cov_0.575563_ID_5389
NODE_2940_length_2246_cov_0.787781_ID_5391
NODE_2946_length_2243_cov_0.821527_ID_5403
NODE_2948_length_2241_cov_1.12523_ID_5405
NODE_2949_length_2240_cov_1.05205_ID_5407
NODE_2951_length_2238_cov_0.628861_ID_5409
NODE_2952_length_2238_cov_0.69894_ID_5411
NODE_2953_length_2237_cov_0.54428_ID_5413
NODE_2954_length_2237_cov_0.608395_ID_5415
NODE_2956_length_2237_cov_0.833948_ID_5419
NODE_2957_length_2237_cov_0.561347_ID_5421
NODE_2958_length_2236_cov_0.719889_ID_5423
NODE_2959_length_2236_cov_0.50946_ID_5425
NODE_2962_length_2233_cov_0.578558_ID_5431
NODE_2965_length_2232_cov_0.750809_ID_5437
NODE_2966_length_2232_cov_0.601017_ID_5439
NODE_2967_length_2231_cov_0.595745_ID_5441
NODE_2969_length_2231_cov_0.797872_ID_5443
NODE_2970_length_2230_cov_0.533087_ID_5445
NODE_2971_length_2230_cov_0.744563_ID_5447
NODE_2973_length_2230_cov_0.545118_ID_5451
NODE_2974_length_2227_cov_0.453197_ID_5453
NODE_2975_length_2227_cov_0.437905_ID_5455
NODE_2976_length_2226_cov_0.50255_ID_5457
NODE_2977_length_2225_cov_1.08163_ID_5459
NODE_2979_length_2223_cov_0.651811_ID_5463
NODE_2980_length_2223_cov_0.739554_ID_5465
NODE_2983_length_2222_cov_0.796098_ID_5471
NODE_2984_length_2222_cov_0.576405_ID_5473
NODE_2985_length_2221_cov_1.43309_ID_5475
NODE_2988_length_2219_cov_0.762326_ID_5481
NODE_2989_length_2219_cov_0.563721_ID_5483
NODE_2990_length_2219_cov_0.846047_ID_5485
NODE_2991_length_2216_cov_0.493712_ID_5487
NODE_2992_length_2216_cov_0.631113_ID_5489
NODE_2993_length_2216_cov_0.706102_ID_5491
NODE_2994_length_2216_cov_0.548673_ID_5493
NODE_2995_length_2215_cov_0.880708_ID_5497
NODE_2996_length_2215_cov_0.558714_ID_5499
NODE_2997_length_2215_cov_0.545666_ID_5501
NODE_2998_length_2215_cov_0.609972_ID_5503
NODE_3000_length_2214_cov_0.817249_ID_5507
NODE_3002_length_2214_cov_0.751049_ID_5511
NODE_3004_length_2214_cov_0.579021_ID_5515
NODE_3007_length_2213_cov_0.384795_ID_5517
NODE_3008_length_2213_cov_0.470616_ID_5519
NODE_3009_length_2213_cov_0.818097_ID_5521
NODE_3010_length_2213_cov_0.548974_ID_5523
NODE_3011_length_2213_cov_0.400653_ID_5525
NODE_3012_length_2211_cov_0.680205_ID_5527
NODE_3013_length_2211_cov_0.972456_ID_5529
NODE_3016_length_2210_cov_0.723494_ID_5535
NODE_3017_length_2210_cov_0.394675_ID_5537
NODE_3019_length_2209_cov_0.346262_ID_5541
NODE_3020_length_2209_cov_0.73271_ID_5543
NODE_3023_length_2206_cov_0.84511_ID_5547
NODE_3024_length_2206_cov_0.610669_ID_5549
NODE_3025_length_2206_cov_0.884885_ID_5551
NODE_3027_length_2205_cov_1.41011_ID_5555
NODE_3028_length_2204_cov_0.475878_ID_5557
NODE_3031_length_2201_cov_0.670263_ID_5563
NODE_3033_length_2200_cov_1.00657_ID_5567
NODE_3035_length_2199_cov_0.614554_ID_5571
NODE_3037_length_2198_cov_0.564115_ID_5575
NODE_3038_length_2198_cov_0.417097_ID_5577
NODE_3039_length_2196_cov_0.45275_ID_5579
NODE_3040_length_2196_cov_0.491772_ID_5581
NODE_3041_length_2196_cov_0.67607_ID_5583
NODE_3043_length_2194_cov_0.548706_ID_5587
NODE_3044_length_2194_cov_0.758588_ID_5589
NODE_3047_length_2191_cov_1.16305_ID_5593
NODE_3048_length_2190_cov_0.724187_ID_5595
NODE_3051_length_2189_cov_0.831132_ID_5601
NODE_3052_length_2189_cov_0.8_ID_5603
NODE_3053_length_2189_cov_0.525943_ID_5605
NODE_3054_length_2188_cov_0.319018_ID_5607
NODE_3055_length_2188_cov_0.607362_ID_5609
NODE_3056_length_2188_cov_0.667296_ID_5611
NODE_3057_length_2187_cov_0.779981_ID_5613
NODE_3059_length_2187_cov_0.430123_ID_5617
NODE_3060_length_2186_cov_0.588569_ID_5619
NODE_3064_length_2181_cov_0.606061_ID_5625
NODE_3065_length_2181_cov_0.684659_ID_5627
NODE_3066_length_2181_cov_0.507102_ID_5629
NODE_3068_length_2178_cov_0.389758_ID_5635
NODE_3070_length_2177_cov_0.592505_ID_5639
NODE_3071_length_2177_cov_0.705408_ID_5641
NODE_3075_length_2176_cov_0.826293_ID_5649
NODE_3076_length_2176_cov_0.758424_ID_5651
NODE_3078_length_2175_cov_0.488604_ID_5655
NODE_3079_length_2173_cov_0.518536_ID_5659
NODE_3080_length_2173_cov_0.434411_ID_5661
NODE_3081_length_2172_cov_0.432715_ID_5663
NODE_3082_length_2172_cov_0.80504_ID_5665
NODE_3083_length_2172_cov_0.863528_ID_5667
NODE_3086_length_2171_cov_1.13844_ID_5673
NODE_3088_length_2171_cov_0.789724_ID_5677
NODE_3089_length_2170_cov_0.39981_ID_5679
NODE_3090_length_2169_cov_0.424762_ID_5681
NODE_3091_length_2169_cov_0.49_ID_5683
NODE_3092_length_2169_cov_0.631905_ID_5685
NODE_3094_length_2167_cov_0.84652_ID_5687
NODE_3097_length_2165_cov_0.868798_ID_5693
NODE_3098_length_2165_cov_0.534828_ID_5695
NODE_3100_length_2164_cov_0.621002_ID_5699
NODE_3101_length_2164_cov_0.781384_ID_5701
NODE_3102_length_2162_cov_0.622551_ID_5703
NODE_3107_length_2161_cov_0.626195_ID_5713
NODE_3109_length_2159_cov_0.498086_ID_5719
NODE_3110_length_2158_cov_0.59933_ID_5721
NODE_3111_length_2158_cov_0.741503_ID_5723
NODE_3112_length_2157_cov_0.693966_ID_5725
NODE_3113_length_2157_cov_0.489464_ID_5727
NODE_3114_length_2156_cov_0.404887_ID_5729
NODE_3115_length_2156_cov_0.453282_ID_5731
NODE_3116_length_2156_cov_1.12171_ID_5733
NODE_3117_length_2156_cov_0.673215_ID_5735
NODE_3118_length_2154_cov_0.519424_ID_5737
NODE_3119_length_2154_cov_0.588969_ID_5739
NODE_3120_length_2153_cov_0.546065_ID_5741
NODE_3122_length_2152_cov_0.390783_ID_5745
NODE_3123_length_2152_cov_0.574172_ID_5747
NODE_3125_length_2151_cov_0.474063_ID_5751
NODE_3126_length_2151_cov_1.15418_ID_5753
NODE_3128_length_2150_cov_0.476694_ID_5757
NODE_3129_length_2150_cov_0.394041_ID_5759
NODE_3131_length_2149_cov_0.534615_ID_5763
NODE_3133_length_2148_cov_0.618086_ID_5765
NODE_3135_length_2147_cov_0.433109_ID_5769
NODE_3136_length_2146_cov_0.830525_ID_5771
NODE_3137_length_2145_cov_0.695087_ID_5773
NODE_3138_length_2144_cov_0.383614_ID_5775
NODE_3139_length_2143_cov_0.629219_ID_5777
NODE_3140_length_2143_cov_0.624397_ID_5779
NODE_3141_length_2143_cov_0.463356_ID_5781
NODE_3142_length_2143_cov_0.663452_ID_24085
NODE_3146_length_2140_cov_0.41043_ID_5787
NODE_3148_length_2138_cov_0.853552_ID_5791
NODE_3151_length_2136_cov_1.44702_ID_5797
NODE_3152_length_2136_cov_0.477987_ID_5799
NODE_3154_length_2135_cov_0.335431_ID_5803
NODE_3158_length_2133_cov_0.469477_ID_5809
NODE_3159_length_2133_cov_0.828973_ID_5811
NODE_3160_length_2133_cov_0.53343_ID_5813
NODE_3163_length_2132_cov_0.666505_ID_5817
NODE_3164_length_2132_cov_0.799806_ID_5819
NODE_3166_length_2131_cov_0.443259_ID_5823
NODE_3167_length_2130_cov_0.514313_ID_5825
NODE_3168_length_2130_cov_0.812227_ID_5827
NODE_3171_length_2129_cov_0.498544_ID_5833
NODE_3175_length_2127_cov_0.561224_ID_5843
NODE_3177_length_2126_cov_0.458435_ID_5847
NODE_3178_length_2126_cov_0.636364_ID_5849
NODE_3179_length_2126_cov_0.467185_ID_5851
NODE_3180_length_2124_cov_0.579075_ID_5853
NODE_3181_length_2124_cov_0.707056_ID_5855
NODE_3183_length_2124_cov_0.331387_ID_5859
NODE_3185_length_2123_cov_0.994158_ID_5861
NODE_3190_length_2118_cov_0.475354_ID_5871
NODE_3191_length_2118_cov_0.468521_ID_5873
NODE_3192_length_2116_cov_0.742062_ID_5875
NODE_3194_length_2114_cov_0.685575_ID_5879
NODE_3195_length_2114_cov_0.727139_ID_5881
NODE_3198_length_2112_cov_0.827215_ID_5887
NODE_3199_length_2112_cov_0.914831_ID_5889
NODE_3201_length_2111_cov_0.339373_ID_5893
NODE_3202_length_2111_cov_0.665524_ID_5895
NODE_3203_length_2111_cov_0.461802_ID_5897
NODE_3205_length_2111_cov_0.72331_ID_5901
NODE_3206_length_2109_cov_0.619608_ID_5903
NODE_3214_length_2107_cov_0.392542_ID_5917
NODE_3215_length_2107_cov_0.783611_ID_5919
NODE_3216_length_2107_cov_0.763984_ID_5921
NODE_3217_length_2105_cov_0.651768_ID_5923
NODE_3218_length_2105_cov_0.443517_ID_5925
NODE_3220_length_2105_cov_0.548625_ID_5929
NODE_3221_length_2105_cov_0.387033_ID_5931
NODE_3222_length_2104_cov_0.534152_ID_5933
NODE_3223_length_2104_cov_0.372482_ID_5935
NODE_3224_length_2103_cov_0.390855_ID_5937
NODE_3226_length_2102_cov_0.696016_ID_5941
NODE_3227_length_2101_cov_0.477854_ID_5943
NODE_3228_length_2101_cov_1.01181_ID_5945
NODE_3229_length_2101_cov_0.778051_ID_5947
NODE_3231_length_2101_cov_0.656988_ID_5951
NODE_3234_length_2100_cov_0.883309_ID_5955
NODE_3235_length_2099_cov_0.563054_ID_5957
NODE_3236_length_2099_cov_0.50936_ID_5959
NODE_3237_length_2099_cov_0.727094_ID_5961
NODE_3238_length_2098_cov_0.500739_ID_5963
NODE_3239_length_2098_cov_0.631838_ID_5965
NODE_3240_length_2096_cov_0.48742_ID_5967
NODE_3241_length_2096_cov_0.359151_ID_5969
NODE_3243_length_2095_cov_0.7231_ID_5973
NODE_3244_length_2093_cov_1.61018_ID_5975
NODE_3249_length_2092_cov_1.01582_ID_5985
NODE_3250_length_2091_cov_0.504946_ID_5987
NODE_3253_length_2090_cov_1.10737_ID_5991
NODE_3254_length_2090_cov_0.588323_ID_5993
NODE_3255_length_2090_cov_1.02425_ID_5995
NODE_3256_length_2089_cov_0.818317_ID_5997
NODE_3257_length_2088_cov_0.594849_ID_5999
NODE_3258_length_2087_cov_0.583746_ID_6001
NODE_3259_length_2086_cov_0.674765_ID_6003
NODE_3260_length_2086_cov_0.411502_ID_6005
NODE_3262_length_2085_cov_0.587302_ID_6009
NODE_3264_length_2085_cov_0.839286_ID_6013
NODE_3265_length_2084_cov_0.743921_ID_6015
NODE_3267_length_2084_cov_1.33002_ID_6019
NODE_3268_length_2083_cov_0.782522_ID_6021
NODE_3272_length_2081_cov_0.744036_ID_6027
NODE_3273_length_2081_cov_0.597416_ID_6029
NODE_3275_length_2080_cov_0.600696_ID_6033
NODE_3276_length_2078_cov_0.692384_ID_6035
NODE_3277_length_2078_cov_0.491289_ID_13447
NODE_3280_length_2075_cov_0.758724_ID_6037
NODE_3285_length_2074_cov_0.543641_ID_8525
NODE_3286_length_2074_cov_0.905237_ID_6047
NODE_3287_length_2074_cov_0.926185_ID_6049
NODE_3289_length_2072_cov_0.430854_ID_10783
NODE_3290_length_2072_cov_0.519221_ID_6053
NODE_3291_length_2072_cov_0.483275_ID_6055
NODE_3292_length_2071_cov_0.745255_ID_6057
NODE_3294_length_2070_cov_0.807596_ID_6059
NODE_3298_length_2068_cov_0.385693_ID_6065
NODE_3299_length_2067_cov_1.26577_ID_6067
NODE_3301_length_2066_cov_0.581372_ID_6071
NODE_3302_length_2066_cov_0.445669_ID_6073
NODE_3304_length_2066_cov_1.63045_ID_6077
NODE_3305_length_2065_cov_0.543587_ID_6079
NODE_3307_length_2065_cov_0.426854_ID_6083
NODE_3308_length_2065_cov_0.604709_ID_6085
NODE_3310_length_2063_cov_1.22818_ID_6089
NODE_3311_length_2062_cov_0.762168_ID_6091
NODE_3314_length_2061_cov_0.628514_ID_6095
NODE_3315_length_2061_cov_0.575301_ID_6097
NODE_3316_length_2061_cov_0.751506_ID_6099
NODE_3318_length_2060_cov_0.447514_ID_6103
NODE_3321_length_2059_cov_0.418593_ID_6107
NODE_3322_length_2059_cov_0.7_ID_6109
NODE_3323_length_2057_cov_0.586519_ID_6111
NODE_3324_length_2057_cov_0.997988_ID_6113
NODE_3325_length_2057_cov_0.801308_ID_6115
NODE_3326_length_2057_cov_0.477867_ID_6117
NODE_3327_length_2056_cov_0.874685_ID_12401
NODE_3328_length_2055_cov_0.635448_ID_6121
NODE_3329_length_2055_cov_0.63998_ID_6123
NODE_3330_length_2055_cov_0.765861_ID_6125
NODE_3331_length_2055_cov_0.854481_ID_6127
NODE_3334_length_2055_cov_0.445619_ID_6133
NODE_3335_length_2054_cov_0.728463_ID_6135
NODE_3336_length_2052_cov_0.526475_ID_6137
NODE_3337_length_2051_cov_0.724521_ID_6139
NODE_3338_length_2051_cov_0.509082_ID_6141
NODE_3339_length_2051_cov_0.402119_ID_6143
NODE_3341_length_2050_cov_0.603231_ID_6147
NODE_3342_length_2049_cov_0.744444_ID_6149
NODE_3343_length_2048_cov_0.817585_ID_6151
NODE_3345_length_2048_cov_0.586155_ID_6153
NODE_3347_length_2047_cov_0.552073_ID_6157
NODE_3348_length_2047_cov_0.676946_ID_6159
NODE_3349_length_2047_cov_0.404449_ID_6161
NODE_3352_length_2046_cov_0.697521_ID_6167
NODE_3354_length_2044_cov_0.642532_ID_6171
NODE_3356_length_2044_cov_0.383797_ID_6173
NODE_3357_length_2040_cov_0.73313_ID_6175
NODE_3358_length_2040_cov_0.805175_ID_6177
NODE_3360_length_2039_cov_0.667005_ID_6179
NODE_3361_length_2039_cov_0.691371_ID_6181
NODE_3364_length_2038_cov_0.475876_ID_6187
NODE_3365_length_2037_cov_1.40447_ID_6189
NODE_3366_length_2037_cov_0.423272_ID_6191
NODE_3368_length_2036_cov_0.733604_ID_6195
NODE_3369_length_2036_cov_0.726995_ID_6197
NODE_3370_length_2035_cov_0.497457_ID_6199
NODE_3372_length_2035_cov_0.5_ID_6203
NODE_3374_length_2034_cov_0.589822_ID_6207
NODE_3375_length_2034_cov_0.905852_ID_6209
NODE_3376_length_2034_cov_0.768448_ID_6211
NODE_3377_length_2033_cov_0.655295_ID_6213
NODE_3378_length_2033_cov_1.02699_ID_6215
NODE_3379_length_2033_cov_0.76833_ID_6217
NODE_3381_length_2032_cov_0.53999_ID_6221
NODE_3382_length_2032_cov_1.1783_ID_6223
NODE_3383_length_2032_cov_0.769231_ID_6225
NODE_3384_length_2031_cov_0.473496_ID_6227
NODE_3385_length_2031_cov_0.594801_ID_6229
NODE_3386_length_2031_cov_0.615189_ID_6231
NODE_3387_length_2031_cov_0.755352_ID_6233
NODE_3388_length_2030_cov_0.550739_ID_6235
NODE_3389_length_2030_cov_0.560938_ID_6237
NODE_338_length_16849_cov_1.22998_ID_645
NODE_3390_length_2030_cov_0.6359_ID_6239
NODE_3391_length_2030_cov_0.591025_ID_6241
NODE_3392_length_2030_cov_0.757267_ID_30357
NODE_3393_length_2030_cov_0.381948_ID_6243
NODE_3394_length_2029_cov_0.846939_ID_6245
NODE_3395_length_2029_cov_0.755612_ID_6247
NODE_3396_length_2029_cov_0.436735_ID_6249
NODE_3398_length_2028_cov_0.723328_ID_6253
NODE_3399_length_2028_cov_0.768249_ID_6255
NODE_3400_length_2026_cov_0.345427_ID_6257
NODE_3402_length_2024_cov_0.412276_ID_6261
NODE_3403_length_2024_cov_0.649616_ID_6263
NODE_3406_length_2022_cov_0.776754_ID_6267
NODE_3410_length_2021_cov_0.584529_ID_6275
NODE_3412_length_2021_cov_0.423156_ID_6277
NODE_3413_length_2021_cov_0.86373_ID_6279
NODE_3414_length_2020_cov_0.840595_ID_6281
NODE_3416_length_2020_cov_0.730395_ID_6285
NODE_3418_length_2019_cov_0.434359_ID_6289
NODE_3419_length_2019_cov_0.55641_ID_6291
NODE_3420_length_2019_cov_0.561538_ID_6293
NODE_3421_length_2019_cov_0.661026_ID_6295
NODE_3422_length_2019_cov_0.493846_ID_6297
NODE_3423_length_2018_cov_0.926116_ID_6299
NODE_3424_length_2018_cov_0.527963_ID_6301
NODE_3425_length_2018_cov_0.558235_ID_6303
NODE_3426_length_2018_cov_0.601334_ID_6305
NODE_3427_length_2016_cov_0.701079_ID_6307
NODE_3428_length_2015_cov_0.361768_ID_6309
NODE_3430_length_2015_cov_0.766701_ID_6313
NODE_3431_length_2014_cov_0.482262_ID_6315
NODE_3432_length_2014_cov_0.701285_ID_6317
NODE_3433_length_2014_cov_1.15373_ID_6319
NODE_3434_length_2014_cov_0.60874_ID_6321
NODE_3436_length_2013_cov_0.723765_ID_6325
NODE_3437_length_2013_cov_0.605453_ID_6327
NODE_3438_length_2013_cov_0.554012_ID_6329
NODE_3440_length_2012_cov_1.06536_ID_6333
NODE_3441_length_2011_cov_0.477343_ID_6335
NODE_3442_length_2011_cov_0.605046_ID_6337
NODE_3445_length_2010_cov_0.640907_ID_6343
NODE_3447_length_2009_cov_0.815979_ID_6347
NODE_3449_length_2008_cov_0.456937_ID_6349
NODE_3451_length_2007_cov_1.24716_ID_6353
NODE_3452_length_2007_cov_0.940144_ID_6355
NODE_3453_length_2007_cov_0.293086_ID_6357
NODE_3454_length_2007_cov_0.595975_ID_6359
NODE_3455_length_2006_cov_0.37429_ID_6361
NODE_3456_length_2006_cov_0.635003_ID_6363
NODE_3457_length_2005_cov_0.436983_ID_6365
NODE_3458_length_2005_cov_0.672004_ID_6367
NODE_3459_length_2004_cov_0.697674_ID_6369
NODE_3460_length_2004_cov_0.41447_ID_6371
NODE_3461_length_2003_cov_0.823681_ID_6373
NODE_3462_length_2003_cov_0.740951_ID_6375
NODE_3464_length_2001_cov_0.573499_ID_6379
NODE_3466_length_2001_cov_0.446687_ID_6381
NODE_3468_length_2001_cov_0.468944_ID_6385
NODE_3469_length_2000_cov_0.54117_ID_6387
NODE_3470_length_2000_cov_0.686691_ID_6389
NODE_3471_length_2000_cov_0.750388_ID_6391
NODE_3474_length_1999_cov_0.382902_ID_6397
NODE_3478_length_1997_cov_0.646784_ID_6405
NODE_3480_length_1997_cov_0.705394_ID_58929
NODE_3481_length_1997_cov_0.439834_ID_6409
NODE_3484_length_1995_cov_0.584631_ID_6415
NODE_3485_length_1994_cov_0.686753_ID_6417
NODE_3486_length_1994_cov_1.19429_ID_6419
NODE_3487_length_1993_cov_0.763514_ID_6421
NODE_3488_length_1993_cov_0.615385_ID_6423
NODE_3489_length_1993_cov_0.550936_ID_6425
NODE_3491_length_1992_cov_0.332813_ID_6427
NODE_3492_length_1992_cov_0.395736_ID_6429
NODE_3494_length_1990_cov_0.641333_ID_6433
NODE_3495_length_1989_cov_0.846354_ID_6435
NODE_3496_length_1989_cov_0.657292_ID_6437
NODE_3498_length_1988_cov_0.700365_ID_6439
NODE_3499_length_1988_cov_1.27514_ID_6441
NODE_3500_length_1988_cov_0.513288_ID_6443
NODE_3503_length_1986_cov_0.450183_ID_6449
NODE_3504_length_1986_cov_0.455399_ID_6451
NODE_3505_length_1985_cov_0.637787_ID_6453
NODE_3508_length_1984_cov_0.436554_ID_6459
NODE_3509_length_1983_cov_0.421108_ID_6461
NODE_3510_length_1982_cov_0.789336_ID_6463
NODE_3511_length_1981_cov_1.00052_ID_6465
NODE_3514_length_1981_cov_0.741109_ID_6469
NODE_3515_length_1980_cov_0.580848_ID_6471
NODE_3516_length_1980_cov_0.326007_ID_6473
NODE_3517_length_1979_cov_0.487435_ID_6475
NODE_3518_length_1979_cov_1.05236_ID_6477
NODE_3519_length_1979_cov_1.8534_ID_6479
NODE_3521_length_1978_cov_0.68989_ID_6483
NODE_3522_length_1978_cov_0.412258_ID_6485
NODE_3523_length_1978_cov_0.946045_ID_6487
NODE_3525_length_1977_cov_0.384172_ID_6491
NODE_3526_length_1977_cov_0.603249_ID_6493
NODE_3529_length_1977_cov_0.401468_ID_6499
NODE_3530_length_1976_cov_0.788149_ID_6501
NODE_3531_length_1976_cov_0.682748_ID_6503
NODE_3533_length_1976_cov_0.478238_ID_6507
NODE_3534_length_1975_cov_0.833158_ID_27963
NODE_3535_length_1975_cov_0.486359_ID_6509
NODE_3536_length_1974_cov_0.533333_ID_6511
NODE_3537_length_1974_cov_0.530184_ID_6513
NODE_3538_length_1973_cov_0.673845_ID_6515
NODE_3539_length_1972_cov_0.358907_ID_6517
NODE_3541_length_1972_cov_0.52969_ID_6521
NODE_3542_length_1972_cov_0.368366_ID_6523
NODE_3543_length_1972_cov_0.423016_ID_6525
NODE_3544_length_1971_cov_0.546267_ID_6527
NODE_3545_length_1970_cov_0.64808_ID_6529
NODE_3546_length_1970_cov_0.278275_ID_6531
NODE_3547_length_1970_cov_0.4303_ID_6533
NODE_3548_length_1969_cov_0.997895_ID_6535
NODE_3549_length_1969_cov_0.595789_ID_6537
NODE_3551_length_1969_cov_1.29895_ID_6541
NODE_3553_length_1968_cov_0.733544_ID_6543
NODE_3554_length_1968_cov_0.977357_ID_6545
NODE_3556_length_1967_cov_0.56059_ID_6549
NODE_3561_length_1964_cov_0.539842_ID_6559
NODE_3562_length_1963_cov_0.451954_ID_6561
NODE_3563_length_1963_cov_0.732313_ID_6563
NODE_3564_length_1962_cov_0.566825_ID_6565
NODE_3566_length_1961_cov_0.466702_ID_6569
NODE_3567_length_1961_cov_0.530127_ID_6571
NODE_3570_length_1960_cov_0.671602_ID_6577
NODE_3572_length_1958_cov_0.443092_ID_6581
NODE_3575_length_1957_cov_0.482521_ID_6587
NODE_3576_length_1957_cov_0.527542_ID_6589
NODE_3578_length_1957_cov_0.518538_ID_6593
NODE_3580_length_1957_cov_0.725636_ID_6595
NODE_3582_length_1956_cov_1.20032_ID_6599
NODE_3585_length_1954_cov_0.732095_ID_6605
NODE_3586_length_1954_cov_0.685411_ID_6609
NODE_3589_length_1952_cov_0.349973_ID_6615
NODE_3590_length_1952_cov_0.759958_ID_6617
NODE_3592_length_1951_cov_0.433581_ID_6621
NODE_3596_length_1949_cov_0.480319_ID_6629
NODE_3598_length_1949_cov_0.412234_ID_6633
NODE_3600_length_1948_cov_0.351783_ID_6637
NODE_3601_length_1948_cov_0.68281_ID_6639
NODE_3602_length_1948_cov_0.420436_ID_6641
NODE_3603_length_1948_cov_0.627461_ID_6643
NODE_3604_length_1947_cov_0.576145_ID_6645
NODE_3605_length_1947_cov_0.455272_ID_6647
NODE_3606_length_1947_cov_0.559105_ID_6649
NODE_3607_length_1946_cov_0.669686_ID_6651
NODE_3608_length_1945_cov_0.672175_ID_6653
NODE_3609_length_1945_cov_0.750533_ID_6655
NODE_3610_length_1944_cov_0.741333_ID_6657
NODE_3611_length_1944_cov_0.349867_ID_6659
NODE_3613_length_1944_cov_0.571733_ID_6663
NODE_3614_length_1944_cov_0.744_ID_6665
NODE_3615_length_1943_cov_0.396478_ID_6667
NODE_3616_length_1942_cov_0.510411_ID_6669
NODE_3617_length_1942_cov_0.379605_ID_6671
NODE_3619_length_1942_cov_0.522691_ID_6675
NODE_3621_length_1942_cov_0.501869_ID_6679
NODE_3622_length_1941_cov_0.393697_ID_6681
NODE_3623_length_1941_cov_0.334402_ID_6683
NODE_3626_length_1940_cov_0.566542_ID_6689
NODE_3627_length_1940_cov_0.553715_ID_6691
NODE_3628_length_1940_cov_0.701764_ID_6693
NODE_3630_length_1939_cov_0.881283_ID_6697
NODE_3632_length_1937_cov_0.584582_ID_6701
NODE_3633_length_1936_cov_0.442421_ID_6703
NODE_3634_length_1936_cov_0.914301_ID_6705
NODE_3635_length_1935_cov_0.778135_ID_6707
NODE_3637_length_1934_cov_0.736193_ID_6711
NODE_3640_length_1933_cov_0.504292_ID_6715
NODE_3641_length_1932_cov_0.779388_ID_6717
NODE_3642_length_1932_cov_0.609232_ID_6719
NODE_3644_length_1931_cov_0.503759_ID_6723
NODE_3645_length_1931_cov_0.422664_ID_6725
NODE_3647_length_1930_cov_0.726491_ID_6729
NODE_3648_length_1929_cov_0.426344_ID_9359
NODE_3649_length_1929_cov_0.588172_ID_6731
NODE_3650_length_1928_cov_0.732652_ID_6733
NODE_3652_length_1927_cov_0.396663_ID_6737
NODE_3653_length_1926_cov_0.464728_ID_6739
NODE_3654_length_1926_cov_0.965536_ID_6741
NODE_3655_length_1926_cov_0.605816_ID_6743
NODE_3656_length_1926_cov_0.634895_ID_6745
NODE_3660_length_1925_cov_0.574353_ID_6751
NODE_3661_length_1924_cov_0.383288_ID_6753
NODE_3662_length_1923_cov_0.410464_ID_6755
NODE_3664_length_1922_cov_0.642202_ID_6759
NODE_3666_length_1921_cov_0.527538_ID_6763
NODE_3668_length_1921_cov_0.462743_ID_6767
NODE_3670_length_1920_cov_0.672069_ID_6771
NODE_3672_length_1919_cov_0.554054_ID_6775
NODE_3673_length_1919_cov_1.0627_ID_6777
NODE_3675_length_1917_cov_0.63474_ID_6781
NODE_3677_length_1917_cov_0.4329_ID_6785
NODE_3681_length_1912_cov_0.326641_ID_6791
NODE_3682_length_1911_cov_0.57709_ID_6795
NODE_3685_length_1911_cov_0.380022_ID_6801
NODE_3686_length_1910_cov_0.258555_ID_6803
NODE_3687_length_1910_cov_0.50679_ID_6805
NODE_3689_length_1910_cov_0.68604_ID_6807
NODE_3690_length_1910_cov_0.670831_ID_8111
NODE_3691_length_1909_cov_0.858152_ID_6809
NODE_3693_length_1909_cov_0.503261_ID_6811
NODE_3694_length_1909_cov_0.564674_ID_6813
NODE_3695_length_1908_cov_0.666667_ID_6815
NODE_3698_length_1908_cov_0.997281_ID_6819
NODE_3699_length_1908_cov_0.415987_ID_6821
NODE_3700_length_1907_cov_1.19695_ID_6823
NODE_3701_length_1907_cov_0.514146_ID_6825
NODE_3703_length_1906_cov_0.488841_ID_6827
NODE_3705_length_1905_cov_0.63671_ID_6829
NODE_3706_length_1905_cov_0.466231_ID_6831
NODE_3707_length_1904_cov_0.613624_ID_6833
NODE_3708_length_1904_cov_0.496458_ID_6835
NODE_3709_length_1904_cov_0.767847_ID_6837
NODE_3710_length_1903_cov_0.470011_ID_6839
NODE_3712_length_1903_cov_0.386587_ID_6843
NODE_3713_length_1902_cov_0.530824_ID_6845
NODE_3714_length_1902_cov_0.781779_ID_6847
NODE_3715_length_1902_cov_0.484997_ID_6849
NODE_3717_length_1902_cov_0.454446_ID_6851
NODE_3720_length_1899_cov_0.74918_ID_6855
NODE_3721_length_1899_cov_0.977049_ID_6857
NODE_3722_length_1899_cov_0.785792_ID_6859
NODE_3723_length_1899_cov_1.01202_ID_6861
NODE_3724_length_1899_cov_0.683607_ID_6863
NODE_3725_length_1898_cov_1.0339_ID_6865
NODE_3726_length_1898_cov_0.436304_ID_6867
NODE_3728_length_1898_cov_0.449973_ID_6871
NODE_3729_length_1898_cov_0.655003_ID_6873
NODE_3731_length_1897_cov_0.407549_ID_6877
NODE_3732_length_1897_cov_0.642779_ID_6879
NODE_3734_length_1896_cov_0.657909_ID_6885
NODE_3736_length_1895_cov_0.411281_ID_6889
NODE_3737_length_1895_cov_0.702629_ID_6891
NODE_3741_length_1895_cov_1.15936_ID_6899
NODE_3744_length_1893_cov_0.385965_ID_6901
NODE_3745_length_1892_cov_0.466264_ID_6903
NODE_3746_length_1892_cov_0.697751_ID_6905
NODE_3747_length_1892_cov_0.557872_ID_6907
NODE_3748_length_1891_cov_0.425906_ID_6909
NODE_3749_length_1891_cov_0.346323_ID_6911
NODE_3752_length_1890_cov_0.434377_ID_6915
NODE_3753_length_1890_cov_0.488742_ID_6917
NODE_3755_length_1890_cov_0.388248_ID_6921
NODE_3756_length_1890_cov_0.757276_ID_6923
NODE_3757_length_1889_cov_0.482418_ID_6925
NODE_3758_length_1889_cov_0.413736_ID_6927
NODE_3759_length_1889_cov_0.687363_ID_6929
NODE_3761_length_1888_cov_0.368884_ID_6933
NODE_3762_length_1888_cov_0.544805_ID_6935
NODE_3763_length_1887_cov_0.782728_ID_6937
NODE_3764_length_1886_cov_0.462851_ID_6939
NODE_3765_length_1886_cov_0.58393_ID_6941
NODE_3766_length_1886_cov_1.03908_ID_6943
NODE_3768_length_1885_cov_0.386564_ID_6947
NODE_3769_length_1885_cov_0.844163_ID_6949
NODE_3772_length_1884_cov_0.716804_ID_6955
NODE_3773_length_1884_cov_0.428099_ID_6957
NODE_3774_length_1884_cov_0.666116_ID_6959
NODE_3775_length_1883_cov_0.561191_ID_6961
NODE_3777_length_1883_cov_0.514333_ID_6965
NODE_3778_length_1883_cov_0.374311_ID_6967
NODE_3781_length_1882_cov_0.856591_ID_6971
NODE_3782_length_1882_cov_0.875896_ID_6973
NODE_3783_length_1882_cov_0.462217_ID_6975
NODE_3784_length_1881_cov_0.385762_ID_6977
NODE_3785_length_1881_cov_0.621965_ID_6979
NODE_3786_length_1881_cov_0.75883_ID_6981
NODE_3787_length_1880_cov_0.47598_ID_6983
NODE_3788_length_1880_cov_0.753727_ID_6985
NODE_3789_length_1880_cov_0.654887_ID_6987
NODE_3790_length_1880_cov_1.05246_ID_6989
NODE_3791_length_1879_cov_0.534807_ID_6991
NODE_3792_length_1879_cov_0.744751_ID_6993
NODE_3793_length_1878_cov_0.70702_ID_6995
NODE_3795_length_1877_cov_0.554757_ID_6999
NODE_3796_length_1875_cov_0.380952_ID_7001
NODE_3797_length_1874_cov_0.535734_ID_7003
NODE_3798_length_1874_cov_0.488643_ID_7005
NODE_3799_length_1874_cov_0.845983_ID_7007
NODE_3800_length_1874_cov_0.334072_ID_7009
NODE_3801_length_1873_cov_0.391907_ID_7011
NODE_3802_length_1873_cov_0.501663_ID_7013
NODE_3804_length_1872_cov_0.393788_ID_7015
NODE_3805_length_1872_cov_0.420965_ID_7017
NODE_3808_length_1871_cov_0.519978_ID_7023
NODE_3809_length_1871_cov_0.518313_ID_7025
NODE_380_length_15183_cov_0.853844_ID_721
NODE_3810_length_1871_cov_0.45505_ID_7027
NODE_3811_length_1870_cov_0.460855_ID_7029
NODE_3812_length_1870_cov_0.785119_ID_7031
NODE_3813_length_1870_cov_0.541921_ID_7033
NODE_3814_length_1870_cov_1.15158_ID_7035
NODE_3815_length_1870_cov_0.641866_ID_7037
NODE_3816_length_1870_cov_0.313715_ID_7039
NODE_3817_length_1869_cov_0.554444_ID_7041
NODE_3818_length_1869_cov_0.525_ID_7043
NODE_3820_length_1868_cov_0.612563_ID_7047
NODE_3821_length_1868_cov_0.690939_ID_7049
NODE_3823_length_1867_cov_0.621246_ID_7053
NODE_3824_length_1867_cov_0.639043_ID_7055
NODE_3825_length_1867_cov_0.335929_ID_7057
NODE_3826_length_1867_cov_0.57564_ID_7059
NODE_3827_length_1866_cov_0.497496_ID_7061
NODE_3828_length_1866_cov_0.838063_ID_7063
NODE_3829_length_1866_cov_0.322204_ID_7065
NODE_3830_length_1866_cov_0.4936_ID_7067
NODE_3831_length_1865_cov_0.876949_ID_7069
NODE_3832_length_1865_cov_0.48441_ID_7071
NODE_3833_length_1865_cov_0.605791_ID_7073
NODE_3837_length_1863_cov_0.439242_ID_7079
NODE_3838_length_1863_cov_0.491081_ID_7081
NODE_3840_length_1863_cov_0.407469_ID_7085
NODE_3842_length_1863_cov_1.18339_ID_7089
NODE_3844_length_1862_cov_0.413274_ID_7093
NODE_3845_length_1862_cov_0.525376_ID_7095
NODE_3846_length_1862_cov_0.334635_ID_7097
NODE_3847_length_1862_cov_0.450084_ID_7099
NODE_3848_length_1861_cov_0.5625_ID_7101
NODE_3849_length_1861_cov_0.573103_ID_7103
NODE_3851_length_1859_cov_1.18939_ID_7107
NODE_3852_length_1858_cov_0.52711_ID_7109
NODE_3853_length_1858_cov_0.619899_ID_7111
NODE_3855_length_1857_cov_0.431767_ID_7115
NODE_3857_length_1855_cov_0.462486_ID_7119
NODE_3858_length_1855_cov_0.635498_ID_7121
NODE_3859_length_1855_cov_0.470885_ID_7123
NODE_3860_length_1854_cov_0.631933_ID_7125
NODE_3861_length_1854_cov_0.743417_ID_7127
NODE_3862_length_1854_cov_0.622969_ID_7129
NODE_3863_length_1854_cov_0.49916_ID_7131
NODE_3864_length_1854_cov_0.708123_ID_7133
NODE_3865_length_1853_cov_0.476457_ID_7135
NODE_3866_length_1853_cov_0.613789_ID_7137
NODE_3867_length_1853_cov_0.376121_ID_7139
NODE_3868_length_1852_cov_0.797532_ID_7141
NODE_3869_length_1852_cov_0.537858_ID_7143
NODE_3870_length_1852_cov_0.456534_ID_7145
NODE_3871_length_1852_cov_0.765564_ID_7147
NODE_3872_length_1851_cov_0.640292_ID_7149
NODE_3875_length_1850_cov_0.434587_ID_7153
NODE_3877_length_1850_cov_0.398652_ID_7157
NODE_3878_length_1850_cov_0.468276_ID_7159
NODE_3879_length_1850_cov_0.987086_ID_7161
NODE_3880_length_1850_cov_0.603032_ID_7163
NODE_3881_length_1850_cov_0.360472_ID_7165
NODE_3882_length_1849_cov_0.742135_ID_7167
NODE_3883_length_1849_cov_0.416292_ID_7169
NODE_3884_length_1849_cov_0.83427_ID_7171
NODE_3885_length_1849_cov_0.63764_ID_7173
NODE_3887_length_1848_cov_0.354132_ID_7175
NODE_3889_length_1847_cov_0.685039_ID_7177
NODE_3890_length_1847_cov_0.410011_ID_7179
NODE_3891_length_1847_cov_0.246907_ID_7181
NODE_3892_length_1847_cov_0.555681_ID_7185
NODE_3893_length_1846_cov_0.658976_ID_7187
NODE_3894_length_1846_cov_0.561621_ID_7189
NODE_3895_length_1846_cov_0.64547_ID_7191
NODE_3896_length_1846_cov_0.601013_ID_7193
NODE_3897_length_1846_cov_0.76027_ID_7195
NODE_3898_length_1845_cov_0.885135_ID_7197
NODE_3899_length_1844_cov_0.572958_ID_7199
NODE_3900_length_1844_cov_0.510986_ID_7201
NODE_3901_length_1844_cov_0.744225_ID_7203
NODE_3902_length_1843_cov_0.366404_ID_7205
NODE_3903_length_1843_cov_0.727734_ID_7207
NODE_3904_length_1843_cov_0.685457_ID_7209
NODE_3905_length_1843_cov_0.492672_ID_7211
NODE_3907_length_1842_cov_0.491258_ID_7215
NODE_3908_length_1842_cov_0.621545_ID_7217
NODE_3909_length_1841_cov_0.573363_ID_7219
NODE_3911_length_1841_cov_0.845937_ID_7223
NODE_3912_length_1839_cov_0.667797_ID_7225
NODE_3913_length_1839_cov_0.529944_ID_7227
NODE_3914_length_1838_cov_0.695308_ID_7229
NODE_3915_length_1838_cov_0.373657_ID_7231
NODE_3916_length_1838_cov_0.539853_ID_7233
NODE_3917_length_1838_cov_0.695873_ID_7235
NODE_3918_length_1838_cov_0.790277_ID_7237
NODE_3919_length_1838_cov_0.341436_ID_7239
NODE_3920_length_1837_cov_0.574661_ID_7241
NODE_3921_length_1836_cov_0.52292_ID_7243
NODE_3922_length_1836_cov_0.514997_ID_7245
NODE_3924_length_1835_cov_0.815402_ID_7249
NODE_3925_length_1835_cov_0.558324_ID_7251
NODE_3926_length_1834_cov_0.68272_ID_7253
NODE_3928_length_1834_cov_0.592635_ID_7257
NODE_3929_length_1834_cov_0.489518_ID_7259
NODE_3930_length_1834_cov_0.389235_ID_7261
NODE_3931_length_1834_cov_0.634561_ID_7263
NODE_3932_length_1833_cov_0.604308_ID_7265
NODE_3933_length_1832_cov_0.439024_ID_7267
NODE_3935_length_1831_cov_0.447219_ID_7271
NODE_3937_length_1829_cov_0.66875_ID_7277
NODE_3938_length_1829_cov_0.366477_ID_7279
NODE_3940_length_1829_cov_0.565341_ID_7281
NODE_3941_length_1829_cov_0.692614_ID_7283
NODE_3943_length_1829_cov_0.367614_ID_7287
NODE_3944_length_1828_cov_0.829449_ID_7289
NODE_3945_length_1828_cov_0.588971_ID_7291
NODE_3946_length_1827_cov_0.985779_ID_7293
NODE_3948_length_1826_cov_0.531019_ID_7297
NODE_3949_length_1826_cov_0.821855_ID_7299
NODE_3950_length_1826_cov_0.922595_ID_7301
NODE_3953_length_1825_cov_0.599658_ID_7307
NODE_3954_length_1825_cov_0.53246_ID_7309
NODE_3955_length_1824_cov_0.461538_ID_7311
NODE_3958_length_1823_cov_0.40935_ID_7315
NODE_3960_length_1823_cov_0.40992_ID_7319
NODE_3962_length_1822_cov_0.385625_ID_7323
NODE_3963_length_1822_cov_0.337707_ID_7325
NODE_3964_length_1822_cov_0.448374_ID_7327
NODE_3966_length_1821_cov_0.856735_ID_7329
NODE_3968_length_1820_cov_0.3992_ID_7331
NODE_3969_length_1820_cov_0.515134_ID_7333
NODE_3970_length_1820_cov_0.696174_ID_7335
NODE_3971_length_1820_cov_0.575671_ID_7337
NODE_3972_length_1820_cov_0.665905_ID_7339
NODE_3974_length_1819_cov_0.413143_ID_7343
NODE_3975_length_1818_cov_0.591195_ID_7345
NODE_3976_length_1818_cov_1.20812_ID_7347
NODE_3977_length_1818_cov_0.369926_ID_7349
NODE_3980_length_1817_cov_0.414188_ID_7353
NODE_3983_length_1816_cov_0.586148_ID_7359
NODE_3984_length_1815_cov_1.19817_ID_7361
NODE_3987_length_1814_cov_0.517479_ID_7367
NODE_3989_length_1813_cov_0.555619_ID_7371
NODE_3990_length_1813_cov_0.442087_ID_7373
NODE_3992_length_1813_cov_0.405963_ID_7377
NODE_3993_length_1812_cov_0.620769_ID_7379
NODE_3994_length_1812_cov_0.803787_ID_7381
NODE_3995_length_1811_cov_0.532721_ID_7383
NODE_3996_length_1811_cov_0.628014_ID_7385
NODE_3997_length_1811_cov_0.685993_ID_7387
NODE_3998_length_1811_cov_0.885189_ID_7389
NODE_4002_length_1810_cov_0.554279_ID_7397
NODE_4003_length_1810_cov_0.704193_ID_7399
NODE_4005_length_1809_cov_0.56954_ID_7403
NODE_4008_length_1809_cov_0.535057_ID_7409
NODE_4010_length_1808_cov_0.379528_ID_7413
NODE_4011_length_1808_cov_0.688902_ID_7415
NODE_4012_length_1808_cov_0.507763_ID_7417
NODE_4013_length_1808_cov_0.518114_ID_7419
NODE_4014_length_1808_cov_0.723979_ID_7421
NODE_4015_length_1808_cov_0.643473_ID_7423
NODE_4017_length_1807_cov_0.541427_ID_7427
NODE_4018_length_1807_cov_0.405639_ID_7429
NODE_4019_length_1807_cov_0.659954_ID_7431
NODE_4020_length_1807_cov_0.772727_ID_7433
NODE_4022_length_1807_cov_1.40219_ID_7437
NODE_4023_length_1806_cov_0.69833_ID_7439
NODE_4025_length_1806_cov_0.683362_ID_7443
NODE_4027_length_1805_cov_0.954493_ID_7447
NODE_4029_length_1805_cov_0.495392_ID_7451
NODE_4030_length_1805_cov_0.729839_ID_7453
NODE_4031_length_1804_cov_0.245533_ID_7455
NODE_4032_length_1803_cov_0.54902_ID_7457
NODE_4033_length_1803_cov_0.765859_ID_7459
NODE_4034_length_1803_cov_0.365629_ID_7461
NODE_4035_length_1802_cov_0.542412_ID_7463
NODE_4039_length_1802_cov_0.642816_ID_7471
NODE_4040_length_1801_cov_0.530023_ID_7473
NODE_4041_length_1801_cov_1.03811_ID_7475
NODE_4043_length_1800_cov_0.683998_ID_7479
NODE_4044_length_1800_cov_0.352975_ID_7481
NODE_4046_length_1800_cov_0.616984_ID_7485
NODE_4047_length_1799_cov_0.783237_ID_7487
NODE_4049_length_1799_cov_0.395954_ID_7491
NODE_4050_length_1798_cov_0.688837_ID_7493
NODE_4051_length_1798_cov_0.831116_ID_7495
NODE_4052_length_1798_cov_0.80856_ID_7497
NODE_4053_length_1798_cov_0.780798_ID_91973
NODE_4054_length_1797_cov_1.26678_ID_7499
NODE_4055_length_1797_cov_0.340278_ID_7501
NODE_4056_length_1797_cov_0.551505_ID_7503
NODE_4057_length_1797_cov_0.922454_ID_7505
NODE_4058_length_1796_cov_0.599305_ID_7507
NODE_4059_length_1796_cov_0.636364_ID_7509
NODE_4060_length_1796_cov_0.678633_ID_7511
NODE_4061_length_1796_cov_0.611465_ID_7513
NODE_4062_length_1796_cov_0.749276_ID_7515
NODE_4064_length_1795_cov_0.483198_ID_7519
NODE_4065_length_1794_cov_0.695072_ID_7521
NODE_4066_length_1794_cov_0.589565_ID_7523
NODE_4067_length_1794_cov_0.415652_ID_7525
NODE_4068_length_1794_cov_0.656812_ID_7527
NODE_4070_length_1794_cov_0.86029_ID_7531
NODE_4071_length_1793_cov_0.486079_ID_7533
NODE_4072_length_1793_cov_0.446056_ID_7535
NODE_4077_length_1792_cov_0.443993_ID_7545
NODE_4078_length_1791_cov_0.420441_ID_7547
NODE_4079_length_1791_cov_0.550523_ID_7549
NODE_4080_length_1791_cov_0.476771_ID_7551
NODE_4082_length_1790_cov_0.484021_ID_7553
NODE_4083_length_1789_cov_0.520349_ID_7555
NODE_4084_length_1789_cov_0.540698_ID_7557
NODE_4085_length_1789_cov_0.577907_ID_7559
NODE_4086_length_1789_cov_0.564535_ID_7561
NODE_4087_length_1789_cov_0.37093_ID_7563
NODE_4088_length_1789_cov_0.634302_ID_7565
NODE_4090_length_1788_cov_0.647469_ID_7569
NODE_4091_length_1788_cov_0.378127_ID_7571
NODE_4093_length_1788_cov_0.446771_ID_7575
NODE_4095_length_1787_cov_0.576251_ID_7577
NODE_4096_length_1787_cov_0.341094_ID_7579
NODE_4097_length_1787_cov_0.378347_ID_7581
NODE_4098_length_1786_cov_0.788002_ID_7583
NODE_4099_length_1786_cov_1.07455_ID_7585
NODE_4100_length_1785_cov_0.891026_ID_7587
NODE_4103_length_1784_cov_0.680466_ID_7593
NODE_4104_length_1784_cov_0.724198_ID_7595
NODE_4105_length_1784_cov_0.468222_ID_7597
NODE_4106_length_1783_cov_0.459743_ID_7599
NODE_4107_length_1783_cov_0.718203_ID_7601
NODE_4108_length_1782_cov_0.636311_ID_7603
NODE_4110_length_1782_cov_0.692353_ID_7607
NODE_4112_length_1782_cov_1.37186_ID_7609
NODE_4113_length_1781_cov_0.780958_ID_7611
NODE_4114_length_1781_cov_0.574766_ID_7613
NODE_4115_length_1781_cov_0.723131_ID_7615
NODE_4116_length_1781_cov_1.02745_ID_7617
NODE_4117_length_1780_cov_0.458796_ID_7619
NODE_4118_length_1780_cov_0.580362_ID_7621
NODE_4119_length_1780_cov_0.376388_ID_7623
NODE_411_length_13834_cov_1.44475_ID_787
NODE_4120_length_1780_cov_0.649328_ID_7625
NODE_4121_length_1779_cov_0.671345_ID_7627
NODE_4123_length_1779_cov_0.568421_ID_7631
NODE_4124_length_1778_cov_0.912229_ID_7633
NODE_4126_length_1778_cov_0.520187_ID_7637
NODE_4127_length_1776_cov_0.53017_ID_7639
NODE_4130_length_1775_cov_0.280774_ID_7645
NODE_4131_length_1775_cov_0.934349_ID_7647
NODE_4132_length_1775_cov_0.493552_ID_7649
NODE_4133_length_1774_cov_0.486804_ID_7651
NODE_4136_length_1773_cov_0.566901_ID_7657
NODE_4139_length_1772_cov_0.381679_ID_7663
NODE_4140_length_1772_cov_0.544921_ID_7665
NODE_4142_length_1771_cov_0.782609_ID_7669
NODE_4143_length_1771_cov_0.522914_ID_7671
NODE_4144_length_1771_cov_0.675088_ID_7673
NODE_4145_length_1771_cov_0.743831_ID_7675
NODE_4146_length_1770_cov_0.56555_ID_7677
NODE_4147_length_1770_cov_0.84127_ID_41679
NODE_4149_length_1770_cov_0.895356_ID_7681
NODE_4150_length_1770_cov_0.394474_ID_7683
NODE_4151_length_1769_cov_0.437059_ID_7685
NODE_4152_length_1769_cov_0.622941_ID_7687
NODE_4154_length_1769_cov_0.422941_ID_7691
NODE_4155_length_1769_cov_0.501176_ID_7693
NODE_4157_length_1768_cov_0.81754_ID_7697
NODE_4158_length_1768_cov_0.775162_ID_7699
NODE_4160_length_1767_cov_0.320377_ID_7703
NODE_4161_length_1767_cov_0.507067_ID_7707
NODE_4163_length_1766_cov_0.451385_ID_7711
NODE_4164_length_1766_cov_0.232764_ID_7713
NODE_4165_length_1766_cov_0.539776_ID_7715
NODE_4166_length_1766_cov_0.579847_ID_7717
NODE_4167_length_1766_cov_0.606953_ID_7719
NODE_4168_length_1765_cov_0.501769_ID_7721
NODE_4170_length_1765_cov_0.432193_ID_7723
NODE_4171_length_1765_cov_0.696344_ID_7725
NODE_4173_length_1764_cov_0.583481_ID_7729
NODE_4174_length_1764_cov_0.654867_ID_7731
NODE_4175_length_1764_cov_0.767552_ID_7733
NODE_4177_length_1763_cov_0.505903_ID_7735
NODE_4178_length_1763_cov_0.544274_ID_7737
NODE_4180_length_1762_cov_0.528057_ID_7741
NODE_4183_length_1761_cov_0.573286_ID_7747
NODE_4184_length_1761_cov_0.622931_ID_7749
NODE_4185_length_1760_cov_0.638084_ID_7751
NODE_4186_length_1760_cov_0.446481_ID_7753
NODE_4187_length_1760_cov_0.710822_ID_7755
NODE_4189_length_1759_cov_0.94497_ID_91223
NODE_4190_length_1759_cov_0.670414_ID_7759
NODE_4191_length_1758_cov_0.57016_ID_7761
NODE_4192_length_1757_cov_0.492891_ID_7763
NODE_4193_length_1757_cov_0.540284_ID_7765
NODE_4196_length_1757_cov_0.475711_ID_7771
NODE_4197_length_1756_cov_1.14878_ID_7773
NODE_4198_length_1756_cov_0.53527_ID_7775
NODE_4201_length_1755_cov_0.872479_ID_7781
NODE_4203_length_1755_cov_0.45255_ID_7785
NODE_4204_length_1755_cov_0.911625_ID_7787
NODE_4205_length_1753_cov_0.496437_ID_7789
NODE_4206_length_1753_cov_0.508314_ID_7791
NODE_4207_length_1753_cov_1.3272_ID_10811
NODE_4208_length_1753_cov_0.572447_ID_7793
NODE_4209_length_1752_cov_0.556744_ID_7795
NODE_4211_length_1752_cov_0.661319_ID_7799
NODE_4213_length_1751_cov_1.25268_ID_7803
NODE_4214_length_1750_cov_0.965497_ID_7805
NODE_4216_length_1750_cov_1.11719_ID_7809
NODE_4218_length_1750_cov_0.449137_ID_7813
NODE_4220_length_1749_cov_0.472024_ID_7817
NODE_4221_length_1749_cov_0.320833_ID_7819
NODE_4222_length_1747_cov_0.438617_ID_7821
NODE_4223_length_1747_cov_0.746126_ID_7823
NODE_4225_length_1747_cov_0.341478_ID_7827
NODE_4226_length_1746_cov_0.526535_ID_7829
NODE_4227_length_1745_cov_0.584129_ID_7831
NODE_4228_length_1744_cov_0.804776_ID_7833
NODE_4229_length_1744_cov_0.973134_ID_7835
NODE_4231_length_1744_cov_0.534925_ID_7839
NODE_4232_length_1743_cov_0.384707_ID_7841
NODE_4233_length_1743_cov_0.729391_ID_7843
NODE_4234_length_1743_cov_0.459379_ID_7845
NODE_4235_length_1743_cov_0.611708_ID_7847
NODE_4236_length_1743_cov_0.71147_ID_7849
NODE_4237_length_1742_cov_0.416019_ID_7851
NODE_4243_length_1741_cov_0.386364_ID_7865
NODE_4244_length_1740_cov_0.708558_ID_7867
NODE_4245_length_1740_cov_0.944345_ID_7869
NODE_4247_length_1739_cov_0.422156_ID_7873
NODE_4248_length_1739_cov_0.767066_ID_7875
NODE_4249_length_1739_cov_0.71976_ID_7877
NODE_4250_length_1738_cov_0.298981_ID_7879
NODE_4252_length_1738_cov_0.69982_ID_7883
NODE_4254_length_1737_cov_0.57554_ID_7887
NODE_4255_length_1736_cov_0.742651_ID_7889
NODE_4257_length_1736_cov_1.03899_ID_7895
NODE_4258_length_1735_cov_0.618247_ID_7897
NODE_4259_length_1735_cov_0.32473_ID_7899
NODE_4260_length_1735_cov_0.315726_ID_7901
NODE_4261_length_1735_cov_0.733493_ID_12403
NODE_4262_length_1734_cov_0.454655_ID_7903
NODE_4263_length_1734_cov_0.452252_ID_7905
NODE_4265_length_1734_cov_0.427628_ID_7909
NODE_4266_length_1733_cov_0.67488_ID_7911
NODE_4268_length_1732_cov_0.464221_ID_7915
NODE_4269_length_1732_cov_0.547204_ID_7917
NODE_4270_length_1732_cov_0.668671_ID_7919
NODE_4272_length_1731_cov_0.5_ID_7921
NODE_4273_length_1731_cov_0.333333_ID_7923
NODE_4277_length_1731_cov_0.640193_ID_7931
NODE_4278_length_1731_cov_0.797232_ID_7933
NODE_4279_length_1729_cov_0.549398_ID_7935
NODE_4280_length_1729_cov_0.46506_ID_7937
NODE_4281_length_1728_cov_0.509343_ID_7939
NODE_4282_length_1728_cov_0.612417_ID_7941
NODE_4283_length_1727_cov_0.762364_ID_7943
NODE_4284_length_1726_cov_0.537115_ID_7945
NODE_4285_length_1726_cov_0.57936_ID_7947
NODE_4286_length_1726_cov_1.00121_ID_7949
NODE_4287_length_1726_cov_0.640314_ID_7951
NODE_4288_length_1726_cov_0.684369_ID_7953
NODE_4292_length_1725_cov_0.394324_ID_7961
NODE_4294_length_1724_cov_0.817523_ID_7965
NODE_4295_length_1724_cov_0.535347_ID_7967
NODE_4296_length_1724_cov_0.504532_ID_7969
NODE_4298_length_1723_cov_0.478839_ID_7973
NODE_4299_length_1723_cov_0.641475_ID_7975
NODE_4300_length_1723_cov_0.758767_ID_7977
NODE_4302_length_1722_cov_0.387175_ID_7981
NODE_4303_length_1722_cov_0.488808_ID_7983
NODE_4305_length_1721_cov_0.748184_ID_7987
NODE_4306_length_1721_cov_1.80266_ID_7989
NODE_4307_length_1721_cov_0.52845_ID_7991
NODE_4308_length_1721_cov_0.655569_ID_7993
NODE_4309_length_1720_cov_1.14961_ID_7995
NODE_4310_length_1720_cov_0.587523_ID_7997
NODE_4313_length_1720_cov_0.939431_ID_8003
NODE_4315_length_1719_cov_0.478182_ID_8005
NODE_4316_length_1719_cov_0.568485_ID_8007
NODE_4317_length_1719_cov_0.539394_ID_8009
NODE_4319_length_1718_cov_0.529412_ID_8013
NODE_4320_length_1718_cov_0.49909_ID_8015
NODE_4321_length_1718_cov_0.639782_ID_8017
NODE_4322_length_1718_cov_0.461492_ID_8019
NODE_4324_length_1717_cov_0.61165_ID_8021
NODE_4325_length_1717_cov_0.495752_ID_8023
NODE_4327_length_1716_cov_0.579842_ID_8027
NODE_4328_length_1716_cov_0.367335_ID_8029
NODE_4330_length_1715_cov_0.500608_ID_8031
NODE_4331_length_1715_cov_0.53706_ID_8033
NODE_4334_length_1715_cov_0.738761_ID_8039
NODE_4335_length_1715_cov_0.576549_ID_8041
NODE_4336_length_1714_cov_0.29848_ID_8043
NODE_4338_length_1713_cov_0.347324_ID_8045
NODE_4341_length_1713_cov_0.559611_ID_8051
NODE_4343_length_1713_cov_0.40146_ID_8055
NODE_4344_length_1712_cov_0.387097_ID_8057
NODE_4345_length_1712_cov_0.612903_ID_8059
NODE_4346_length_1712_cov_0.492392_ID_8061
NODE_4347_length_1712_cov_0.811929_ID_8063
NODE_4348_length_1711_cov_0.471376_ID_8065
NODE_4349_length_1711_cov_0.831912_ID_8067
NODE_4351_length_1710_cov_0.274223_ID_8071
NODE_4353_length_1709_cov_0.889024_ID_8075
NODE_4354_length_1709_cov_0.517073_ID_8077
NODE_4355_length_1709_cov_0.533537_ID_8079
NODE_4356_length_1709_cov_0.561585_ID_8081
NODE_4357_length_1709_cov_0.45061_ID_46261
NODE_4358_length_1708_cov_0.384381_ID_8083
NODE_4359_length_1708_cov_0.730933_ID_8085
NODE_4360_length_1708_cov_1.1867_ID_8087
NODE_4361_length_1708_cov_0.71263_ID_8089
NODE_4362_length_1707_cov_0.543346_ID_8091
NODE_4363_length_1706_cov_0.350641_ID_8093
NODE_4364_length_1706_cov_0.586439_ID_8095
NODE_4366_length_1705_cov_0.389364_ID_8097
NODE_4368_length_1705_cov_0.537897_ID_8099
NODE_4369_length_1705_cov_0.595966_ID_8101
NODE_4370_length_1705_cov_0.468826_ID_8103
NODE_4371_length_1704_cov_0.586544_ID_8105
NODE_4372_length_1704_cov_0.829358_ID_8107
NODE_4373_length_1704_cov_0.963914_ID_8109
NODE_4374_length_1703_cov_0.735618_ID_8113
NODE_4376_length_1702_cov_0.600735_ID_8117
NODE_4378_length_1702_cov_0.652786_ID_8121
NODE_4383_length_1701_cov_0.541667_ID_8129
NODE_4384_length_1701_cov_0.337623_ID_8131
NODE_4385_length_1701_cov_0.727328_ID_8133
NODE_4386_length_1700_cov_0.684856_ID_8135
NODE_4387_length_1700_cov_0.519926_ID_8137
NODE_4390_length_1700_cov_0.619865_ID_8143
NODE_4391_length_1700_cov_0.638259_ID_8145
NODE_4392_length_1700_cov_0.515021_ID_8147
NODE_4395_length_1699_cov_0.496319_ID_8153
NODE_4396_length_1699_cov_0.528834_ID_8155
NODE_4397_length_1697_cov_0.495086_ID_8159
NODE_4398_length_1696_cov_0.762139_ID_8161
NODE_4399_length_1696_cov_0.881991_ID_8163
NODE_4400_length_1696_cov_0.494161_ID_8165
NODE_4403_length_1695_cov_0.555351_ID_8171
NODE_4404_length_1694_cov_0.691692_ID_8173
NODE_4405_length_1694_cov_0.723692_ID_8175
NODE_4407_length_1693_cov_0.336823_ID_8179
NODE_4408_length_1693_cov_0.512315_ID_8181
NODE_4411_length_1692_cov_0.32594_ID_8187
NODE_4412_length_1692_cov_0.536661_ID_8189
NODE_4413_length_1692_cov_0.597043_ID_8191
NODE_4414_length_1691_cov_0.597411_ID_8193
NODE_4415_length_1691_cov_0.910604_ID_8195
NODE_4416_length_1691_cov_1.59494_ID_8197
NODE_4417_length_1691_cov_0.709001_ID_8199
NODE_4418_length_1690_cov_0.791487_ID_8201
NODE_4419_length_1690_cov_0.505244_ID_8203
NODE_4421_length_1690_cov_0.351018_ID_8207
NODE_4422_length_1690_cov_0.402221_ID_8209
NODE_4423_length_1689_cov_0.818519_ID_8211
NODE_4424_length_1688_cov_0.26189_ID_8213
NODE_4425_length_1688_cov_0.494132_ID_8215
NODE_4426_length_1688_cov_0.509574_ID_8217
NODE_4427_length_1687_cov_0.539555_ID_8219
NODE_4429_length_1686_cov_0.661101_ID_8223
NODE_4430_length_1686_cov_0.454545_ID_8225
NODE_4431_length_1685_cov_0.814356_ID_8227
NODE_4432_length_1685_cov_0.631807_ID_8229
NODE_4433_length_1685_cov_0.647277_ID_8231
NODE_4434_length_1684_cov_0.517647_ID_8233
NODE_4438_length_1683_cov_0.884758_ID_8241
NODE_4439_length_1683_cov_0.727385_ID_8243
NODE_4440_length_1683_cov_0.47026_ID_8245
NODE_4441_length_1683_cov_0.600991_ID_8247
NODE_4443_length_1683_cov_0.871128_ID_8251
NODE_4445_length_1682_cov_0.50527_ID_8255
NODE_4447_length_1681_cov_0.704715_ID_8259
NODE_4449_length_1680_cov_0.778399_ID_8263
NODE_4450_length_1680_cov_0.54252_ID_8265
NODE_4451_length_1680_cov_0.502173_ID_8267
NODE_4452_length_1680_cov_0.409683_ID_8269
NODE_4457_length_1677_cov_0.636816_ID_8279
NODE_4458_length_1677_cov_0.472637_ID_8281
NODE_4460_length_1677_cov_0.421642_ID_8285
NODE_4461_length_1676_cov_0.368388_ID_8287
NODE_4462_length_1676_cov_0.55196_ID_8289
NODE_4463_length_1675_cov_0.783935_ID_8291
NODE_4464_length_1675_cov_0.578456_ID_8293
NODE_4466_length_1675_cov_0.454545_ID_8295
NODE_4467_length_1675_cov_0.539851_ID_8297
NODE_4468_length_1675_cov_0.419054_ID_8299
NODE_4469_length_1675_cov_0.630137_ID_8301
NODE_4470_length_1673_cov_0.569202_ID_8303
NODE_4471_length_1673_cov_0.335411_ID_8305
NODE_4474_length_1672_cov_0.688085_ID_8311
NODE_4475_length_1672_cov_0.569557_ID_8313
NODE_4477_length_1672_cov_0.700561_ID_8317
NODE_4479_length_1671_cov_0.353933_ID_8319
NODE_447_length_12739_cov_1.11586_ID_847
NODE_4480_length_1671_cov_0.742821_ID_8321
NODE_4481_length_1671_cov_0.574906_ID_8323
NODE_4482_length_1671_cov_0.524969_ID_8325
NODE_4483_length_1671_cov_0.58427_ID_8327
NODE_4484_length_1670_cov_0.892567_ID_8329
NODE_4485_length_1670_cov_0.429731_ID_8331
NODE_4486_length_1670_cov_0.209869_ID_8333
NODE_4487_length_1670_cov_0.604622_ID_8335
NODE_4488_length_1669_cov_0.5475_ID_8337
NODE_4489_length_1669_cov_0.995625_ID_8339
NODE_4490_length_1669_cov_0.88375_ID_8341
NODE_4491_length_1669_cov_0.644375_ID_8343
NODE_4492_length_1668_cov_0.809256_ID_8345
NODE_4493_length_1668_cov_0.529706_ID_8347
NODE_4494_length_1668_cov_0.816135_ID_8349
NODE_4495_length_1668_cov_0.894309_ID_8351
NODE_4496_length_1668_cov_0.512195_ID_8353
NODE_4497_length_1667_cov_0.40363_ID_8355
NODE_4498_length_1666_cov_0.554164_ID_8357
NODE_4499_length_1666_cov_0.398873_ID_8359
NODE_4501_length_1665_cov_0.342105_ID_8363
NODE_4502_length_1664_cov_0.220063_ID_8365
NODE_4505_length_1663_cov_0.624843_ID_8371
NODE_4506_length_1663_cov_0.3601_ID_8373
NODE_4507_length_1663_cov_0.392723_ID_8375
NODE_4509_length_1662_cov_0.593848_ID_8379
NODE_4510_length_1662_cov_0.678594_ID_8381
NODE_4511_length_1662_cov_0.670433_ID_8383
NODE_4512_length_1661_cov_0.528894_ID_8385
NODE_4513_length_1661_cov_0.644472_ID_8387
NODE_4514_length_1661_cov_0.412688_ID_8389
NODE_4515_length_1661_cov_0.486809_ID_8391
NODE_4517_length_1661_cov_0.351131_ID_8395
NODE_4518_length_1661_cov_1.28392_ID_8397
NODE_4519_length_1660_cov_0.730987_ID_8399
NODE_4520_length_1660_cov_0.516656_ID_8401
NODE_4523_length_1659_cov_0.589308_ID_8407
NODE_4525_length_1659_cov_0.628302_ID_8411
NODE_4526_length_1659_cov_0.646541_ID_8413
NODE_4530_length_1658_cov_1.58968_ID_8423
NODE_4531_length_1658_cov_0.649465_ID_8425
NODE_4532_length_1658_cov_0.535557_ID_8427
NODE_4533_length_1658_cov_0.717432_ID_8429
NODE_4534_length_1657_cov_0.524559_ID_8431
NODE_4535_length_1657_cov_1.30479_ID_8433
NODE_4536_length_1657_cov_0.487406_ID_8435
NODE_4538_length_1657_cov_0.469144_ID_8439
NODE_4541_length_1657_cov_0.549118_ID_8445
NODE_4542_length_1657_cov_0.850756_ID_8447
NODE_4543_length_1656_cov_0.73598_ID_8449
NODE_4544_length_1656_cov_0.347826_ID_8451
NODE_4545_length_1656_cov_0.706364_ID_8453
NODE_4546_length_1655_cov_0.449559_ID_13289
NODE_4547_length_1655_cov_0.381463_ID_24007
NODE_4550_length_1654_cov_0.476972_ID_8457
NODE_4551_length_1654_cov_0.320505_ID_8459
NODE_4552_length_1653_cov_0.549242_ID_8461
NODE_4553_length_1653_cov_0.608586_ID_8463
NODE_4554_length_1653_cov_0.873737_ID_8465
NODE_4555_length_1652_cov_0.46494_ID_8467
NODE_4556_length_1652_cov_0.705622_ID_8469
NODE_4557_length_1652_cov_0.592546_ID_8471
NODE_4561_length_1651_cov_0.438685_ID_8479
NODE_4562_length_1651_cov_0.470923_ID_8481
NODE_4563_length_1651_cov_0.40708_ID_8483
NODE_4564_length_1650_cov_0.439595_ID_8485
NODE_4565_length_1650_cov_0.412397_ID_8487
NODE_4566_length_1650_cov_0.847565_ID_8489
NODE_4567_length_1649_cov_0.562025_ID_8491
NODE_4568_length_1649_cov_0.76519_ID_8493
NODE_4569_length_1649_cov_0.320253_ID_8495
NODE_4570_length_1649_cov_0.418987_ID_8497
NODE_4571_length_1649_cov_0.506962_ID_8499
NODE_4575_length_1647_cov_0.753485_ID_8507
NODE_4576_length_1647_cov_0.362484_ID_8509
NODE_4577_length_1647_cov_0.506971_ID_8511
NODE_4578_length_1647_cov_0.659062_ID_8513
NODE_4579_length_1646_cov_0.532657_ID_8515
[truncated: 3,810 more rows]

## Sheet: Group4
NODE_1085_length_5125_cov_7.41614_ID_2079
NODE_10_length_197280_cov_6.08854_ID_36495
NODE_110_length_55785_cov_7.09486_ID_273
NODE_116_length_53561_cov_5.75705_ID_279
NODE_119_length_52318_cov_7.76723_ID_231
NODE_11_length_184036_cov_5.45673_ID_15347
NODE_128_length_48620_cov_6.68701_ID_249
NODE_135_length_44199_cov_5.92178_ID_277
NODE_13_length_175398_cov_6.69494_ID_25
NODE_146_length_40993_cov_5.84332_ID_14451
NODE_14_length_170616_cov_7.09132_ID_10771
NODE_1546_length_3696_cov_4.89937_ID_4739
NODE_1600_length_3592_cov_6.98836_ID_91269
NODE_16_length_161132_cov_6.48335_ID_31
NODE_17_length_158093_cov_6.82135_ID_183
NODE_198_length_29115_cov_6.76902_ID_441
NODE_19_length_151434_cov_6.2597_ID_26935
NODE_2043_length_2978_cov_7.18838_ID_91733
NODE_2179_length_2829_cov_6.90036_ID_4055
NODE_2330_length_2672_cov_5.63158_ID_91825
NODE_2352_length_2657_cov_6.95015_ID_91607
NODE_2411_length_2610_cov_5.87721_ID_91245
NODE_295_length_19234_cov_5.86486_ID_651
NODE_301_length_18853_cov_6.20049_ID_829
NODE_31_length_119912_cov_6.44601_ID_57
NODE_3288_length_2073_cov_6.19012_ID_6051
NODE_333_length_17348_cov_7.03108_ID_27
NODE_353_length_16269_cov_7.61691_ID_949
NODE_355_length_16215_cov_5.17075_ID_731
NODE_369_length_15830_cov_7.23203_ID_825
NODE_397_length_14657_cov_5.40143_ID_753
NODE_39_length_104739_cov_6.61372_ID_75
NODE_3_length_453062_cov_6.14442_ID_25613
NODE_42_length_99492_cov_7.0558_ID_87
NODE_4875_length_1574_cov_6.04252_ID_92225
NODE_493_length_11485_cov_9.7698_ID_1463
NODE_502_length_11269_cov_7.02143_ID_943
NODE_507_length_11052_cov_8.61732_ID_951
NODE_514_length_10889_cov_6.15665_ID_1423
NODE_5547_length_1441_cov_5.70773_ID_23925
NODE_5725_length_1412_cov_6.16381_ID_92117
NODE_64_length_83930_cov_4.62449_ID_121
NODE_663_length_8460_cov_8.52723_ID_1533
NODE_68_length_81426_cov_7.41242_ID_137
NODE_69_length_81038_cov_6.57121_ID_135
NODE_6_length_292222_cov_6.47613_ID_35
NODE_701_length_8034_cov_8.01984_ID_1507
NODE_70_length_80872_cov_6.26466_ID_157
NODE_72_length_77943_cov_6.83894_ID_185
NODE_87_length_68967_cov_5.74086_ID_199
NODE_8857_length_1030_cov_5.91051_ID_9057
NODE_95_length_64628_cov_7.76405_ID_189
NODE_99_length_61935_cov_7.56551_ID_3023

## Sheet: Group5
NODE_1000_length_5597_cov_1.22992_ID_1913
NODE_1002_length_5576_cov_1.81696_ID_1917
NODE_1003_length_5569_cov_0.909091_ID_1919
NODE_1004_length_5569_cov_1.67073_ID_1921
NODE_1005_length_5564_cov_1.48426_ID_1923
NODE_1006_length_5556_cov_1.93403_ID_1925
NODE_1008_length_5543_cov_1.37048_ID_1929
NODE_1009_length_5532_cov_1.88413_ID_1931
NODE_1013_length_5516_cov_2.52836_ID_1939
NODE_1014_length_5515_cov_1.18472_ID_1941
NODE_1015_length_5505_cov_1.5206_ID_1943
NODE_1016_length_5502_cov_1.45868_ID_1945
NODE_1019_length_5480_cov_2.10756_ID_1951
NODE_1022_length_5466_cov_1.66833_ID_1955
NODE_1025_length_5454_cov_1.06945_ID_1961
NODE_1027_length_5444_cov_1.83349_ID_1967
NODE_1028_length_5444_cov_1.1133_ID_1969
NODE_1030_length_5441_cov_1.09587_ID_1973
NODE_1031_length_5437_cov_1.66859_ID_1975
NODE_1032_length_5437_cov_0.972615_ID_1977
NODE_1033_length_5436_cov_1.4496_ID_1979
NODE_1036_length_5420_cov_2.00841_ID_1987
NODE_1037_length_5418_cov_2.48439_ID_1989
NODE_1038_length_5409_cov_2.0882_ID_1991
NODE_1041_length_5389_cov_1.20789_ID_1993
NODE_1043_length_5364_cov_1.34561_ID_1997
NODE_1047_length_5327_cov_1.88684_ID_2005
NODE_1048_length_5326_cov_1.17044_ID_2007
NODE_1055_length_5293_cov_2.87347_ID_2021
NODE_1060_length_5266_cov_1.35636_ID_2029
NODE_1062_length_5261_cov_1.51888_ID_2033
NODE_1068_length_5232_cov_2.1687_ID_2043
NODE_1074_length_5192_cov_0.914308_ID_2055
NODE_1076_length_5188_cov_1.40848_ID_2059
NODE_1078_length_5168_cov_1.3891_ID_2063
NODE_1079_length_5164_cov_1.41001_ID_2065
NODE_1082_length_5142_cov_1.39326_ID_2071
NODE_1084_length_5135_cov_1.64587_ID_2075
NODE_1089_length_5117_cov_2.80943_ID_2087
NODE_1091_length_5098_cov_1.83476_ID_2091
NODE_1094_length_5070_cov_2.26915_ID_2099
NODE_1096_length_5058_cov_2.20164_ID_2101
NODE_1098_length_5053_cov_1.0927_ID_2103
NODE_1101_length_5049_cov_1.60321_ID_2107
NODE_1103_length_5047_cov_0.807352_ID_2111
NODE_1111_length_4996_cov_1.01563_ID_2129
NODE_1112_length_4995_cov_1.3313_ID_2131
NODE_1113_length_4994_cov_2.52792_ID_2165
NODE_1114_length_4992_cov_1.11497_ID_2133
NODE_1116_length_4991_cov_1.23893_ID_2137
NODE_1121_length_4977_cov_2.08924_ID_2145
NODE_1125_length_4959_cov_1.44172_ID_2153
NODE_1126_length_4957_cov_2.13543_ID_2155
NODE_1128_length_4954_cov_1.78055_ID_2159
NODE_1129_length_4949_cov_1.93627_ID_2161
NODE_1131_length_4934_cov_1.83042_ID_2167
NODE_1133_length_4932_cov_1.92371_ID_2169
NODE_1134_length_4918_cov_2.19117_ID_2173
NODE_1136_length_4908_cov_1.78653_ID_2177
NODE_1138_length_4899_cov_1.3824_ID_2183
NODE_1139_length_4898_cov_1.32905_ID_2185
NODE_1144_length_4866_cov_1.23952_ID_5071
NODE_1145_length_4864_cov_1.92158_ID_2195
NODE_1148_length_4860_cov_1.37111_ID_2201
NODE_1153_length_4839_cov_1.63774_ID_2211
NODE_1154_length_4839_cov_1.187_ID_2213
NODE_1158_length_4825_cov_1.66884_ID_2223
NODE_1159_length_4824_cov_1.97666_ID_2225
NODE_1160_length_4822_cov_1.60299_ID_2227
NODE_1164_length_4804_cov_1.26336_ID_2235
NODE_1166_length_4800_cov_1.82456_ID_2239
NODE_1169_length_4796_cov_1.73768_ID_2245
NODE_1170_length_4795_cov_1.40605_ID_2247
NODE_1173_length_4773_cov_1.78529_ID_2255
NODE_1177_length_4749_cov_1.54103_ID_2263
NODE_1178_length_4746_cov_1.0526_ID_2803
NODE_1180_length_4742_cov_1.31757_ID_2269
NODE_1182_length_4737_cov_1.22365_ID_2271
NODE_1190_length_4697_cov_1.48747_ID_2285
NODE_1191_length_4691_cov_1.07486_ID_2289
NODE_1192_length_4684_cov_1.64789_ID_2293
NODE_1194_length_4674_cov_2.0165_ID_2299
NODE_1196_length_4669_cov_2.01761_ID_2301
NODE_1198_length_4659_cov_1.20741_ID_2305
NODE_1199_length_4657_cov_1.7888_ID_2307
NODE_1200_length_4652_cov_3.02575_ID_2697
NODE_1204_length_4645_cov_1.16106_ID_2315
NODE_1205_length_4644_cov_1.17464_ID_2317
NODE_1209_length_4630_cov_2.34115_ID_2321
NODE_1212_length_4623_cov_1.63395_ID_2325
NODE_1214_length_4617_cov_1.56618_ID_2329
NODE_1215_length_4601_cov_1.15071_ID_2331
NODE_1216_length_4599_cov_1.0702_ID_2335
NODE_1220_length_4574_cov_1.37647_ID_2347
NODE_1222_length_4573_cov_2.17074_ID_2351
NODE_1224_length_4567_cov_1.3108_ID_2353
NODE_1230_length_4557_cov_1.69095_ID_2365
NODE_1232_length_4555_cov_2.30651_ID_2369
NODE_1233_length_4550_cov_1.50391_ID_2373
NODE_1237_length_4532_cov_2.18015_ID_2377
NODE_1238_length_4530_cov_1.02242_ID_2379
NODE_1240_length_4527_cov_1.88627_ID_2383
NODE_1245_length_4520_cov_1.30892_ID_2389
NODE_1246_length_4518_cov_1.1915_ID_2391
NODE_1252_length_4486_cov_1.41861_ID_2401
NODE_1256_length_4472_cov_1.76084_ID_2407
NODE_1264_length_4440_cov_1.7385_ID_2429
NODE_1266_length_4435_cov_1.5071_ID_2435
NODE_1267_length_4430_cov_1.3662_ID_2437
NODE_1277_length_4402_cov_1.93676_ID_2451
NODE_1280_length_4391_cov_0.895187_ID_2457
NODE_1283_length_4390_cov_1.75145_ID_2463
NODE_1289_length_4372_cov_0.825238_ID_2479
NODE_1293_length_4360_cov_1.3745_ID_2491
NODE_1295_length_4355_cov_1.25245_ID_2493
NODE_1299_length_4337_cov_1.97493_ID_2499
NODE_1300_length_4332_cov_1.43936_ID_2501
NODE_1308_length_4315_cov_1.35163_ID_2519
NODE_1309_length_4310_cov_0.989154_ID_2521
NODE_1310_length_4308_cov_2.13494_ID_2523
NODE_1312_length_4298_cov_2.02388_ID_2529
NODE_1317_length_4277_cov_1.70295_ID_2537
NODE_1324_length_4264_cov_1.25721_ID_2549
NODE_1327_length_4259_cov_2.56181_ID_2555
NODE_1329_length_4258_cov_1.51826_ID_2559
NODE_1330_length_4252_cov_2.18264_ID_2561
NODE_1331_length_4250_cov_1.21837_ID_2563
NODE_1332_length_4249_cov_1.52105_ID_2565
NODE_1335_length_4241_cov_2.25384_ID_2571
NODE_1342_length_4222_cov_1.95305_ID_2579
NODE_1343_length_4218_cov_2.67221_ID_2581
NODE_1345_length_4217_cov_1.33269_ID_2585
NODE_1346_length_4216_cov_1.60236_ID_2587
NODE_1347_length_4215_cov_2.62856_ID_2589
NODE_1348_length_4214_cov_0.857177_ID_2591
NODE_1355_length_4189_cov_0.832524_ID_2601
NODE_1359_length_4182_cov_1.67615_ID_2609
NODE_1360_length_4182_cov_1.78799_ID_2611
NODE_1362_length_4180_cov_1.48504_ID_2615
NODE_1363_length_4178_cov_0.948893_ID_2617
NODE_1364_length_4177_cov_1.41626_ID_2619
NODE_1365_length_4173_cov_1.04459_ID_2621
NODE_1366_length_4168_cov_1.11881_ID_2623
NODE_1367_length_4162_cov_1.57342_ID_2625
NODE_1371_length_4151_cov_0.933366_ID_2635
NODE_1372_length_4140_cov_1.47973_ID_2637
NODE_1375_length_4132_cov_2.1046_ID_2641
NODE_1379_length_4117_cov_1.28039_ID_2649
NODE_1381_length_4113_cov_0.938427_ID_2653
NODE_1384_length_4101_cov_1.6684_ID_2659
NODE_1386_length_4090_cov_2.18304_ID_2663
NODE_1387_length_4090_cov_1.28003_ID_2665
NODE_1388_length_4087_cov_1.8442_ID_2669
NODE_1389_length_4087_cov_1.39547_ID_2671
NODE_1394_length_4080_cov_1.60035_ID_2681
NODE_1395_length_4079_cov_1.30125_ID_2683
NODE_1396_length_4078_cov_1.45597_ID_2685
NODE_1400_length_4059_cov_0.791729_ID_2693
NODE_1401_length_4058_cov_1.82151_ID_2695
NODE_1402_length_4055_cov_1.63497_ID_2699
NODE_1406_length_4039_cov_1.32494_ID_2707
NODE_1411_length_4030_cov_2.07953_ID_2717
NODE_1412_length_4030_cov_2.1227_ID_2719
NODE_1415_length_4026_cov_2.68082_ID_2725
NODE_1416_length_4020_cov_2.01443_ID_2729
NODE_1419_length_4014_cov_1.76375_ID_2735
NODE_1430_length_3975_cov_1.52381_ID_2761
NODE_1435_length_3968_cov_1.97666_ID_2773
NODE_1436_length_3967_cov_0.926886_ID_2775
NODE_1438_length_3960_cov_0.893087_ID_2779
NODE_1440_length_3956_cov_1.37613_ID_2783
NODE_1444_length_3950_cov_1.76114_ID_2791
NODE_1446_length_3948_cov_2.02604_ID_2795
NODE_1454_length_3921_cov_1.78037_ID_2811
NODE_1458_length_3904_cov_1.28814_ID_2817
NODE_1461_length_3893_cov_2.37735_ID_2821
NODE_1462_length_3892_cov_2.73869_ID_2823
NODE_1469_length_3866_cov_0.956018_ID_2837
NODE_1472_length_3862_cov_1.62194_ID_2843
NODE_1473_length_3862_cov_2.25732_ID_2845
NODE_1482_length_3840_cov_1.69425_ID_2863
NODE_1483_length_3839_cov_1.46313_ID_2865
NODE_1484_length_3836_cov_1.40908_ID_2867
NODE_1485_length_3830_cov_1.37038_ID_2869
NODE_1486_length_3829_cov_1.4641_ID_2871
NODE_1489_length_3817_cov_2.14248_ID_2879
NODE_1491_length_3815_cov_1.79285_ID_2883
NODE_1497_length_3804_cov_1.64953_ID_2893
NODE_1513_length_3765_cov_0.960498_ID_2923
NODE_1514_length_3763_cov_1.03817_ID_2925
NODE_1516_length_3760_cov_1.49607_ID_2929
NODE_1517_length_3759_cov_1.5626_ID_2931
NODE_1518_length_3756_cov_1.01383_ID_2933
NODE_1521_length_3749_cov_2.01821_ID_22185
NODE_1522_length_3747_cov_1.50136_ID_2939
NODE_1523_length_3745_cov_1.50408_ID_2941
NODE_1528_length_3736_cov_1.54241_ID_2945
NODE_1529_length_3733_cov_0.987991_ID_2947
NODE_1538_length_3709_cov_0.874451_ID_2963
NODE_1540_length_3706_cov_1.51938_ID_2967
NODE_1550_length_3686_cov_1.66187_ID_2983
NODE_1552_length_3681_cov_1.13621_ID_2987
NODE_1556_length_3676_cov_2.26088_ID_2995
NODE_1561_length_3663_cov_2.59794_ID_2999
NODE_1567_length_3655_cov_1.1768_ID_3005
NODE_1570_length_3644_cov_1.59413_ID_3011
NODE_1572_length_3638_cov_1.69179_ID_3015
NODE_1574_length_3637_cov_1.51485_ID_3017
NODE_1575_length_3635_cov_1.81155_ID_3019
NODE_1581_length_3626_cov_2.41018_ID_3031
NODE_1585_length_3618_cov_0.786137_ID_3039
NODE_1594_length_3603_cov_0.98953_ID_3051
NODE_1604_length_3589_cov_1.04545_ID_3067
NODE_1605_length_3588_cov_1.12475_ID_3069
NODE_1612_length_3577_cov_1.06385_ID_3081
NODE_1615_length_3568_cov_0.979137_ID_3085
NODE_1617_length_3562_cov_1.65102_ID_3089
NODE_1618_length_3562_cov_2.49699_ID_3091
NODE_1622_length_3558_cov_1.84981_ID_3095
NODE_1624_length_3557_cov_0.867833_ID_3097
NODE_1627_length_3552_cov_1.33419_ID_3103
NODE_1628_length_3551_cov_1.55485_ID_3105
NODE_1632_length_3548_cov_1.03162_ID_3113
NODE_1634_length_3545_cov_1.55524_ID_3117
NODE_1640_length_3539_cov_1.46916_ID_3127
NODE_1641_length_3538_cov_2.1597_ID_3129
NODE_1643_length_3534_cov_2.09582_ID_3133
NODE_1655_length_3516_cov_0.97389_ID_3151
NODE_1660_length_3507_cov_1.53112_ID_3159
NODE_1662_length_3503_cov_1.64706_ID_3163
NODE_1665_length_3492_cov_1.54455_ID_3169
NODE_1668_length_3490_cov_1.1216_ID_3175
NODE_1669_length_3489_cov_1.44327_ID_3177
NODE_1671_length_3484_cov_1.4735_ID_3181
NODE_1672_length_3483_cov_1.53456_ID_3183
NODE_1673_length_3483_cov_1.35882_ID_3185
NODE_1677_length_3476_cov_0.968888_ID_3193
NODE_1680_length_3464_cov_2.78675_ID_3197
NODE_1686_length_3461_cov_1.03243_ID_3203
NODE_1688_length_3458_cov_1.09708_ID_3207
NODE_1695_length_3447_cov_0.994671_ID_3219
NODE_1696_length_3447_cov_1.9325_ID_3221
NODE_1704_length_3429_cov_1.15476_ID_3235
NODE_1717_length_3415_cov_1.79797_ID_3251
NODE_1718_length_3413_cov_1.94109_ID_3253
NODE_1727_length_3400_cov_2.05434_ID_3267
NODE_1728_length_3399_cov_2.22432_ID_3269
NODE_1732_length_3393_cov_1.72112_ID_3277
NODE_1738_length_3386_cov_1.98915_ID_3291
NODE_1742_length_3384_cov_1.25551_ID_3297
NODE_1744_length_3380_cov_0.873452_ID_3301
NODE_1746_length_3376_cov_1.28152_ID_3303
NODE_1759_length_3358_cov_2.41289_ID_3325
NODE_1760_length_3356_cov_0.999696_ID_3327
NODE_1761_length_3356_cov_0.939458_ID_3329
NODE_1769_length_3342_cov_1.2487_ID_3339
NODE_1771_length_3341_cov_0.947127_ID_3343
NODE_1772_length_3341_cov_1.62133_ID_3345
NODE_1776_length_3339_cov_1.19021_ID_3353
NODE_1779_length_3334_cov_1.11179_ID_3357
NODE_1781_length_3329_cov_1.39202_ID_3361
NODE_1782_length_3328_cov_1.49678_ID_3363
NODE_1783_length_3328_cov_2.99141_ID_3365
NODE_1785_length_3326_cov_2.26466_ID_3369
NODE_1787_length_3324_cov_0.854378_ID_3373
NODE_1789_length_3323_cov_1.80701_ID_3377
NODE_1794_length_3320_cov_1.88957_ID_3385
NODE_1803_length_3310_cov_2.62265_ID_3401
NODE_1806_length_3306_cov_1.06426_ID_3405
NODE_1808_length_3302_cov_2.53078_ID_3409
NODE_1817_length_3290_cov_1.01056_ID_3423
NODE_1819_length_3288_cov_1.72414_ID_3427
NODE_1823_length_3283_cov_1.93373_ID_3437
NODE_1827_length_3279_cov_1.66386_ID_3443
NODE_1829_length_3274_cov_1.79688_ID_3445
NODE_1831_length_3272_cov_1.51983_ID_3451
NODE_1837_length_3261_cov_1.43327_ID_3459
NODE_1840_length_3256_cov_1.68779_ID_3463
NODE_1841_length_3254_cov_1.48823_ID_3465
NODE_1845_length_3242_cov_1.3492_ID_3471
NODE_1863_length_3224_cov_1.60412_ID_3505
NODE_1871_length_3208_cov_1.48646_ID_3517
NODE_1872_length_3208_cov_2.64001_ID_3519
NODE_1879_length_3197_cov_1.21579_ID_3527
NODE_1882_length_3193_cov_1.18342_ID_3533
NODE_1883_length_3193_cov_1.129_ID_3535
NODE_1885_length_3188_cov_1.77942_ID_3539
NODE_1886_length_3186_cov_0.952198_ID_3543
NODE_1888_length_3183_cov_1.25723_ID_3547
NODE_1895_length_3175_cov_0.975531_ID_3559
NODE_1896_length_3175_cov_1.25853_ID_3561
NODE_1904_length_3164_cov_1.78158_ID_3573
NODE_1905_length_3160_cov_1.70754_ID_3575
NODE_1916_length_3149_cov_0.965909_ID_3597
NODE_1918_length_3146_cov_1.27332_ID_3601
NODE_1921_length_3142_cov_1.12463_ID_3605
NODE_1923_length_3140_cov_1.7141_ID_3609
NODE_1924_length_3137_cov_2.55737_ID_3611
NODE_1931_length_3126_cov_1.45568_ID_3625
NODE_1936_length_3120_cov_2.03999_ID_3635
NODE_1943_length_3107_cov_1.00033_ID_3647
NODE_1946_length_3105_cov_1.00033_ID_3653
NODE_1947_length_3105_cov_1.0975_ID_3655
NODE_1948_length_3105_cov_1.77931_ID_3657
NODE_1959_length_3092_cov_0.479325_ID_3675
NODE_1960_length_3091_cov_1.24024_ID_3677
NODE_1961_length_3090_cov_1.63886_ID_3679
NODE_1964_length_3086_cov_0.92476_ID_3685
NODE_1965_length_3082_cov_1.18287_ID_3687
NODE_1968_length_3079_cov_1.98738_ID_3691
NODE_1973_length_3074_cov_1.47754_ID_3699
NODE_1979_length_3065_cov_1.78204_ID_3711
NODE_1981_length_3062_cov_0.979619_ID_3715
NODE_1987_length_3055_cov_0.728064_ID_3723
NODE_1989_length_3053_cov_0.990282_ID_3727
NODE_2004_length_3029_cov_1.80169_ID_3747
NODE_2006_length_3026_cov_1.32905_ID_3751
NODE_2008_length_3024_cov_1.71235_ID_3755
NODE_2010_length_3022_cov_1.46292_ID_3759
NODE_2017_length_3012_cov_0.865443_ID_3771
NODE_2030_length_2991_cov_0.730664_ID_3789
NODE_2032_length_2988_cov_1.55807_ID_3791
NODE_2037_length_2981_cov_1.11916_ID_3801
NODE_2040_length_2980_cov_1.33116_ID_3807
NODE_2049_length_2969_cov_1.26103_ID_3817
NODE_2057_length_2957_cov_1.71191_ID_3833
NODE_2066_length_2947_cov_2.48714_ID_3847
NODE_2067_length_2947_cov_1.60111_ID_3849
NODE_2078_length_2932_cov_1.47258_ID_3877
NODE_2082_length_2925_cov_1.17472_ID_3883
NODE_2083_length_2925_cov_1.27486_ID_3885
NODE_2084_length_2922_cov_1.02278_ID_3887
NODE_2088_length_2921_cov_1.45547_ID_3893
NODE_2089_length_2920_cov_1.01578_ID_3895
NODE_2093_length_2916_cov_1.85564_ID_3905
NODE_2095_length_2911_cov_2.50844_ID_3909
NODE_2100_length_2908_cov_1.37161_ID_3919
NODE_2101_length_2906_cov_1.82446_ID_3921
NODE_2102_length_2905_cov_1.42595_ID_3923
NODE_2103_length_2904_cov_1.25644_ID_3925
NODE_2109_length_2896_cov_0.773612_ID_3933
NODE_2117_length_2890_cov_1.1854_ID_3945
NODE_2119_length_2887_cov_1.11604_ID_3949
NODE_2126_length_2879_cov_0.90605_ID_3961
NODE_2128_length_2879_cov_1.12811_ID_3965
NODE_2135_length_2872_cov_0.93614_ID_3977
NODE_2136_length_2870_cov_1.23563_ID_3979
NODE_2137_length_2870_cov_1.6055_ID_3981
NODE_2138_length_2870_cov_2.66619_ID_3983
NODE_2143_length_2867_cov_1.81308_ID_3989
NODE_2144_length_2867_cov_2.00715_ID_3991
NODE_2145_length_2866_cov_1.29281_ID_3993
NODE_2152_length_2853_cov_1.58082_ID_4007
NODE_2153_length_2853_cov_1.37141_ID_4009
NODE_2155_length_2851_cov_1.60855_ID_4011
NODE_2162_length_2845_cov_0.754323_ID_4023
NODE_2171_length_2839_cov_0.943321_ID_4041
NODE_2175_length_2834_cov_2.12984_ID_4047
NODE_2176_length_2833_cov_1.20369_ID_4049
NODE_2195_length_2812_cov_0.932191_ID_4081
NODE_2199_length_2806_cov_1.53124_ID_4089
NODE_2212_length_2797_cov_1.68915_ID_4109
NODE_2231_length_2783_cov_2.15217_ID_4137
NODE_2233_length_2781_cov_0.991888_ID_4139
NODE_2246_length_2769_cov_2.06296_ID_4165
NODE_2249_length_2762_cov_0.628296_ID_4171
NODE_2252_length_2756_cov_1.98958_ID_4175
NODE_2254_length_2753_cov_1.61773_ID_4181
NODE_2261_length_2747_cov_0.973488_ID_4193
NODE_2267_length_2742_cov_1.42724_ID_4201
NODE_2272_length_2736_cov_2.11436_ID_4211
NODE_2275_length_2733_cov_1.9298_ID_4217
NODE_2278_length_2723_cov_1.5113_ID_4221
NODE_2281_length_2721_cov_2.04487_ID_4227
NODE_2285_length_2714_cov_1.73875_ID_4235
NODE_2295_length_2708_cov_0.981053_ID_4253
NODE_2305_length_2699_cov_1.46274_ID_4269
NODE_2309_length_2691_cov_1.12929_ID_4277
NODE_2310_length_2690_cov_1.91683_ID_4279
NODE_2336_length_2668_cov_1.67949_ID_4323
NODE_2338_length_2666_cov_0.994994_ID_4327
NODE_2349_length_2658_cov_1.42835_ID_4347
NODE_2354_length_2656_cov_1.78353_ID_4355
NODE_2360_length_2650_cov_0.801627_ID_4365
NODE_2365_length_2648_cov_0.544785_ID_4373
NODE_2374_length_2641_cov_1.44479_ID_4389
NODE_2378_length_2639_cov_1.46148_ID_4395
NODE_2400_length_2619_cov_0.964314_ID_4433
NODE_2401_length_2618_cov_1.45077_ID_4435
NODE_2402_length_2618_cov_1.24362_ID_4437
NODE_2403_length_2618_cov_1.14398_ID_4439
NODE_2404_length_2617_cov_0.900706_ID_4441
NODE_2405_length_2616_cov_1.07263_ID_4443
NODE_2427_length_2599_cov_1.42174_ID_4481
NODE_2442_length_2588_cov_1.14966_ID_4501
NODE_2447_length_2583_cov_1.81543_ID_4511
NODE_2450_length_2582_cov_2.1158_ID_4517
NODE_2452_length_2581_cov_0.77707_ID_4521
NODE_2459_length_2575_cov_1.29729_ID_4533
NODE_2464_length_2572_cov_1.70316_ID_4541
NODE_2468_length_2565_cov_0.651042_ID_4547
NODE_2473_length_2564_cov_0.991583_ID_4553
NODE_2479_length_2556_cov_1.49899_ID_4567
NODE_2495_length_2548_cov_0.933441_ID_4591
NODE_2500_length_2545_cov_1.47254_ID_4599
NODE_2519_length_2532_cov_0.866829_ID_4629
NODE_252_length_22364_cov_2.21983_ID_497
NODE_2532_length_2523_cov_1.27873_ID_4649
NODE_2551_length_2503_cov_1.41002_ID_4677
NODE_2558_length_2498_cov_1.56896_ID_4691
NODE_2564_length_2495_cov_2.02844_ID_4701
NODE_2569_length_2492_cov_1.29591_ID_4711
NODE_2587_length_2477_cov_1.3451_ID_4741
NODE_2591_length_2476_cov_1.28833_ID_4749
NODE_2596_length_2473_cov_1.1822_ID_4759
NODE_2602_length_2469_cov_2.37125_ID_4767
NODE_2618_length_2457_cov_1.13735_ID_4799
NODE_2628_length_2450_cov_0.637547_ID_4817
NODE_2629_length_2450_cov_2.48467_ID_4819
NODE_2638_length_2444_cov_2.28211_ID_4833
NODE_2639_length_2444_cov_1.23032_ID_4835
NODE_2640_length_2443_cov_1.41955_ID_4837
NODE_2645_length_2440_cov_1.23956_ID_4847
NODE_2647_length_2439_cov_2.01392_ID_4851
NODE_2651_length_2437_cov_1.26014_ID_4859
NODE_2654_length_2436_cov_0.99324_ID_4865
NODE_2662_length_2433_cov_1.35787_ID_4875
NODE_2665_length_2430_cov_0.661584_ID_4879
NODE_2668_length_2427_cov_3.46056_ID_4887
NODE_2676_length_2422_cov_0.826604_ID_4901
NODE_2688_length_2418_cov_1.66539_ID_4923
NODE_2691_length_2416_cov_1.33916_ID_4929
NODE_2700_length_2400_cov_1.44187_ID_4947
NODE_2725_length_2377_cov_1.05589_ID_4987
NODE_2733_length_2370_cov_1.70665_ID_5003
NODE_2735_length_2368_cov_1.08264_ID_5007
NODE_2740_length_2363_cov_1.62075_ID_5019
NODE_2774_length_2342_cov_2.01188_ID_5077
NODE_2775_length_2342_cov_2.12538_ID_5079
NODE_2807_length_2320_cov_1.06886_ID_5141
NODE_2813_length_2315_cov_0.81122_ID_5153
NODE_2816_length_2312_cov_1.16852_ID_5161
NODE_2819_length_2312_cov_1.00802_ID_5165
NODE_281_length_20415_cov_1.51848_ID_547
NODE_2848_length_2291_cov_1.23807_ID_5217
NODE_284_length_20350_cov_1.37503_ID_551
NODE_2850_length_2291_cov_1.02385_ID_5221
NODE_2863_length_2283_cov_1.2019_ID_5245
NODE_2867_length_2282_cov_1.29191_ID_5253
NODE_2898_length_2264_cov_1.27699_ID_5311
NODE_2938_length_2246_cov_2.40698_ID_5387
NODE_2941_length_2245_cov_1.08915_ID_5393
NODE_2955_length_2237_cov_1.38192_ID_5417
NODE_2964_length_2232_cov_0.804901_ID_5435
NODE_2982_length_2223_cov_1.74234_ID_5469
NODE_2986_length_2220_cov_1.26871_ID_5477
NODE_3014_length_2211_cov_1.32586_ID_5531
NODE_3030_length_2202_cov_0.812002_ID_5561
NODE_3032_length_2200_cov_2.52417_ID_5565
NODE_3049_length_2190_cov_0.826025_ID_5597
NODE_3058_length_2187_cov_0.913126_ID_5615
NODE_3067_length_2179_cov_1.09384_ID_5633
NODE_3073_length_2177_cov_0.928843_ID_5645
NODE_3077_length_2175_cov_1.01757_ID_5653
NODE_3085_length_2171_cov_1.37916_ID_5671
NODE_3087_length_2171_cov_1.5804_ID_5675
NODE_308_length_18553_cov_2.01444_ID_589
NODE_3099_length_2164_cov_1.92172_ID_5697
NODE_3103_length_2162_cov_1.2967_ID_5705
NODE_3104_length_2162_cov_1.52604_ID_5707
NODE_3108_length_2161_cov_1.08413_ID_5715
NODE_3130_length_2149_cov_1.53654_ID_5761
NODE_3145_length_2141_cov_1.32046_ID_5785
NODE_3150_length_2136_cov_2.01693_ID_5795
NODE_3157_length_2133_cov_2.81395_ID_32545
NODE_3165_length_2132_cov_1.57441_ID_5821
NODE_3186_length_2121_cov_0.780702_ID_5863
NODE_3189_length_2119_cov_1.63756_ID_5869
NODE_318_length_18156_cov_1.9033_ID_605
NODE_3204_length_2111_cov_1.10627_ID_5899
NODE_3210_length_2108_cov_0.74105_ID_5911
NODE_3213_length_2108_cov_1.88279_ID_5915
NODE_3219_length_2105_cov_2.6002_ID_5927
NODE_321_length_18019_cov_1.83354_ID_609
NODE_322_length_18018_cov_1.90428_ID_611
NODE_3246_length_2093_cov_1.62055_ID_5979
NODE_3248_length_2092_cov_0.986159_ID_5983
NODE_3251_length_2090_cov_1.45077_ID_5989
NODE_325_length_17861_cov_1.41873_ID_617
NODE_3263_length_2085_cov_1.03968_ID_6011
NODE_3269_length_2082_cov_1.09141_ID_6023
NODE_3274_length_2081_cov_0.974155_ID_6031
NODE_3306_length_2065_cov_0.675852_ID_6081
NODE_330_length_17580_cov_1.67084_ID_625
NODE_3313_length_2062_cov_1.47968_ID_6093
NODE_3317_length_2061_cov_1.31376_ID_6101
NODE_3320_length_2059_cov_1.59447_ID_6105
NODE_3333_length_2055_cov_1.54733_ID_6131
NODE_3340_length_2051_cov_1.55096_ID_6145
NODE_3363_length_2038_cov_1.19553_ID_6185
NODE_3371_length_2035_cov_0.84588_ID_6201
NODE_3380_length_2032_cov_1.81406_ID_6219
NODE_3397_length_2029_cov_0.40102_ID_6251
NODE_3407_length_2022_cov_0.857655_ID_6269
NODE_3415_length_2020_cov_1.46284_ID_6283
NODE_3417_length_2019_cov_1.23846_ID_6287
NODE_3429_length_2015_cov_1.04162_ID_6311
NODE_3443_length_2011_cov_1.0793_ID_6339
NODE_3444_length_2010_cov_2.49047_ID_6341
NODE_3450_length_2008_cov_1.25219_ID_6351
NODE_3473_length_2000_cov_0.802693_ID_6395
NODE_3493_length_1992_cov_0.75039_ID_6431
NODE_3524_length_1977_cov_0.764151_ID_6489
NODE_3550_length_1969_cov_1.07474_ID_6539
NODE_3557_length_1966_cov_0.592514_ID_6551
NODE_3565_length_1962_cov_0.962493_ID_6567
NODE_356_length_16181_cov_1.7289_ID_673
NODE_3577_length_1957_cov_0.881356_ID_6591
NODE_3581_length_1957_cov_1.11123_ID_6597
NODE_3599_length_1948_cov_1.15381_ID_6635
NODE_3624_length_1941_cov_0.80235_ID_6685
NODE_3629_length_1939_cov_1.44545_ID_6695
NODE_3631_length_1938_cov_0.919743_ID_6699
NODE_3646_length_1930_cov_0.78345_ID_6727
NODE_3651_length_1928_cov_1.25551_ID_6735
NODE_3659_length_1925_cov_0.745151_ID_6749
NODE_3663_length_1923_cov_1.07335_ID_6757
NODE_3674_length_1918_cov_0.66901_ID_6779
NODE_3711_length_1903_cov_1.22628_ID_6841
NODE_3719_length_1900_cov_0.577826_ID_6853
NODE_3733_length_1897_cov_1.54923_ID_6881
NODE_3739_length_1895_cov_1.20427_ID_6895
NODE_3754_length_1890_cov_1.58649_ID_6919
NODE_3760_length_1889_cov_1.55_ID_6931
NODE_3771_length_1884_cov_1.70248_ID_6953
NODE_3794_length_1878_cov_0.976783_ID_6997
NODE_3836_length_1864_cov_2.53259_ID_7077
NODE_383_length_15094_cov_2.79907_ID_725
NODE_3841_length_1863_cov_1.83222_ID_7087
NODE_3843_length_1863_cov_1.06355_ID_7091
NODE_3854_length_1857_cov_1.16499_ID_7113
NODE_3876_length_1850_cov_0.524986_ID_7155
NODE_390_length_14857_cov_1.52982_ID_737
NODE_392_length_14801_cov_1.75591_ID_741
NODE_3939_length_1829_cov_3.10341_ID_8683
NODE_3952_length_1825_cov_0.822323_ID_7305
NODE_3973_length_1819_cov_1.45771_ID_7341
NODE_3981_length_1817_cov_1.41876_ID_7355
NODE_3982_length_1816_cov_1.62793_ID_7357
NODE_399_length_14586_cov_2.64145_ID_757
NODE_4004_length_1809_cov_2.51379_ID_7401
NODE_4006_length_1809_cov_0.701149_ID_7405
NODE_4009_length_1809_cov_0.520115_ID_7411
NODE_4024_length_1806_cov_0.780656_ID_7441
NODE_4028_length_1805_cov_1.0023_ID_7449
NODE_4038_length_1802_cov_1.19908_ID_7469
NODE_4042_length_1801_cov_1.67379_ID_7477
NODE_405_length_14205_cov_1.61849_ID_773
NODE_4073_length_1792_cov_0.777713_ID_7537
NODE_4074_length_1792_cov_2.01219_ID_7539
NODE_4076_length_1792_cov_0.69704_ID_7543
NODE_4089_length_1789_cov_0.963953_ID_7567
NODE_4092_length_1788_cov_1.58232_ID_7573
NODE_4101_length_1785_cov_1.78263_ID_7589
NODE_410_length_13867_cov_1.32657_ID_785
NODE_4128_length_1776_cov_0.869361_ID_7641
NODE_412_length_13831_cov_2.37313_ID_789
NODE_4134_length_1774_cov_1.78416_ID_7653
NODE_4135_length_1774_cov_1.68211_ID_7655
NODE_4138_length_1772_cov_1.95361_ID_7661
NODE_4141_length_1771_cov_1.73972_ID_7667
NODE_414_length_13644_cov_1.28582_ID_791
NODE_4156_length_1768_cov_2.01707_ID_7695
NODE_4159_length_1768_cov_0.852855_ID_7701
NODE_4172_length_1764_cov_0.916814_ID_7727
NODE_4179_length_1762_cov_0.992321_ID_7739
NODE_4188_length_1759_cov_1.49941_ID_7757
NODE_4194_length_1757_cov_2.47334_ID_7767
NODE_4202_length_1755_cov_1.33986_ID_7783
NODE_420_length_13455_cov_2.22053_ID_803
NODE_4210_length_1752_cov_1.0814_ID_7797
NODE_4212_length_1752_cov_0.439097_ID_7801
NODE_4241_length_1741_cov_0.943182_ID_7861
NODE_4246_length_1740_cov_1.70736_ID_7871
NODE_4253_length_1737_cov_1.46763_ID_7885
NODE_4274_length_1731_cov_1.15162_ID_7925
NODE_4276_length_1731_cov_1.64801_ID_7929
NODE_4304_length_1722_cov_0.655777_ID_7985
NODE_4311_length_1720_cov_0.98728_ID_7999
NODE_431_length_13133_cov_1.85364_ID_819
NODE_4326_length_1717_cov_1.85194_ID_8025
NODE_432_length_13124_cov_1.38407_ID_821
NODE_4332_length_1715_cov_1.77825_ID_8035
NODE_4339_length_1713_cov_1.70803_ID_8047
NODE_4350_length_1710_cov_0.931749_ID_8069
NODE_435_length_13027_cov_1.70335_ID_831
NODE_4379_length_1702_cov_0.517453_ID_8123
NODE_4388_length_1700_cov_1.47885_ID_8139
NODE_438_length_12939_cov_2.56597_ID_837
NODE_4437_length_1684_cov_0.406192_ID_8239
NODE_4442_length_1683_cov_1.08674_ID_8249
NODE_4444_length_1682_cov_1.08184_ID_8253
NODE_4454_length_1678_cov_0.568055_ID_8273
NODE_4472_length_1673_cov_0.753117_ID_8307
NODE_4473_length_1672_cov_1.80162_ID_8309
NODE_4503_length_1664_cov_0.524765_ID_8367
NODE_451_length_12698_cov_1.62903_ID_851
NODE_4524_length_1659_cov_2.07421_ID_8409
NODE_452_length_12620_cov_2.69341_ID_853
NODE_4537_length_1657_cov_1.77078_ID_8437
NODE_455_length_12467_cov_1.99564_ID_861
NODE_456_length_12353_cov_1.72305_ID_869
NODE_4572_length_1648_cov_1.47815_ID_8501
NODE_4573_length_1648_cov_0.983534_ID_8503
NODE_4585_length_1644_cov_2.38159_ID_8529
NODE_4610_length_1639_cov_1.11656_ID_8577
NODE_4611_length_1639_cov_2.07707_ID_8579
NODE_4617_length_1637_cov_1.46747_ID_8591
NODE_4624_length_1634_cov_1.44153_ID_8605
NODE_4627_length_1634_cov_0.907348_ID_8613
NODE_4634_length_1631_cov_0.673496_ID_8629
NODE_4638_length_1631_cov_1.18502_ID_8637
NODE_4639_length_1631_cov_0.701665_ID_8639
NODE_4676_length_1622_cov_1.73793_ID_8709
NODE_467_length_11992_cov_1.42171_ID_887
NODE_4690_length_1620_cov_1.2334_ID_8737
NODE_470_length_11893_cov_1.38422_ID_895
NODE_4711_length_1615_cov_0.719922_ID_8775
NODE_4713_length_1614_cov_1.41424_ID_8779
NODE_4719_length_1613_cov_0.762306_ID_8791
NODE_4730_length_1611_cov_1.56355_ID_8811
NODE_4742_length_1609_cov_1.57532_ID_8833
NODE_4746_length_1608_cov_1.01105_ID_8841
NODE_476_length_11739_cov_1.67669_ID_903
NODE_4793_length_1595_cov_1.09567_ID_8931
NODE_4801_length_1592_cov_1.4977_ID_8947
NODE_4814_length_1588_cov_1.19552_ID_8971
NODE_4819_length_1588_cov_0.629361_ID_8981
NODE_4836_length_1584_cov_1.18548_ID_9019
NODE_4850_length_1581_cov_2.20106_ID_9049
NODE_488_length_11583_cov_1.33637_ID_919
NODE_489_length_11569_cov_2.12374_ID_921
NODE_490_length_11559_cov_1.33455_ID_923
NODE_4911_length_1566_cov_1.998_ID_9167
NODE_4952_length_1559_cov_1.65101_ID_9245
NODE_4957_length_1557_cov_0.6875_ID_9255
NODE_4973_length_1553_cov_1.22709_ID_9285
NODE_4985_length_1551_cov_1.32456_ID_9309
NODE_4989_length_1551_cov_1.33671_ID_9317
NODE_4996_length_1549_cov_0.726351_ID_9331
NODE_5008_length_1546_cov_0.656737_ID_9351
NODE_500_length_11336_cov_1.79471_ID_939
NODE_5030_length_1542_cov_0.862865_ID_9395
NODE_505_length_11185_cov_2.11326_ID_947
NODE_5068_length_1533_cov_1.46995_ID_9465
NODE_5090_length_1529_cov_0.986301_ID_9509
NODE_5093_length_1528_cov_1.06854_ID_9515
NODE_510_length_10981_cov_1.39644_ID_959
NODE_5136_length_1521_cov_0.816804_ID_9601
NODE_5198_length_1509_cov_0.977778_ID_9725
NODE_5209_length_1506_cov_1.37091_ID_9747
NODE_521_length_10809_cov_1.09376_ID_973
NODE_5244_length_1499_cov_0.671329_ID_9809
NODE_527_length_10749_cov_1.26479_ID_981
NODE_528_length_10743_cov_1.39385_ID_983
NODE_5298_length_1491_cov_0.795359_ID_9913
NODE_530_length_10694_cov_2.77901_ID_989
NODE_533_length_10644_cov_1.81059_ID_993
NODE_5347_length_1479_cov_0.946809_ID_10009
NODE_5350_length_1478_cov_1.58978_ID_10015
NODE_535_length_10597_cov_2.03894_ID_995
NODE_5362_length_1475_cov_1.13798_ID_10039
NODE_5382_length_1472_cov_1.18033_ID_10079
NODE_5396_length_1468_cov_0.756969_ID_10105
NODE_539_length_10560_cov_1.78629_ID_1003
NODE_5417_length_1464_cov_1.5491_ID_10149
NODE_541_length_10479_cov_1.59616_ID_1007
NODE_5423_length_1463_cov_0.727403_ID_10161
NODE_5427_length_1463_cov_0.93472_ID_10169
NODE_542_length_10441_cov_1.57009_ID_1011
NODE_545_length_10383_cov_1.89548_ID_1021
NODE_5470_length_1455_cov_2.28355_ID_10255
NODE_547_length_10354_cov_1.37073_ID_1025
NODE_548_length_10282_cov_1.76677_ID_1029
NODE_550_length_10221_cov_1.50601_ID_1035
NODE_5512_length_1448_cov_2.93474_ID_10339
NODE_5534_length_1443_cov_1.34862_ID_10379
NODE_554_length_10128_cov_2.5592_ID_1045
NODE_5565_length_1437_cov_1.21418_ID_10437
NODE_5566_length_1437_cov_1.10161_ID_10439
NODE_5567_length_1437_cov_0.633772_ID_10441
NODE_556_length_10114_cov_1.95321_ID_1049
NODE_5599_length_1433_cov_0.88563_ID_10503
NODE_5607_length_1432_cov_0.735877_ID_10519
NODE_5613_length_1431_cov_0.678414_ID_10531
NODE_5616_length_1431_cov_0.502937_ID_10537
NODE_5624_length_1429_cov_1.16103_ID_10555
NODE_5639_length_1427_cov_1.20471_ID_10583
NODE_563_length_10041_cov_2.14099_ID_1057
NODE_5640_length_1427_cov_0.714286_ID_10585
NODE_5643_length_1427_cov_0.612666_ID_10591
NODE_5647_length_1426_cov_0.750184_ID_10599
NODE_565_length_10027_cov_1.67895_ID_1059
NODE_5663_length_1424_cov_1.01181_ID_10629
NODE_5670_length_1423_cov_1.14845_ID_10641
NODE_567_length_9960_cov_1.51886_ID_1061
NODE_568_length_9959_cov_2.01213_ID_1063
NODE_5695_length_1418_cov_1.95033_ID_10689
NODE_5701_length_1417_cov_1.35386_ID_10701
NODE_572_length_9868_cov_1.67599_ID_1069
NODE_573_length_9862_cov_2.64515_ID_1071
NODE_5744_length_1408_cov_0.90814_ID_10789
NODE_575_length_9825_cov_1.7785_ID_1075
NODE_5767_length_1405_cov_1.32111_ID_10835
NODE_576_length_9806_cov_1.94927_ID_1079
NODE_579_length_9762_cov_1.89095_ID_1087
NODE_5808_length_1398_cov_1.23175_ID_10915
NODE_5825_length_1394_cov_1.56151_ID_10949
NODE_5839_length_1392_cov_1.07559_ID_10977
NODE_585_length_9674_cov_1.99344_ID_1095
NODE_5868_length_1387_cov_0.677542_ID_11029
NODE_586_length_9647_cov_1.45803_ID_1097
NODE_5880_length_1385_cov_0.833587_ID_11053
NODE_5887_length_1384_cov_1.2289_ID_11067
NODE_5899_length_1382_cov_0.856816_ID_11091
NODE_589_length_9575_cov_1.62603_ID_1099
NODE_590_length_9574_cov_1.84356_ID_1101
NODE_5920_length_1379_cov_0.619847_ID_11133
NODE_5933_length_1377_cov_0.37844_ID_11161
NODE_5958_length_1372_cov_0.697621_ID_11209
NODE_5962_length_1371_cov_1.17588_ID_11217
NODE_596_length_9531_cov_2.2267_ID_1109
NODE_598_length_9493_cov_1.83584_ID_1113
NODE_5992_length_1366_cov_1.00617_ID_11275
NODE_5993_length_1365_cov_0.910494_ID_11277
NODE_6038_length_1358_cov_0.689682_ID_11357
NODE_6039_length_1358_cov_0.822343_ID_11359
NODE_603_length_9413_cov_1.58027_ID_1123
NODE_607_length_9293_cov_2.43961_ID_1131
NODE_6082_length_1351_cov_2.50858_ID_11445
NODE_6092_length_1349_cov_0.964063_ID_11463
NODE_609_length_9242_cov_1.54322_ID_1137
NODE_610_length_9238_cov_2.67761_ID_1139
NODE_6131_length_1343_cov_0.453689_ID_11537
NODE_614_length_9050_cov_1.63612_ID_1145
NODE_6157_length_1338_cov_0.827423_ID_11589
NODE_615_length_9031_cov_1.41665_ID_1147
NODE_616_length_9016_cov_1.69476_ID_1151
NODE_619_length_8977_cov_1.79064_ID_1159
NODE_6200_length_1331_cov_1.40333_ID_11669
NODE_6201_length_1331_cov_0.820919_ID_11671
NODE_6204_length_1331_cov_0.833597_ID_11677
NODE_6234_length_1327_cov_1.14388_ID_11733
NODE_6237_length_1327_cov_0.914149_ID_11739
NODE_6245_length_1326_cov_0.909308_ID_11755
NODE_625_length_8903_cov_1.36801_ID_1169
NODE_6260_length_1324_cov_0.642231_ID_11785
NODE_627_length_8892_cov_2.7791_ID_1171
NODE_6280_length_1321_cov_0.635783_ID_11823
NODE_6285_length_1320_cov_1.28857_ID_11833
NODE_628_length_8872_cov_1.53005_ID_1173
NODE_6290_length_1320_cov_1.13509_ID_11843
NODE_629_length_8866_cov_1.4131_ID_1175
NODE_6305_length_1318_cov_0.734988_ID_11873
NODE_6307_length_1318_cov_0.931145_ID_11877
NODE_630_length_8863_cov_1.35604_ID_1177
NODE_6317_length_1317_cov_0.78766_ID_11893
NODE_6331_length_1314_cov_0.376707_ID_11921
NODE_6337_length_1314_cov_0.742169_ID_11931
NODE_6360_length_1311_cov_1.3277_ID_11977
NODE_636_length_8745_cov_1.60166_ID_1189
NODE_638_length_8718_cov_2.09411_ID_1195
NODE_6417_length_1303_cov_2.28444_ID_12085
NODE_642_length_8690_cov_1.69725_ID_1207
NODE_6476_length_1294_cov_1.55918_ID_12197
NODE_6484_length_1294_cov_1.20327_ID_12213
NODE_6488_length_1293_cov_0.870915_ID_12221
NODE_6496_length_1291_cov_0.750409_ID_12237
NODE_649_length_8588_cov_2.23301_ID_1227
NODE_6521_length_1287_cov_1.58539_ID_12287
NODE_653_length_8566_cov_1.37707_ID_1235
NODE_6554_length_1282_cov_0.713932_ID_12349
NODE_6557_length_1281_cov_1.63531_ID_12355
NODE_6559_length_1281_cov_0.713696_ID_12359
NODE_6566_length_1280_cov_2.49628_ID_12373
NODE_656_length_8548_cov_1.31207_ID_1245
NODE_658_length_8540_cov_1.68115_ID_1249
NODE_661_length_8487_cov_2.95605_ID_1255
NODE_662_length_8485_cov_1.60195_ID_1257
NODE_664_length_8454_cov_1.58974_ID_1259
NODE_666_length_8445_cov_2.10041_ID_1263
NODE_670_length_8425_cov_1.1679_ID_1267
NODE_6713_length_1262_cov_1.16178_ID_12665
NODE_6714_length_1262_cov_0.861693_ID_12667
NODE_671_length_8404_cov_1.82507_ID_1273
NODE_6738_length_1259_cov_0.942857_ID_12711
NODE_673_length_8397_cov_1.90382_ID_1275
NODE_678_length_8329_cov_1.6138_ID_1279
NODE_680_length_8318_cov_1.46175_ID_1285
NODE_6811_length_1251_cov_0.709814_ID_12855
NODE_6819_length_1250_cov_1.00931_ID_12871
NODE_681_length_8292_cov_1.287_ID_1287
NODE_6826_length_1250_cov_0.752752_ID_12885
NODE_6833_length_1249_cov_0.881356_ID_12899
NODE_684_length_8253_cov_1.81647_ID_1293
NODE_685_length_8253_cov_1.92107_ID_1295
NODE_6874_length_1242_cov_0.530264_ID_12979
NODE_6884_length_1240_cov_1.09821_ID_12999
NODE_689_length_8222_cov_2.05078_ID_1307
NODE_6903_length_1238_cov_1.26262_ID_13033
NODE_6938_length_1233_cov_0.733677_ID_13099
NODE_694_length_8162_cov_1.3954_ID_1313
NODE_695_length_8154_cov_1.83661_ID_1315
NODE_6973_length_1230_cov_2.42636_ID_13161
NODE_698_length_8089_cov_1.23603_ID_1319
NODE_700_length_8035_cov_1.63118_ID_1323
NODE_7033_length_1221_cov_0.923611_ID_13275
NODE_703_length_8026_cov_1.08257_ID_1327
NODE_7061_length_1217_cov_0.510453_ID_13329
NODE_7075_length_1215_cov_2.76003_ID_13359
NODE_707_length_7985_cov_1.52729_ID_1333
NODE_7106_length_1211_cov_1.16025_ID_13419
NODE_7126_length_1209_cov_0.505263_ID_13461
NODE_712_length_7966_cov_1.60694_ID_1343
NODE_713_length_7952_cov_1.67842_ID_1345
NODE_7151_length_1206_cov_1.04222_ID_13511
NODE_716_length_7931_cov_1.96973_ID_1349
NODE_722_length_7836_cov_2.3399_ID_1361
NODE_7230_length_1196_cov_0.748891_ID_13663
NODE_723_length_7830_cov_0.815488_ID_1363
NODE_724_length_7791_cov_1.45286_ID_1369
NODE_7262_length_1192_cov_1.23598_ID_13729
NODE_726_length_7778_cov_1.56778_ID_1371
NODE_7294_length_1188_cov_0.466488_ID_13791
NODE_729_length_7768_cov_1.15301_ID_1377
NODE_732_length_7750_cov_1.53287_ID_1383
NODE_7346_length_1183_cov_0.967684_ID_13893
NODE_734_length_7745_cov_2.56879_ID_1387
NODE_7372_length_1179_cov_1.37928_ID_13943
NODE_7394_length_1176_cov_1.36405_ID_13985
NODE_7455_length_1168_cov_0.581438_ID_14103
NODE_7456_length_1168_cov_0.894449_ID_14105
NODE_747_length_7583_cov_1.43931_ID_1413
NODE_748_length_7544_cov_1.7814_ID_1417
NODE_7508_length_1161_cov_0.950549_ID_14205
NODE_750_length_7534_cov_0.933958_ID_1421
NODE_755_length_7500_cov_1.77244_ID_1431
NODE_756_length_7491_cov_1.69078_ID_1433
NODE_758_length_7476_cov_1.21291_ID_1435
NODE_7594_length_1151_cov_0.89464_ID_14375
NODE_759_length_7467_cov_2.32698_ID_1437
NODE_7619_length_1149_cov_0.331481_ID_14425
NODE_761_length_7451_cov_1.87158_ID_1441
NODE_7623_length_1148_cov_0.686747_ID_14433
NODE_764_length_7415_cov_1.55064_ID_1447
NODE_766_length_7344_cov_1.97113_ID_1453
NODE_7671_length_1143_cov_1.21136_ID_14525
NODE_7678_length_1143_cov_0.641527_ID_14539
NODE_767_length_7340_cov_1.0623_ID_1455
NODE_7700_length_1140_cov_1.21475_ID_14581
NODE_776_length_7236_cov_1.39473_ID_1477
NODE_7775_length_1132_cov_0.60207_ID_14729
NODE_7780_length_1131_cov_0.669492_ID_14739
NODE_7788_length_1131_cov_0.741996_ID_14755
NODE_778_length_7226_cov_1.57007_ID_1481
NODE_780_length_7180_cov_2.60273_ID_2667
NODE_781_length_7179_cov_1.43249_ID_1483
NODE_7821_length_1127_cov_1.11342_ID_14819
NODE_7855_length_1125_cov_0.747159_ID_14885
NODE_7887_length_1121_cov_1.173_ID_14951
NODE_7913_length_1118_cov_0.455672_ID_15003
NODE_7917_length_1117_cov_0.885496_ID_15007
NODE_791_length_7125_cov_1.60842_ID_1499
NODE_792_length_7116_cov_1.84007_ID_1501
NODE_794_length_7074_cov_1.63769_ID_1505
NODE_795_length_7066_cov_0.927255_ID_1509
NODE_796_length_7062_cov_1.52796_ID_1511
NODE_797_length_7054_cov_1.78712_ID_1513
NODE_7995_length_1110_cov_1.99808_ID_15159
NODE_8001_length_1109_cov_0.915385_ID_15171
NODE_8014_length_1107_cov_0.550096_ID_15197
NODE_801_length_7032_cov_2.12193_ID_1523
NODE_8023_length_1106_cov_0.648987_ID_15215
NODE_803_length_7028_cov_2.16885_ID_1527
NODE_8052_length_1103_cov_0.535783_ID_15273
NODE_8057_length_1103_cov_0.909091_ID_15283
NODE_8059_length_1102_cov_1.0726_ID_15287
NODE_8084_length_1099_cov_0.494175_ID_15337
NODE_8092_length_1098_cov_2.37318_ID_15353
NODE_813_length_6964_cov_1.51414_ID_1549
NODE_814_length_6961_cov_1.77815_ID_1551
NODE_815_length_6939_cov_1.91325_ID_1557
NODE_8164_length_1091_cov_1.00783_ID_15493
NODE_8180_length_1089_cov_0.876471_ID_15523
NODE_8186_length_1089_cov_1.23824_ID_15535
NODE_818_length_6932_cov_1.77342_ID_1561
NODE_820_length_6917_cov_1.78957_ID_1565
NODE_821_length_6910_cov_2.15553_ID_1567
NODE_8238_length_1084_cov_0.479803_ID_15635
NODE_823_length_6904_cov_1.41141_ID_1571
NODE_825_length_6897_cov_1.94713_ID_1575
NODE_826_length_6894_cov_1.41172_ID_1577
NODE_828_length_6886_cov_2.15095_ID_1581
NODE_829_length_6883_cov_2.35163_ID_1583
NODE_8315_length_1076_cov_1.35055_ID_15781
NODE_8322_length_1075_cov_0.806163_ID_15795
NODE_832_length_6825_cov_0.971877_ID_1593
NODE_833_length_6818_cov_1.92992_ID_1595
NODE_835_length_6808_cov_1.83974_ID_1599
NODE_836_length_6804_cov_2.60356_ID_1601
NODE_8378_length_1069_cov_0.496_ID_15903
NODE_8380_length_1069_cov_1.202_ID_15907
NODE_8394_length_1068_cov_0.810811_ID_15935
NODE_8395_length_1068_cov_1.01902_ID_15937
NODE_839_length_6792_cov_2.0595_ID_1607
NODE_841_length_6773_cov_1.53132_ID_1611
NODE_8433_length_1065_cov_1.39558_ID_16011
NODE_845_length_6712_cov_1.34638_ID_1613
NODE_8461_length_1063_cov_0.519115_ID_16067
NODE_8476_length_1062_cov_1.16818_ID_16095
NODE_849_length_6670_cov_1.38237_ID_1617
NODE_853_length_6604_cov_1.66335_ID_1625
NODE_8546_length_1055_cov_0.717039_ID_16231
NODE_855_length_6593_cov_2.39332_ID_1629
NODE_8566_length_1054_cov_0.479188_ID_16269
NODE_8569_length_1053_cov_1.62398_ID_16275
NODE_856_length_6590_cov_1.61509_ID_1631
NODE_857_length_6580_cov_1.10183_ID_1633
NODE_861_length_6550_cov_1.2998_ID_1643
NODE_862_length_6548_cov_1.14493_ID_1645
NODE_863_length_6546_cov_2.03752_ID_1647
NODE_864_length_6524_cov_1.3718_ID_1649
NODE_870_length_6463_cov_2.04973_ID_1663
NODE_871_length_6452_cov_1.53846_ID_1665
NODE_872_length_6434_cov_1.22294_ID_1667
NODE_873_length_6421_cov_1.23898_ID_1671
NODE_874_length_6421_cov_2.78054_ID_1673
NODE_8773_length_1036_cov_1.50569_ID_16675
NODE_8788_length_1035_cov_1.12008_ID_16705
NODE_879_length_6401_cov_3.07012_ID_1679
NODE_8804_length_1034_cov_2.29741_ID_16737
NODE_8809_length_1033_cov_0.941909_ID_16745
NODE_8830_length_1032_cov_0.646937_ID_16787
NODE_883_length_6381_cov_2.30878_ID_1685
NODE_8846_length_1031_cov_1.30457_ID_16817
NODE_8854_length_1030_cov_0.684703_ID_16831
NODE_8859_length_1029_cov_0.6_ID_16839
NODE_885_length_6373_cov_1.7573_ID_1691
NODE_886_length_6367_cov_1.43681_ID_1693
NODE_888_length_6365_cov_1.73094_ID_1697
NODE_8927_length_1024_cov_1.26806_ID_16973
NODE_8980_length_1019_cov_0.650526_ID_17075
NODE_898_length_6273_cov_1.82495_ID_1719
NODE_899_length_6273_cov_1.51209_ID_1721
NODE_9002_length_1016_cov_0.804646_ID_17117
NODE_901_length_6253_cov_1.45472_ID_1725
NODE_902_length_6249_cov_2.01748_ID_1727
NODE_903_length_6241_cov_2.47732_ID_1729
NODE_9040_length_1014_cov_0.983069_ID_17187
NODE_906_length_6221_cov_1.70319_ID_1733
NODE_908_length_6198_cov_1.85642_ID_1739
NODE_909_length_6195_cov_1.14528_ID_1741
NODE_911_length_6173_cov_1.2174_ID_1747
NODE_912_length_6151_cov_1.18842_ID_1751
NODE_9138_length_1006_cov_2.50374_ID_17377
NODE_9152_length_1005_cov_0.736111_ID_17407
NODE_9159_length_1005_cov_0.824786_ID_17421
NODE_915_length_6136_cov_1.29685_ID_1761
NODE_916_length_6120_cov_1.30078_ID_1765
NODE_917_length_6100_cov_1.66142_ID_1767
NODE_9181_length_1002_cov_1.32797_ID_17467
NODE_921_length_6075_cov_1.32651_ID_1773
NODE_924_length_6047_cov_1.39328_ID_1779
NODE_926_length_6024_cov_1.72208_ID_1781
NODE_928_length_6013_cov_1.76497_ID_1785
NODE_930_length_6000_cov_1.41393_ID_1789
NODE_933_length_5988_cov_2.04325_ID_2097
NODE_936_length_5957_cov_1.59698_ID_1797
NODE_938_length_5940_cov_0.894737_ID_1801
NODE_939_length_5932_cov_2.34522_ID_1805
NODE_942_length_5918_cov_1.21132_ID_1811
NODE_945_length_5904_cov_1.13162_ID_1817
NODE_947_length_5890_cov_1.54011_ID_1821
NODE_950_length_5876_cov_1.71603_ID_1825
NODE_954_length_5853_cov_1.34993_ID_1833
NODE_955_length_5841_cov_1.76403_ID_1837
NODE_958_length_5797_cov_2.60056_ID_1841
NODE_959_length_5791_cov_1.15938_ID_1843
NODE_960_length_5780_cov_1.36211_ID_1845
NODE_962_length_5761_cov_1.40987_ID_1849
NODE_967_length_5751_cov_1.23478_ID_1857
NODE_971_length_5716_cov_1.43722_ID_1865
NODE_976_length_5686_cov_1.35713_ID_1873
NODE_979_length_5671_cov_1.46055_ID_1879
NODE_980_length_5667_cov_1.80136_ID_1881
NODE_982_length_5664_cov_1.24021_ID_1883
NODE_986_length_5660_cov_2.20712_ID_1891
NODE_987_length_5659_cov_1.34705_ID_1893
NODE_998_length_5602_cov_1.47913_ID_1909
NODE_999_length_5601_cov_0.96945_ID_1911

## Sheet: Group6
NODE_102_length_60699_cov_3.3765_ID_215
NODE_103_length_60656_cov_4.3017_ID_201
NODE_1040_length_5393_cov_3.22295_ID_2417
NODE_1042_length_5367_cov_2.41978_ID_1995
NODE_107_length_58778_cov_3.66179_ID_207
NODE_1081_length_5157_cov_4.42512_ID_2069
NODE_108_length_58506_cov_3.79795_ID_211
NODE_1105_length_5033_cov_4.22099_ID_2115
NODE_111_length_55705_cov_4.25942_ID_229
NODE_114_length_54373_cov_3.35528_ID_221
NODE_115_length_54165_cov_3.46103_ID_225
NODE_1193_length_4679_cov_2.24469_ID_2297
NODE_120_length_51620_cov_3.89781_ID_233
NODE_122_length_50807_cov_3.90331_ID_235
NODE_123_length_50785_cov_3.67363_ID_237
NODE_1243_length_4523_cov_3.66502_ID_2387
NODE_126_length_50015_cov_4.02206_ID_241
NODE_136_length_43914_cov_4.18431_ID_289
NODE_137_length_43608_cov_4.57695_ID_259
NODE_1380_length_4116_cov_5.44057_ID_2651
NODE_141_length_42240_cov_3.69811_ID_271
NODE_147_length_40877_cov_4.43418_ID_283
NODE_1481_length_3849_cov_6.36561_ID_18655
NODE_1496_length_3808_cov_2.34688_ID_2891
NODE_149_length_40192_cov_3.53765_ID_287
NODE_150_length_39947_cov_3.52322_ID_295
NODE_1525_length_3744_cov_2.92735_ID_91695
NODE_154_length_38436_cov_3.99427_ID_303
NODE_157_length_38039_cov_4.70635_ID_311
NODE_163_length_37467_cov_3.55508_ID_317
NODE_170_length_34791_cov_4.64714_ID_335
NODE_173_length_34261_cov_3.73614_ID_337
NODE_1757_length_3361_cov_3.33809_ID_3321
NODE_1770_length_3342_cov_2.48213_ID_3341
NODE_179_length_33235_cov_3.43988_ID_347
NODE_180_length_32848_cov_3.22649_ID_351
NODE_1825_length_3281_cov_2.70455_ID_3439
NODE_1930_length_3128_cov_3.22426_ID_3623
NODE_200_length_28760_cov_4.43735_ID_401
NODE_201_length_28393_cov_4.64052_ID_409
NODE_204_length_28189_cov_3.85192_ID_395
NODE_205_length_28160_cov_4.15243_ID_397
NODE_2074_length_2937_cov_2.5387_ID_3867
NODE_207_length_27653_cov_5.06395_ID_417
NODE_208_length_27516_cov_3.29326_ID_403
NODE_212_length_26907_cov_3.60433_ID_419
NODE_213_length_26832_cov_4.62486_ID_431
NODE_217_length_26371_cov_3.90427_ID_427
NODE_218_length_26353_cov_2.36349_ID_429
NODE_219_length_26118_cov_3.5538_ID_433
NODE_220_length_26053_cov_3.36788_ID_435
NODE_2237_length_2776_cov_2.81455_ID_4149
NODE_226_length_25434_cov_3.55407_ID_449
NODE_230_length_24672_cov_3.06495_ID_455
NODE_2321_length_2685_cov_2.74427_ID_4299
NODE_232_length_24450_cov_3.78881_ID_461
NODE_2334_length_2670_cov_3.31911_ID_4319
NODE_237_length_24125_cov_4.01758_ID_469
NODE_244_length_23077_cov_3.69519_ID_479
NODE_245_length_22948_cov_3.76223_ID_481
NODE_247_length_22846_cov_3.0461_ID_483
NODE_249_length_22698_cov_4.34469_ID_487
NODE_24_length_137297_cov_4.00163_ID_43
NODE_251_length_22629_cov_3.65532_ID_491
NODE_253_length_22344_cov_3.69253_ID_499
NODE_259_length_21535_cov_3.19319_ID_507
NODE_25_length_132016_cov_4.05223_ID_47
NODE_264_length_21281_cov_3.61866_ID_515
NODE_266_length_21235_cov_3.79269_ID_519
NODE_269_length_21114_cov_5.03668_ID_543
NODE_26_length_128766_cov_5.36933_ID_49
NODE_270_length_21095_cov_3.88048_ID_525
NODE_275_length_20813_cov_5.94312_ID_559
NODE_276_length_20762_cov_3.7316_ID_539
NODE_279_length_20596_cov_3.79412_ID_567
NODE_280_length_20478_cov_4.68592_ID_545
NODE_282_length_20408_cov_2.86587_ID_549
NODE_286_length_19993_cov_4.2379_ID_555
NODE_288_length_19765_cov_3.20903_ID_577
NODE_305_length_18700_cov_3.48854_ID_585
NODE_3176_length_2127_cov_5.55685_ID_5845
NODE_327_length_17828_cov_3.37181_ID_619
NODE_334_length_17269_cov_3.49622_ID_635
NODE_3540_length_1972_cov_2.18129_ID_6519
NODE_358_length_16083_cov_3.29218_ID_677
NODE_359_length_16074_cov_4.08597_ID_679
NODE_3704_length_1906_cov_5.04627_ID_91335
NODE_371_length_15530_cov_3.09475_ID_703
NODE_372_length_15493_cov_4.39977_ID_705
NODE_377_length_15238_cov_3.41295_ID_719
NODE_389_length_14873_cov_3.45616_ID_735
NODE_38_length_105175_cov_4.08747_ID_73
NODE_3967_length_1821_cov_3.01541_ID_91917
NODE_396_length_14696_cov_4.36932_ID_751
NODE_404_length_14240_cov_2.68965_ID_769
NODE_41_length_103017_cov_4.43992_ID_79
NODE_427_length_13264_cov_3.9064_ID_815
NODE_4323_length_1718_cov_4.81079_ID_91627
NODE_450_length_12713_cov_5.32252_ID_927
NODE_4590_length_1643_cov_3.5_ID_8539
NODE_460_length_12082_cov_3.51386_ID_873
NODE_464_length_12027_cov_4.2145_ID_881
NODE_478_length_11733_cov_3.90123_ID_907
NODE_47_length_94080_cov_3.61286_ID_91
NODE_483_length_11639_cov_2.77597_ID_913
NODE_487_length_11584_cov_3.41737_ID_917
NODE_492_length_11520_cov_3.33028_ID_925
NODE_495_length_11441_cov_3.914_ID_929
NODE_49_length_92234_cov_3.78457_ID_95
NODE_508_length_11006_cov_3.81659_ID_953
NODE_520_length_10814_cov_2.56138_ID_971
NODE_524_length_10794_cov_3.02368_ID_975
NODE_52_length_89493_cov_3.69115_ID_101
NODE_53_length_89366_cov_5.06671_ID_105
NODE_560_length_10087_cov_3.21461_ID_1053
NODE_561_length_10051_cov_2.86746_ID_1055
NODE_56_length_87166_cov_3.77935_ID_107
NODE_571_length_9897_cov_2.90893_ID_1065
NODE_57_length_86780_cov_4.56613_ID_111
NODE_594_length_9555_cov_3.93042_ID_1253
NODE_600_length_9442_cov_3.03211_ID_1119
NODE_608_length_9280_cov_3.27304_ID_1133
NODE_631_length_8856_cov_3.15637_ID_1179
NODE_6399_length_1306_cov_2.21423_ID_12051
NODE_640_length_8702_cov_2.76937_ID_1203
NODE_645_length_8650_cov_4.38981_ID_1219
NODE_657_length_8541_cov_2.92422_ID_1247
NODE_6699_length_1263_cov_3.87102_ID_12639
NODE_66_length_81768_cov_4.63501_ID_127
NODE_686_length_8251_cov_4.12967_ID_1297
NODE_720_length_7865_cov_3.26898_ID_1359
NODE_7216_length_1198_cov_5.41098_ID_91667
NODE_745_length_7617_cov_4.4115_ID_1409
NODE_751_length_7513_cov_3.85613_ID_1425
NODE_763_length_7418_cov_3.26616_ID_1445
NODE_76_length_74113_cov_5.35229_ID_147
NODE_7_length_275427_cov_4.50538_ID_13
NODE_83_length_70397_cov_3.73624_ID_161
NODE_859_length_6563_cov_3.70896_ID_1639
NODE_88_length_68900_cov_5.38682_ID_171
NODE_89_length_66519_cov_3.45216_ID_173
NODE_919_length_6095_cov_3.75639_ID_1771
NODE_91_length_65896_cov_3.90434_ID_175
NODE_92_length_65633_cov_3.22366_ID_179
NODE_93_length_65562_cov_3.72751_ID_177
NODE_94_length_64927_cov_3.78314_ID_181
NODE_96_length_62949_cov_4.706_ID_191
NODE_975_length_5688_cov_4.32657_ID_1871
NODE_978_length_5676_cov_4.54004_ID_1877
NODE_994_length_5627_cov_2.93793_ID_1983

## Sheet: Group7
NODE_1_length_2227221_cov_20.5728_ID_1
NODE_2_length_2148636_cov_19.7403_ID_3
NODE_4_length_361866_cov_18.9044_ID_7

## Sheet: Group8
NODE_1278_length_4401_cov_3.07872_ID_2453
NODE_1294_length_4358_cov_4.17114_ID_3579
NODE_12_length_179153_cov_5.02756_ID_23
NODE_138_length_43026_cov_5.69099_ID_261
NODE_1403_length_4047_cov_3.96204_ID_2701
NODE_1450_length_3941_cov_3.52118_ID_2805
NODE_145_length_41135_cov_6.15828_ID_291
NODE_159_length_37919_cov_7.5131_ID_323
NODE_15_length_164716_cov_4.58508_ID_29
NODE_1679_length_3474_cov_4.18091_ID_7275
NODE_167_length_35498_cov_3.79116_ID_331
NODE_171_length_34664_cov_4.40121_ID_333
NODE_177_length_33461_cov_5.62201_ID_341
NODE_178_length_33460_cov_5.12695_ID_343
NODE_184_length_32002_cov_4.165_ID_361
NODE_1852_length_3238_cov_7.21773_ID_3485
NODE_18_length_156565_cov_4.59256_ID_33
NODE_1942_length_3111_cov_2.84188_ID_3645
NODE_194_length_29768_cov_4.86727_ID_375
NODE_202_length_28290_cov_4.0304_ID_391
NODE_209_length_27498_cov_3.9942_ID_405
NODE_20_length_146765_cov_4.55055_ID_37
NODE_210_length_27349_cov_3.72786_ID_411
NODE_211_length_27346_cov_3.43311_ID_413
NODE_227_length_25433_cov_4.46172_ID_451
NODE_229_length_25207_cov_5.10291_ID_453
NODE_22_length_138956_cov_7.40375_ID_45
NODE_234_length_24364_cov_4.0666_ID_463
NODE_2371_length_2644_cov_3.34291_ID_4383
NODE_243_length_23085_cov_3.54866_ID_477
NODE_2508_length_2539_cov_5.08138_ID_4613
NODE_250_length_22651_cov_4.70964_ID_489
NODE_255_length_21796_cov_6.80186_ID_537
NODE_265_length_21247_cov_4.17934_ID_517
NODE_28_length_125832_cov_7.91325_ID_51
NODE_290_length_19611_cov_3.666_ID_561
NODE_320_length_18064_cov_5.06507_ID_607
NODE_324_length_17956_cov_3.49393_ID_615
NODE_33_length_115725_cov_5.15614_ID_61
NODE_346_length_16555_cov_11.6614_ID_707
NODE_35_length_112187_cov_6.39356_ID_67
NODE_3625_length_1940_cov_4.45751_ID_6687
NODE_366_length_15873_cov_5.59112_ID_695
NODE_37_length_108361_cov_4.19879_ID_69
NODE_40_length_103040_cov_4.70113_ID_77
NODE_418_length_13504_cov_5.98288_ID_801
NODE_421_length_13427_cov_3.38636_ID_805
NODE_43_length_98052_cov_4.32109_ID_81
NODE_4406_length_1694_cov_3.80862_ID_8177
NODE_44_length_97721_cov_5.47261_ID_83
NODE_45_length_96811_cov_5.87841_ID_85
NODE_50_length_89922_cov_4.11639_ID_97
NODE_51_length_89836_cov_5.94286_ID_99
NODE_55_length_88706_cov_4.92087_ID_103
NODE_574_length_9830_cov_4.54882_ID_1073
NODE_59_length_85441_cov_5.77837_ID_129
NODE_5_length_303131_cov_4.64652_ID_9
NODE_612_length_9129_cov_3.22351_ID_1141
NODE_6162_length_1338_cov_2.54846_ID_11599
NODE_62_length_84844_cov_5.01496_ID_117
NODE_641_length_8695_cov_4.80617_ID_1205
NODE_65_length_82951_cov_5.23016_ID_17
NODE_7452_length_1169_cov_4.03455_ID_14097
NODE_77_length_74084_cov_5.57899_ID_141
NODE_78_length_73787_cov_4.14878_ID_145
NODE_80_length_71919_cov_6.24045_ID_153
NODE_82_length_70784_cov_4.1528_ID_159
NODE_84_length_70084_cov_4.74118_ID_163
NODE_86_length_69802_cov_7.4231_ID_165
NODE_8_length_241784_cov_4.92295_ID_15
NODE_961_length_5776_cov_2.9583_ID_1847
NODE_97_length_62540_cov_4.04069_ID_187
NODE_9_length_229635_cov_5.91628_ID_123

## Sheet: Group9
NODE_100_length_61889_cov_46.7484_ID_197
NODE_101_length_61598_cov_47.3861_ID_195
NODE_105_length_60235_cov_48.6649_ID_209
NODE_106_length_59433_cov_50.2775_ID_203
NODE_109_length_56567_cov_72.2342_ID_219
NODE_112_length_55324_cov_42.3458_ID_227
NODE_1132_length_4934_cov_50.5871_ID_2219
NODE_113_length_54792_cov_57.1216_ID_239
NODE_117_length_52764_cov_48.1481_ID_257
NODE_118_length_52674_cov_54.7911_ID_247
NODE_1211_length_4629_cov_41.8193_ID_2333
NODE_1217_length_4597_cov_50.9971_ID_2337
NODE_121_length_50873_cov_57.2329_ID_293
NODE_124_length_50584_cov_48.7973_ID_245
NODE_1254_length_4484_cov_54.4727_ID_1713
NODE_125_length_50232_cov_53.5099_ID_243
NODE_1274_length_4407_cov_73.2019_ID_2645
NODE_127_length_48756_cov_55.7986_ID_265
NODE_129_length_47046_cov_56.7083_ID_269
NODE_130_length_46420_cov_61.384_ID_251
NODE_132_length_45517_cov_61.0446_ID_349
NODE_134_length_44470_cov_57.4356_ID_223
NODE_140_length_42563_cov_56.2555_ID_267
NODE_1423_length_3994_cov_55.9287_ID_4177
NODE_155_length_38257_cov_48.7121_ID_307
NODE_156_length_38251_cov_82.0016_ID_309
NODE_158_length_37979_cov_41.6815_ID_133
NODE_1596_length_3601_cov_59.5277_ID_91361
NODE_161_length_37716_cov_44.9314_ID_327
NODE_162_length_37496_cov_53.3614_ID_325
NODE_1645_length_3533_cov_50.1088_ID_91837
NODE_1658_length_3510_cov_41.5124_ID_91429
NODE_166_length_35719_cov_47.1193_ID_329
NODE_1690_length_3455_cov_40.751_ID_91835
NODE_169_length_35229_cov_46.4954_ID_359
NODE_174_length_33926_cov_48.215_ID_345
NODE_175_length_33869_cov_50.8896_ID_339
NODE_1816_length_3292_cov_90.22_ID_4781
NODE_182_length_32435_cov_109.324_ID_407
NODE_1834_length_3267_cov_48.4941_ID_91905
NODE_183_length_32079_cov_45.5182_ID_365
NODE_1854_length_3236_cov_47.5409_ID_91507
NODE_1875_length_3203_cov_56.7808_ID_91601
NODE_188_length_30698_cov_44.5299_ID_369
NODE_190_length_30621_cov_46.9973_ID_385
NODE_1941_length_3113_cov_38.9501_ID_91155
NODE_1970_length_3078_cov_54.8292_ID_4421
NODE_197_length_29285_cov_43.932_ID_383
NODE_2001_length_3038_cov_40.5059_ID_91349
NODE_2012_length_3015_cov_36.3652_ID_91611
NODE_2031_length_2991_cov_57.3658_ID_92037
NODE_2063_length_2952_cov_36.0676_ID_91999
NODE_2111_length_2895_cov_241.185_ID_10115
NODE_2129_length_2879_cov_38.6907_ID_91523
NODE_21_length_139228_cov_62.2805_ID_15619
NODE_2357_length_2655_cov_46.5928_ID_92035
NODE_236_length_24202_cov_44.0925_ID_467
NODE_2377_length_2640_cov_40.0152_ID_92043
NODE_2379_length_2639_cov_39.7942_ID_91241
NODE_238_length_23993_cov_52.0594_ID_12405
NODE_2496_length_2548_cov_42.4466_ID_91995
NODE_2530_length_2524_cov_46.7927_ID_91761
NODE_2533_length_2522_cov_38.8838_ID_91211
NODE_2576_length_2489_cov_45.2314_ID_92097
NODE_260_length_21524_cov_73.8251_ID_641
NODE_261_length_21518_cov_45.2813_ID_109
NODE_2652_length_2437_cov_52.3784_ID_4861
NODE_2660_length_2434_cov_47.4266_ID_91453
NODE_2710_length_2393_cov_34.9281_ID_91435
NODE_2731_length_2372_cov_49.2228_ID_91839
NODE_274_length_20813_cov_59.1721_ID_93
NODE_277_length_20656_cov_72.5892_ID_569
NODE_27_length_126426_cov_55.0443_ID_53
NODE_2806_length_2323_cov_43.4809_ID_91451
NODE_283_length_20399_cov_49.3015_ID_783
NODE_291_length_19583_cov_50.7859_ID_579
NODE_2934_length_2248_cov_37.2272_ID_92011
NODE_2950_length_2239_cov_54.9903_ID_91605
NODE_297_length_19173_cov_44.1608_ID_655
NODE_29_length_122912_cov_50.4709_ID_2409
NODE_3005_length_2214_cov_46.5119_ID_91903
NODE_303_length_18706_cov_49.5919_ID_593
NODE_307_length_18582_cov_44.9164_ID_639
NODE_313_length_18236_cov_45.3984_ID_313
NODE_315_length_18231_cov_139.358_ID_631
NODE_3184_length_2124_cov_59.0861_ID_92047
NODE_32_length_116046_cov_57.9202_ID_63
NODE_331_length_17565_cov_51.4802_ID_627
NODE_335_length_17235_cov_43.1777_ID_871
NODE_336_length_17194_cov_67.7923_ID_977
NODE_337_length_17070_cov_46.0122_ID_597
NODE_339_length_16810_cov_40.7925_ID_671
NODE_341_length_16705_cov_42.5157_ID_647
NODE_345_length_16567_cov_55.6655_ID_1155
NODE_34_length_115346_cov_57.0971_ID_14869
NODE_354_length_16244_cov_49.1049_ID_669
NODE_368_length_15839_cov_43.9803_ID_697
NODE_36_length_110485_cov_45.0441_ID_71
NODE_374_length_15408_cov_75.7663_ID_747
NODE_375_length_15398_cov_46.1248_ID_509
NODE_379_length_15217_cov_133.011_ID_809
NODE_394_length_14766_cov_49.2086_ID_749
NODE_401_length_14362_cov_84.2209_ID_807
NODE_430_length_13136_cov_55.4781_ID_833
NODE_433_length_13070_cov_63.922_ID_1031
NODE_440_length_12899_cov_51.0156_ID_1521
NODE_443_length_12850_cov_146.193_ID_1243
NODE_446_length_12780_cov_60.5458_ID_863
NODE_459_length_12144_cov_49.6676_ID_2291
NODE_465_length_12015_cov_70.953_ID_1085
NODE_468_length_11924_cov_43.2073_ID_889
NODE_46_length_95183_cov_48.7633_ID_24201
NODE_48_length_92411_cov_59.9285_ID_535
NODE_4951_length_1559_cov_44.9537_ID_9475
NODE_496_length_11436_cov_51.0541_ID_1367
NODE_515_length_10881_cov_105.59_ID_965
NODE_518_length_10851_cov_50.6196_ID_987
NODE_5222_length_1504_cov_46.4794_ID_91645
NODE_525_length_10773_cov_45.0382_ID_759
NODE_536_length_10588_cov_52.4845_ID_1449
NODE_54_length_88876_cov_60.9003_ID_711
NODE_5521_length_1446_cov_46.6471_ID_92051
NODE_5724_length_1413_cov_57.8973_ID_91817
NODE_5785_length_1401_cov_39.6096_ID_91293
NODE_580_length_9716_cov_40.7637_ID_643
NODE_587_length_9605_cov_49.4646_ID_1211
NODE_58_length_86232_cov_57.9121_ID_113
NODE_6000_length_1365_cov_46.2253_ID_91875
NODE_611_length_9143_cov_47.9075_ID_1221
NODE_61_length_85011_cov_65.8942_ID_29617
NODE_63_length_84382_cov_49.7389_ID_131
NODE_6427_length_1302_cov_34.0641_ID_92153
NODE_676_length_8339_cov_201.88_ID_1659
NODE_67_length_81483_cov_63.2991_ID_59
NODE_682_length_8277_cov_45.1269_ID_1299
NODE_691_length_8190_cov_45.9136_ID_1415
NODE_696_length_8148_cov_47.3398_ID_1317
NODE_697_length_8108_cov_87.4672_ID_1467
NODE_71_length_78309_cov_48.6694_ID_139
NODE_725_length_7780_cov_49.2946_ID_1381
NODE_735_length_7739_cov_49.0544_ID_1711
NODE_7370_length_1180_cov_46.865_ID_91381
NODE_7472_length_1166_cov_45.3072_ID_91739
NODE_7487_length_1164_cov_46.3781_ID_92133
NODE_75_length_74603_cov_53.4683_ID_143
NODE_7847_length_1126_cov_39.3699_ID_65
NODE_786_length_7150_cov_41.9839_ID_1497
NODE_7924_length_1117_cov_37.8893_ID_91639
NODE_79_length_72747_cov_49.2041_ID_9163
NODE_812_length_6971_cov_38.2861_ID_2339
NODE_81_length_71851_cov_62.4154_ID_169
NODE_8230_length_1085_cov_42.8858_ID_39
NODE_824_length_6899_cov_48.3471_ID_1573
NODE_844_length_6716_cov_64.7113_ID_1717
NODE_85_length_69852_cov_74.5106_ID_2953
NODE_865_length_6518_cov_54.5114_ID_1653
NODE_867_length_6500_cov_53.5746_ID_1661
NODE_876_length_6280_cov_45.4155_ID_92191
NODE_90_length_66517_cov_56.6447_ID_205
NODE_972_length_5703_cov_52.9318_ID_1963
NODE_974_length_5690_cov_41.2398_ID_2049
NODE_981_length_5666_cov_43.8912_ID_1009
NODE_98_length_62534_cov_71.0433_ID_217
